# Supplementary material
Source: publisher figshare collection journal article supplement (https://acs.figshare.com/ndownloader/files/3807124)
Supplement: Supplementary file 1 [file 3807124]

## Sheet: Sheet1
No.	Name	Smiles	Activity	Unit	Dataset	Reference
1	allopurinol	Oc1[nH]cnc-2nncc1-2	1.75	%PPB	PPB	Zhu et al., 2013
2	diamorphine	O1C2C34C(C(N(CC3)C)Cc3c4c1c(OC(=O)C)cc3)C=CC2OC(=O)C	0.5	%PPB	PPB	Zhu et al., 2013
3	diethylcarbamazine	O=C(N(CC)CC)N1CCN(CC1)C	0.5	%PPB	PPB	Zhu et al., 2013
4	eflornithine	FC(F)C(N)(CCCN)C(O)=O	0.5	%PPB	PPB	Zhu et al., 2013
5	ethanol	OCC	0.5	%PPB	PPB	Zhu et al., 2013
6	ethosuximide	O=C1NC(=O)CC1(CC)C	0.5	%PPB	PPB	Zhu et al., 2013
7	fludarabine	Fc1nc(N)c2ncn(c2n1)C1OC(CO)C(O)C1O	0.5	%PPB	PPB	Zhu et al., 2013
8	fomepizole	[nH]1ncc(c1)C	0.5	%PPB	PPB	Zhu et al., 2013
9	gabapentin	OC(=O)C1(CCCCC1)CN	0.5	%PPB	PPB	Zhu et al., 2013
10	idoxuridine	IC1CN(C2OC(CO)C(O)C2)C(=O)NC1=O	0.5	%PPB	PPB	Zhu et al., 2013
11	ifosfamide	ClCCN1P(OCCC1)(=O)NCCCl	0.5	%PPB	PPB	Zhu et al., 2013
12	isoxsuprine	O(CC(NC(C(O)c1ccc(O)cc1)C)C)c1ccccc1	0.5	%PPB	PPB	Zhu et al., 2013
13	levocarnitine	OC(CC(O)=O)C[N+](C)(C)C	0.5	%PPB	PPB	Zhu et al., 2013
14	levodopa	Oc1cc(ccc1O)CC(N)C(O)=O	0.5	%PPB	PPB	Zhu et al., 2013
15	mesuximide	O=C1N(C)C(=O)CC1(C)c1ccccc1	0.5	%PPB	PPB	Zhu et al., 2013
16	metformin	N(=C(\N)/N)/C(N(C)C)=N	0.5	%PPB	PPB	Zhu et al., 2013
17	methanol	OC	0.5	%PPB	PPB	Zhu et al., 2013
18	neostigmine	O(C(=O)N(C)C)c1cc([N+](C)(C)[CH2-])ccc1	0.5	%PPB	PPB	Zhu et al., 2013
19	ouabain	O1C(C)C(O)C(O)C(O)C1OC1CC2(O)CCC3C(C2(CO)C(O)C1)C(O)CC1(C)C(CCC13O)C1=CC(OC1)=O	0.5	%PPB	PPB	Zhu et al., 2013
20	oxalic acid	OC(=O)C(O)=O	0.5	%PPB	PPB	Zhu et al., 2013
21	oxytocin	S1SCC(NC(=O)C(NC(=O)C(NC(=O)C(NC(=O)C(NC(=O)C(N)C1)Cc1ccc(O)cc1)C(CC)C)CCC(=O)N)CC(=O)N)C(=O)N1CCCC1C(=O)NC(CC(C)C)C(=O)NCC(=O)N	0.5	%PPB	PPB	Zhu et al., 2013
22	pentoxifylline	O=C1N(CCCCC(=O)C)C(=O)N(c2ncn(c12)C)C	0.5	%PPB	PPB	Zhu et al., 2013
23	pyridostigmine	O(C(=O)N(C)C)C=1C=CCN(C=1)C	0.5	%PPB	PPB	Zhu et al., 2013
24	pyridoxine	Oc1c(CO)c(cnc1C)CO	0.5	%PPB	PPB	Zhu et al., 2013
25	thiamazole	Sc1nccn1C	0.5	%PPB	PPB	Zhu et al., 2013
26	tiapride	S(=O)(=O)(C)c1cc(C(=O)NCCN(CC)CC)c(OC)cc1	0.5	%PPB	PPB	Zhu et al., 2013
27	trimethadione	O1C(C)(C)C(=O)N(C)C1=O	0.5	%PPB	PPB	Zhu et al., 2013
28	azacitidine	O1C(CO)C(O)C(O)C1N1C=NC(=NC1=O)N	1	%PPB	PPB	Zhu et al., 2013
29	acipimox	OC(=O)c1ncc([n+]([O-])c1)C	2	%PPB	PPB	Zhu et al., 2013
30	argipressin	S1SCC(NC(=O)C(NC(=O)C(NC(=O)C(NC(=O)C(NC(=O)C(N)C1)Cc1ccc(O)cc1)c1ccccc1)CCC(=O)N)CC(=O)N)C(=O)N1CCCC1C(=O)NC(CCC\N=C(\N)/N)C(=O)NCC(=O)N	2	%PPB	PPB	Zhu et al., 2013
31	dexrazoxane	O=C1NC(=O)CN(C1)C(CN1CC(=O)NC(=O)C1)C	2	%PPB	PPB	Zhu et al., 2013
32	ganciclovir	Oc1nc(nc2n(cnc12)COC(CO)CO)N	2	%PPB	PPB	Zhu et al., 2013
33	kanamycin-A	O1C(CN)C(O)C(O)C(O)C1OC1C(O)C(OC2OC(CO)C(O)C(N)C2O)C(N)CC1N	2	%PPB	PPB	Zhu et al., 2013
34	miglitol	OC1C(O)C(O)CN(CCO)C1CO	2	%PPB	PPB	Zhu et al., 2013
35	obidoxime	O(CN1C=C\C(\C=C1)=C\N=O)CN1C=C\C(\C=C1)=C\N=O	2	%PPB	PPB	Zhu et al., 2013
36	acamprosate	S(O)(=O)(=O)CCCNC(=O)C	3	%PPB	PPB	Zhu et al., 2013
37	betahistine	n1ccccc1CCNC	3	%PPB	PPB	Zhu et al., 2013
38	hydroxyurea	O=C(NO)N	3	%PPB	PPB	Zhu et al., 2013
39	minoxidil	O=N1=C(N)C=C(N=C1N)N1CCCCC1	3	%PPB	PPB	Zhu et al., 2013
40	pentostatin	O1C(CO)C(O)CC1n1c2NC=NCC(O)c2nc1	3	%PPB	PPB	Zhu et al., 2013
41	stavudine	O1C(C=CC1N1C=C(C)C(=O)NC1=O)CO	3	%PPB	PPB	Zhu et al., 2013
42	tranexamic acid	OC(=O)C1CCC(CC1)CN	3	%PPB	PPB	Zhu et al., 2013
43	xamoterol	O1CCN(CC1)C(=O)NCCNCC(O)COc1ccc(O)cc1	3	%PPB	PPB	Zhu et al., 2013
44	zalcitabine	O1C(CCC1N1C=CC(=NC1=O)N)CO	3	%PPB	PPB	Zhu et al., 2013
45	meropenem	S(C=1C(C2N(C(=O)C2C(O)C)C=1C(O)=O)C)C1CC(NC1)C(=O)N(C)C	4	%PPB	PPB	Zhu et al., 2013
46	amifostine	S(P(O)(O)=O)CCNCCCN	4	%PPB	PPB	Zhu et al., 2013
47	flucytosine	Fc1cnc(O)nc1N	4	%PPB	PPB	Zhu et al., 2013
48	mebhydrolin	n1(c2CCN(Cc2c2c1cccc2)C)Cc1ccccc1	4	%PPB	PPB	Zhu et al., 2013
49	prenalterol	O(CC(O)CNC(C)C)c1ccc(O)cc1	4	%PPB	PPB	Zhu et al., 2013
50	ribavirin	O1C(CO)C(O)C(O)C1n1nc(nc1)C(=O)N	4	%PPB	PPB	Zhu et al., 2013
51	atenolol	O(CC(O)CNC(C)C)c1ccc(cc1)CC(=O)N	5	%PPB	PPB	Zhu et al., 2013
52	cidofovir	P(O)(O)(=O)COC(CN1C=CC(=NC1=O)N)CO	5	%PPB	PPB	Zhu et al., 2013
53	diatrizoic acid	Ic1c(C(O)=O)c(I)c(NC(=O)C)c(I)c1NC(=O)C	5	%PPB	PPB	Zhu et al., 2013
54	iohexol	Ic1c(C(=O)NCC(O)CO)c(I)c(N(C(=O)C)CC(O)CO)c(I)c1C(=O)NCC(O)CO	5	%PPB	PPB	Zhu et al., 2013
55	levetiracetam	O=C1N(CCC1)C(CC)C(=O)N	5	%PPB	PPB	Zhu et al., 2013
56	moxonidine	Clc1nc(nc(OC)c1NC=1NCCN=1)C	5	%PPB	PPB	Zhu et al., 2013
57	nicotine	n1cc(ccc1)C1N(CCC1)C	5	%PPB	PPB	Zhu et al., 2013
58	pralidoxime chloride	O=N\C=C/1\N(C=CC=C\1)C	5	%PPB	PPB	Zhu et al., 2013
59	roxatidine	O(CCCNC(=O)COC(=O)C)c1cc(ccc1)CN1CCCCC1	5	%PPB	PPB	Zhu et al., 2013
60	spectinomycin	O1C2C(OC3OC(CC(=O)C13O)C)C(O)C(NC)C(O)C2NC	5	%PPB	PPB	Zhu et al., 2013
61	amikacin	O1C(CN)C(O)C(O)C(O)C1OC1C(O)C(OC2OC(CO)C(O)C(N)C2O)C(NC(=O)C(O)CCN)CC1N	6	%PPB	PPB	Zhu et al., 2013
62	procaine	O(C(=O)c1ccc(N)cc1)CCN(CC)CC	6	%PPB	PPB	Zhu et al., 2013
63	acetanilide	O=C(Nc1ccccc1)C	7	%PPB	PPB	Zhu et al., 2013
64	antipyrine	O=C1N(N(C)C(=C1)C)c1ccccc1	7	%PPB	PPB	Zhu et al., 2013
65	bretylium	Brc1ccccc1C[N+](CC)(C)C	7	%PPB	PPB	Zhu et al., 2013
66	penicillin5	S1C2N(C(C(O)=O)C1(C)C)C(=O)C2NC(=O)COC	7	%PPB	PPB	Zhu et al., 2013
67	phensuximide	O=C1N(C)C(=O)CC1c1ccccc1	7	%PPB	PPB	Zhu et al., 2013
68	tenofovir disoproxil	P(OCOC(OC(C)C)=O)(OCOC(OC(C)C)=O)(=O)COC(Cn1c2ncnc(N)c2nc1)C	7	%PPB	PPB	Zhu et al., 2013
69	tirofiban	S(=O)(=O)(NC(Cc1ccc(OCCCCC2CCNCC2)cc1)C(O)=O)CCCC	7	%PPB	PPB	Zhu et al., 2013
70	acetaminophen	Oc1ccc(NC(=O)C)cc1	8	%PPB	PPB	Zhu et al., 2013
71	busulfan	S(OCCCCOS(=O)(=O)C)(=O)(=O)C	8	%PPB	PPB	Zhu et al., 2013
72	sulfaguanidine	S(=O)(=O)(NC(N)=N)c1ccc(N)cc1	8	%PPB	PPB	Zhu et al., 2013
73	acecainide	O=C(NCCN(CC)CC)c1ccc(NC(=O)C)cc1	10	%PPB	PPB	Zhu et al., 2013
74	albuterol	Oc1ccc(cc1CO)C(O)CNC(C)(C)C	10	%PPB	PPB	Zhu et al., 2013
75	azatadine	n1c/2c(CCc3c(cccc3)\C\2=C\2/CCN(CC/2)C)ccc1	10	%PPB	PPB	Zhu et al., 2013
76	benzydamine	O(CCCN(C)C)c1nn(c2c1cccc2)Cc1ccccc1	10	%PPB	PPB	Zhu et al., 2013
77	bethanidine	N(=C(\NCc1ccccc1)/NC)/C	10	%PPB	PPB	Zhu et al., 2013
78	buformin	N(=C(\N=C(\N)/N)/N)/CCCC	10	%PPB	PPB	Zhu et al., 2013
79	dopamine	Oc1cc(ccc1O)CCN	10	%PPB	PPB	Zhu et al., 2013
80	fluorouracil	Fc1cnc(O)nc1O	10	%PPB	PPB	Zhu et al., 2013
81	N-butyl-scopolamine	O1C2C3[N+](C(CC(OC(=O)C(CO)c4ccccc4)C3)C12)(CCCC)C	10	%PPB	PPB	Zhu et al., 2013
82	penciclovir	Oc1nc(nc2n(cnc12)CCC(CO)CO)N	10	%PPB	PPB	Zhu et al., 2013
83	polymyxin-B	O=C1NC(CC(C)C)C(=O)NC(CCN)C(=O)NC(CCN)C(=O)NC(C(O)C)C(=O)NCCC(NC(=O)C(NC(=O)C(NC(=O)C(NC(=O)CCCCC(CC)C)CCN)C(O)C)CCN)C(=O)NC(CCN)C(=O)NC1Cc1ccccc1	10	%PPB	PPB	Zhu et al., 2013
84	propyphenazone	O=C1N(N(C)C(C)=C1C(C)C)c1ccccc1	10	%PPB	PPB	Zhu et al., 2013
85	tobramycin	O1C(CO)C(O)C(N)C(O)C1OC1C(O)C(OC2OC(CN)C(O)CC2N)C(N)CC1N	10	%PPB	PPB	Zhu et al., 2013
86	cefpirome	s1cc(nc1N)/C(=N/OC)/C(=O)NC1C2SCC(C[n+]3c4CCCc4ccc3)=C(N2C1=O)C(O)=O	11	%PPB	PPB	Zhu et al., 2013
87	fluconazole	Fc1cc(F)ccc1C(O)(Cn1ncnc1)Cn1ncnc1	21.2	%PPB	PPB	Zhu et al., 2013
88	metoprolol	O(CC(O)CNC(C)C)c1ccc(cc1)CCOC	11	%PPB	PPB	Zhu et al., 2013
89	tinidazole	S(=O)(=O)(CCn1c(ncc1[N+](=O)[O-])C)CC	11	%PPB	PPB	Zhu et al., 2013
90	codeine	O1C2C34C(C(N(CC3)C)Cc3c4c1c(OC)cc3)C=CC2O	12	%PPB	PPB	Zhu et al., 2013
91	florfenicol	ClC(Cl)C(=O)NC(C(O)c1ccc(S(=O)(=O)C)cc1)CF	12	%PPB	PPB	Zhu et al., 2013
92	methyldopa	Oc1cc(ccc1O)CC(N)(C(O)=O)C	12	%PPB	PPB	Zhu et al., 2013
93	pancuronium-bromide	O(C(=O)C)C1C2(C(CC1[N+]1(CCCCC1)C)C1C(CC2)C2(CC([N+]3(CCCCC3)C)C(OC(=O)C)CC2CC1)C)C	12	%PPB	PPB	Zhu et al., 2013
94	cephradine	S1C2N(C(=O)C2NC(=O)C(N)c2ccccc2)C(C(O)=O)=C(C1)C	12.75	%PPB	PPB	Zhu et al., 2013
95	milnacipran	O=C(N(CC)CC)C1(CC1CN)c1ccccc1	13	%PPB	PPB	Zhu et al., 2013
96	pamidronic acid	P(O)(O)(=O)C(P(O)(O)=O)(O)CCN	14	%PPB	PPB	Zhu et al., 2013
97	rizatriptan	[nH]1cc(c2cc(ccc12)Cn1ncnc1)CCN(C)C	14	%PPB	PPB	Zhu et al., 2013
98	voglibose	OC1C(O)C(O)(CC(NC(CO)CO)C1O)CO	14	%PPB	PPB	Zhu et al., 2013
99	acarbose	O1C(C)C(NC2C=C(CO)C(O)C(O)C2O)C(O)C(O)C1OC1C(O)C(O)C(OC1CO)OC1C(O)C(O)C(OC1CO)O	15	%PPB	PPB	Zhu et al., 2013
100	ascorbic acid	O1C(C(O)CO)C(=O)C(O)=C1O	15	%PPB	PPB	Zhu et al., 2013
101	beta-acetyldigoxin	O1C(C)C(OC2OC(C)C(OC(=O)C)C(O)C2)C(O)CC1OC1C(OC(OC2CC3CCC4C(CC(O)C5(C)C(CCC45O)C4=CC(OC4)=O)C3(CC2)C)CC1O)C	15	%PPB	PPB	Zhu et al., 2013
102	buserelin	Oc1ccc(cc1)CC(NC(=O)C(NC(=O)C(NC(=O)C(NC(=O)C1NC(=O)CC1)Cc1nc[nH]c1)Cc1c2c([nH]c1)cccc2)CO)C(=O)NC(C(=O)NC(CC(C)C)C(=O)NC(CCC\N=C(\N)/N)C(=O)N1CCCC1C(=O)NCC)COC(C)(C)C	15	%PPB	PPB	Zhu et al., 2013
103	carteolol	O(CC(O)CNC(C)(C)C)c1c2CCC(=O)Nc2ccc1	15	%PPB	PPB	Zhu et al., 2013
104	ethambutol	OCC(NCCNC(CC)CO)CC	15	%PPB	PPB	Zhu et al., 2013
105	famciclovir	O(C(=O)C)CC(CCn1c2nc(ncc2nc1)N)COC(=O)C	15	%PPB	PPB	Zhu et al., 2013
106	foscarnet	P(O)(O)(=O)C(O)=O	15	%PPB	PPB	Zhu et al., 2013
107	mescaline	O(C)c1c(OC)cc(cc1OC)CCN	15	%PPB	PPB	Zhu et al., 2013
108	penicillin2	S1C2N(C(C(O)=O)C1(C)C)C(=O)C2NC(=O)C	15	%PPB	PPB	Zhu et al., 2013
109	pramipexole	s1c2CC(NCCC)CCc2nc1N	15	%PPB	PPB	Zhu et al., 2013
110	ranitidine	S(Cc1oc(cc1)CN(C)C)CCN\C(\NC)=C\[N+](=O)[O-]	15	%PPB	PPB	Zhu et al., 2013
111	spiramycin-1	O1C(C)C(OC2OC(C)C(O)C(O)(C2)C)C(N(C)C)C(O)C1OC1C(OC)C(O)CC(=O)CC(C/C=C\C=C/C(OC2OC(C)C(N(C)C)CC2)C(CC1CC=O)C)C	15	%PPB	PPB	Zhu et al., 2013
112	temozolomide	O=C1n2c(N=NN1C)c(nc2)C(=O)N	15	%PPB	PPB	Zhu et al., 2013
113	tetroxoprim	O(CCOC)c1c(OC)cc(cc1OC)Cc1cnc(nc1N)N	15	%PPB	PPB	Zhu et al., 2013
114	ceftazidime	s1cc(nc1N)/C(=N/OC(C(O)=O)(C)C)/C(=O)NC1C2SCC(C[n+]3ccccc3)=C(N2C1=O)C(O)=O	15.5	%PPB	PPB	Zhu et al., 2013
115	topotecan	O1CC2=C(C=C3N(Cc4c3nc3c(c4)c(CN(C)C)c(O)cc3)C2=O)C(O)(CC)C1=O	16	%PPB	PPB	Zhu et al., 2013
116	penicillin32	S1C2N(C(C(O)=O)C1(C)C)C(=O)C2NC(=O)C(N)c1cc(O)ccc1	16.8	%PPB	PPB	Zhu et al., 2013
117	cyclophosphamide	ClCCN(P1(OCCCN1)=O)CCCl	17	%PPB	PPB	Zhu et al., 2013
118	famotidine	s1cc(nc1NC(N)=N)CSCCC(NS(=O)(=O)N)=N	17	%PPB	PPB	Zhu et al., 2013
119	sotalol	S(=O)(=O)(Nc1ccc(cc1)C(O)CNC(C)C)C	17.5	%PPB	PPB	Zhu et al., 2013
120	acyclovir	Oc1nc(nc2n(cnc12)COCCO)N	18	%PPB	PPB	Zhu et al., 2013
121	ampicillin	S1C2N(C(C(O)=O)C1(C)C)C(=O)C2NC(=O)C(N)c1ccccc1	18	%PPB	PPB	Zhu et al., 2013
122	penicillin1	S1C2N(C(C(O)=O)C1(C)C)C(=O)C2NC=O	18	%PPB	PPB	Zhu et al., 2013
123	sumatriptan	S(=O)(=O)(NC)Cc1cc2c([nH]cc2CCN(C)C)cc1	18	%PPB	PPB	Zhu et al., 2013
124	cimetidine	S(Cc1[nH]cnc1C)CCN\C(=N\C)\NC#N	19	%PPB	PPB	Zhu et al., 2013
125	bacampicillin	S1C2N(C(C(OC(OC(OCC)=O)C)=O)C1(C)C)C(=O)C2NC(=O)C(N)c1ccccc1	20	%PPB	PPB	Zhu et al., 2013
126	cefadroxil	S1C2N(C(=O)C2NC(=O)C(N)c2ccc(O)cc2)C(C(O)=O)=C(C1)C	20	%PPB	PPB	Zhu et al., 2013
127	cefepime	s1cc(nc1N)/C(=N/OC)/C(=O)NC1C2SCC(C[N+]3(CCCC3)C)=C(N2C1=O)C(O)=O	20	%PPB	PPB	Zhu et al., 2013
128	cephacetrile	S1C2N(C(=O)C2NC(=O)CC#N)C(C(O)=O)=C(C1)COC(=O)C	20	%PPB	PPB	Zhu et al., 2013
129	cephaloridine	s1cccc1CC(=O)NC1C2SCC(C[n+]3cccc[c-]3)=C(N2C1=O)C(O)=O	20	%PPB	PPB	Zhu et al., 2013
130	cycloserine	O1NC(=O)C(N)C1	20	%PPB	PPB	Zhu et al., 2013
131	deslanoside	O1C(CO)C(O)C(O)C(O)C1OC1C(OC(OC2C(OC(OC3C(OC(OC4CC5CCC6C(CC(O)C7(C)C(CCC67O)C6=CC(OC6)=O)C5(CC4)C)CC3O)C)CC2O)C)CC1O)C	20	%PPB	PPB	Zhu et al., 2013
132	gatifloxacin	Fc1cc2c(N(C=C(C(O)=O)C2=O)C2CC2)c(OC)c1N1CC(NCC1)C	20	%PPB	PPB	Zhu et al., 2013
133	goserelin	Oc1ccc(cc1)CC(NC(=O)C(NC(=O)C(NC(=O)C(NC(=O)C1NC(=O)CC1)Cc1nc[nH]c1)Cc1c2c([nH]c1)cccc2)CO)C(=O)NC(C(=O)NC(CC(C)C)C(=O)NC(CCC\N=C(\N)/N)C(=O)N1CCCC1C(=O)NNC(=O)N)COC(C)(C)C	20	%PPB	PPB	Zhu et al., 2013
134	imidapril	O=C1N(C(=O)C(NC(CCc2ccccc2)C(OCC)=O)C)C(CN1C)C(O)=O	20	%PPB	PPB	Zhu et al., 2013
135	ipratropium	O(C(=O)C(CO)c1ccccc1)C1CC2[N+](C(C1)CC2)(C(C)C)C	20	%PPB	PPB	Zhu et al., 2013
136	mercaptopurine	Sc1[nH]cnc-2ncnc1-2	20	%PPB	PPB	Zhu et al., 2013
137	naltrexone	O1C2C34CCN(C(Cc5c3c1c(O)cc5)C4(O)CCC2=O)CC1CC1	20	%PPB	PPB	Zhu et al., 2013
138	neomycin	O1C(CN)C(O)C(O)C(N)C1OC1C(O)C(OC1CO)OC1C(OC2OC(CN)C(O)C(O)C2N)C(N)CC(N)C1O	20	%PPB	PPB	Zhu et al., 2013
139	penicillin9	S1C2N(C(C(O)=O)C1(C)C)C(=O)C2NC(=O)C(OC)CC	20	%PPB	PPB	Zhu et al., 2013
140	primidone	O=C1NCNC(=O)C1(CC)c1ccccc1	20	%PPB	PPB	Zhu et al., 2013
141	biotin	S1CC2NC(=O)NC2C1CCCCC(O)=O	20	%PPB	PPB	Zhu et al., 2013
142	acebutolol	O(CC(O)CNC(C)C)c1ccc(NC(=O)CCC)cc1C(=O)C	22	%PPB	PPB	Zhu et al., 2013
143	erythromycylamine	O1C(OC2C(C)C(OC3OC(C)C(O)C(OC)(C3)C)C(CC(OC(CC)C(O)(C)C(O)C(C)C(N)C(CC2(O)C)C)=O)C)C(O)C(N(C)C)CC1C	22	%PPB	PPB	Zhu et al., 2013
144	methylphenidate	O(C(=O)C(C1NCCCC1)c1ccccc1)C	22	%PPB	PPB	Zhu et al., 2013
145	niacin	OC(=O)c1cccnc1	22	%PPB	PPB	Zhu et al., 2013
146	clavulanate	O\1C2N(C(C(O)=O)/C/1=C/CO)C(=O)C2	23	%PPB	PPB	Zhu et al., 2013
147	felbamate	O(CC(COC(=O)N)c1ccccc1)C(=O)N	23	%PPB	PPB	Zhu et al., 2013
148	tazobactam	S1(=O)(=O)C2N(C(C(O)=O)C1(Cn1nncc1)C)C(=O)C2	23	%PPB	PPB	Zhu et al., 2013
149	tolazoline	N1CCN=C1Cc1ccccc1	23	%PPB	PPB	Zhu et al., 2013
150	aminoglutethimide	O=C1NC(=O)CCC1(CC)c1ccc(N)cc1	24	%PPB	PPB	Zhu et al., 2013
151	digoxin	O1C(C)C(OC2OC(C)C(O)C(O)C2)C(O)CC1OC1C(OC(OC2CC3CCC4C(CC(O)C5(C)C(CCC45O)C4=CC(OC4)=O)C3(CC2)C)CC1O)C	24	%PPB	PPB	Zhu et al., 2013
152	pholcodine	O1C2C34C(C(N(CC3)C)Cc3c4c1c(OCCN1CCOCC1)cc3)C=CC2O	24	%PPB	PPB	Zhu et al., 2013
153	alpha-acetyldigoxin	O1C(C)C(OC2OC(C)C(O)C(OC(=O)C)C2)C(O)CC1OC1C(OC(OC2CC3CCC4C(CC(O)C5(C)C(CCC45O)C4=CC(OC4)=O)C3(CC2)C)CC1O)C	25	%PPB	PPB	Zhu et al., 2013
154	azathioprine	S(c1n(cnc1[N+](=O)[O-])C)c1[nH]cnc-2ncnc1-2	25	%PPB	PPB	Zhu et al., 2013
155	cefaclor	ClC=1CSC2N(C(=O)C2NC(=O)C(N)c2ccccc2)C=1C(O)=O	25	%PPB	PPB	Zhu et al., 2013
156	celiprolol	O(CC(O)CNC(C)(C)C)c1ccc(NC(=O)N(CC)CC)cc1C(=O)C	25	%PPB	PPB	Zhu et al., 2013
157	lanatoside-C	O1C(CO)C(O)C(O)C(O)C1OC1C(OC(OC2C(OC(OC3C(OC(OC4CC5CCC6C(CC(O)C7C(CCC67O)C6=CC(OC6)=O)C5(CC4)C)CC3O)C)CC2O)C)CC1OC(=O)C)C	25	%PPB	PPB	Zhu et al., 2013
158	loracarbef	ClC=1CCC2N(C(=O)C2NC(=O)C(N)c2ccccc2)C=1C(O)=O	25	%PPB	PPB	Zhu et al., 2013
159	nadolol	O(CC(O)CNC(C)(C)C)c1c2CC(O)C(O)Cc2ccc1	25	%PPB	PPB	Zhu et al., 2013
160	penicillin11	S1C2N(C(C(O)=O)C1(C)C)C(=O)C2NC(=O)CCOCC	25	%PPB	PPB	Zhu et al., 2013
161	zolmitriptan	O1CC(NC1=O)Cc1cc2c([nH]cc2CCN(C)C)cc1	25	%PPB	PPB	Zhu et al., 2013
162	butobarbital	O=C1NC(=O)NC(=O)C1(CCCC)CC	26	%PPB	PPB	Zhu et al., 2013
163	secbutabarbital	O=C1NC(=O)NC(=O)C1(C(CC)C)CC	26	%PPB	PPB	Zhu et al., 2013
164	venlafaxine	O(C)c1ccc(cc1)C(CN(C)C)C1(O)CCCCC1	27	%PPB	PPB	Zhu et al., 2013
165	dextroamphetamine	NC(Cc1ccccc1)C	28	%PPB	PPB	Zhu et al., 2013
166	naratriptan	S(=O)(=O)(NC)CCc1cc2c([nH]cc2C2CCN(CC2)C)cc1	28	%PPB	PPB	Zhu et al., 2013
167	penicillin6	S1C2N(C(C(O)=O)C1(C)C)C(=O)C2NC(=O)COCC	28	%PPB	PPB	Zhu et al., 2013
168	azlocillin	S1C2N(C(C(O)=O)C1(C)C)C(=O)C2NC(=O)C(NC(=O)N1CCNC1=O)c1ccccc1	29	%PPB	PPB	Zhu et al., 2013
169	captopril	SCC(C(=O)N1CCCC1C(O)=O)C	29	%PPB	PPB	Zhu et al., 2013
170	cefpodoxime proxetil	s1cc(nc1N)/C(=N/OC)/C(=O)NC1C2SCC(COC)=C(N2C1=O)C(OC(OC(OC(C)C)=O)C)=O	29	%PPB	PPB	Zhu et al., 2013
171	amidopyrine	O=C1N(N(C)C(C)=C1N(C)C)c1ccccc1	30	%PPB	PPB	Zhu et al., 2013
172	bisoprolol	O(CC(O)CNC(C)C)c1ccc(cc1)COCCOC(C)C	30	%PPB	PPB	Zhu et al., 2013
173	dextrose	O1C(CO)C(O)C(O)C(O)C1O	30	%PPB	PPB	Zhu et al., 2013
174	dorzolamide	s1c2S(=O)(=O)C(CC(NCC)c2cc1S(=O)(=O)N)C	30	%PPB	PPB	Zhu et al., 2013
175	ethionamide	S=C(N)c1cc(ncc1)CC	30	%PPB	PPB	Zhu et al., 2013
176	isosorbide-dinitrate	O1C2C(OCC2O[N+](=O)[O-])C(O[N+](=O)[O-])C1	30	%PPB	PPB	Zhu et al., 2013
177	O-desmethylvenlafaxine	OC1(CCCCC1)C(CN(C)C)c1ccc(O)cc1	30	%PPB	PPB	Zhu et al., 2013
178	pefloxacin	Fc1cc2c(N(C=C(C(O)=O)C2=O)CC)cc1N1CCN(CC1)C	30	%PPB	PPB	Zhu et al., 2013
179	phenacetin	O(CC)c1ccc(NC(=O)C)cc1	30	%PPB	PPB	Zhu et al., 2013
180	pipemidic acid	O=C1c2c(nc(nc2)N2CCNCC2)N(C=C1C(O)=O)CC	30	%PPB	PPB	Zhu et al., 2013
181	piperacillin	S1C2N(C(C(O)=O)C1(C)C)C(=O)C2NC(=O)C(NC(=O)N1CCN(CC)C(=O)C1=O)c1ccccc1	30	%PPB	PPB	Zhu et al., 2013
182	practolol	O(CC(O)CNC(C)C)c1ccc(NC(=O)C)cc1	30	%PPB	PPB	Zhu et al., 2013
183	ritodrine	Oc1ccc(cc1)C(O)C(NCCc1ccc(O)cc1)C	30	%PPB	PPB	Zhu et al., 2013
184	rocuronium	O1CCN(CC1)C1CC2(C(CC1O)CCC1C3CC([N+]4(CCCC4)CC=C)C(OC(=O)C)C3(CCC12)C)C	30	%PPB	PPB	Zhu et al., 2013
185	succinylcholine	O(C(=O)CCC(OCC[N+](C)(C)C)=O)CC[N+](C)(C)C	30	%PPB	PPB	Zhu et al., 2013
186	tandospirone	O=C1N(CCCCN2CCN(CC2)c2ncccn2)C(=O)C2C1C1CC2CC1	30	%PPB	PPB	Zhu et al., 2013
187	tizanidine	Clc1ccc2nsnc2c1NC=1NCCN=1	30	%PPB	PPB	Zhu et al., 2013
188	doxacurium	O(C)c1c(OC)cc(cc1OC)CC1[N+](CCc2c1c(OC)c(OC)c(OC)c2)(CCCOC(=O)CCC(OCCC[N+]1(CCc2c(c(OC)c(OC)c(OC)c2)C1Cc1cc(OC)c(OC)c(OC)c1)C)=O)C	31	%PPB	PPB	Zhu et al., 2013
189	linezolid	Fc1cc(N2CC(OC2=O)CNC(=O)C)ccc1N1CCOCC1	31	%PPB	PPB	Zhu et al., 2013
190	oxytetracycline	OC12C(C(N(C)C)C(=O)C(C(=O)N)=C1O)C(O)C1C(=C2O)C(=O)c2c(cccc2O)C1(O)C	31	%PPB	PPB	Zhu et al., 2013
191	caffeine	O=C1N(C)C(=O)N(c2ncn(c12)C)C	32	%PPB	PPB	Zhu et al., 2013
192	cefuroxime	S1C2N(C(=O)C2NC(=O)\C(=N/OC)\c2occc2)C(C(O)=O)=C(C1)COC(=O)N	32	%PPB	PPB	Zhu et al., 2013
193	mezlocillin	S1C2N(C(C(O)=O)C1(C)C)C(=O)C2NC(=O)C(NC(=O)N1CCN(S(=O)(=O)C)C1=O)c1ccccc1	32	%PPB	PPB	Zhu et al., 2013
194	morphine	O1C2C34C(C(N(CC3)C)Cc3c4c1c(O)cc3)C=CC2O	32	%PPB	PPB	Zhu et al., 2013
195	penicillin72	S1C2N(C(C(O)=O)C1(C)C)C(=O)C2NC(=O)CC(N)c1sccc1	32	%PPB	PPB	Zhu et al., 2013
196	enoxacin	Fc1cc2c(nc1N1CCNCC1)N(C=C(C(O)=O)C2=O)CC	33	%PPB	PPB	Zhu et al., 2013
197	penicillin12	S1C2N(C(C(O)=O)C1(C)C)C(=O)C2NC(=O)C(N)CCC	33	%PPB	PPB	Zhu et al., 2013
198	chloral-hydrate	ClC(Cl)(Cl)C(O)O	35	%PPB	PPB	Zhu et al., 2013
199	cilastatin	S(CC(N)C(O)=O)CCCC\C=C(\NC(=O)C1CC1(C)C)/C(O)=O	35	%PPB	PPB	Zhu et al., 2013
200	ciprofloxacin	Fc1cc2c(N(C=C(C(O)=O)C2=O)C2CC2)cc1N1CCNCC1	35	%PPB	PPB	Zhu et al., 2013
201	dexfenfluramine	FC(F)(F)c1cc(ccc1)CC(NCC)C	35	%PPB	PPB	Zhu et al., 2013
202	ketamine	Clc1ccccc1C1(NC)CCCCC1=O	35	%PPB	PPB	Zhu et al., 2013
203	methylergonovine	OCC(NC(=O)C1C=C2C(N(C1)C)Cc1c3c2cccc3[nH]c1)CC	35	%PPB	PPB	Zhu et al., 2013
204	metoclopramide	Clc1cc(C(=O)NCCN(CC)CC)c(OC)cc1N	35	%PPB	PPB	Zhu et al., 2013
205	metocurine-iodide	O1c2cc3C([N+](CCc3cc2OC)(C)C)Cc2ccc(Oc3c4C([N+](CCc4cc(OC)c3OC)(C)C)Cc3cc1c(OC)cc3)cc2	35	%PPB	PPB	Zhu et al., 2013
206	sulfadiazine	S(=O)(=O)(Nc1ncccn1)c1ccc(N)cc1	35	%PPB	PPB	Zhu et al., 2013
207	trichloroethanol	ClC(Cl)(Cl)CO	35	%PPB	PPB	Zhu et al., 2013
208	phenobarbital	O=C1NC(=O)NC(=O)C1(CC)c1ccccc1	35.2	%PPB	PPB	Zhu et al., 2013
209	cefotaxime	s1cc(nc1N)/C(=N/OC)/C(=O)NC1C2SCC(COC(=O)C)=C(N2C1=O)C(O)=O	36	%PPB	PPB	Zhu et al., 2013
210	clodronic acid	ClC(Cl)(P(O)(O)=O)P(O)(O)=O	36	%PPB	PPB	Zhu et al., 2013
211	zidovudine	O1C(CO)C([N-][N+]#N)CC1N1C=C(C)C(=O)NC1=O	36	%PPB	PPB	Zhu et al., 2013
212	nalmefene	O1C2C34CCN(C(Cc5c3c1c(O)cc5)C4(O)CCC2=C)CC1CC1	38	%PPB	PPB	Zhu et al., 2013
213	penicillin34	S1C2N(C(C(O)=O)C1(C)C)C(=O)C2NC(=O)C(N)c1ccc(OC)cc1	38	%PPB	PPB	Zhu et al., 2013
214	methicillin	S1C2N(C(C(O)=O)C1(C)C)C(=O)C2NC(=O)c1c(OC)cccc1OC	39	%PPB	PPB	Zhu et al., 2013
215	alcuronium	OC\C=C/1\C2C=3C4N(C=C5C\6CC7[N+](C/C/6=C\CO)(CCC67C5N(C=3)c3c6cccc3)CC=C)c3c(C45C([N+](C\1)(CC5)CC=C)C2)cccc3	40	%PPB	PPB	Zhu et al., 2013
216	amiloride	Clc1nc(C(=O)NC(N)=N)c(nc1N)N	40	%PPB	PPB	Zhu et al., 2013
217	cefotiam	s1cc(nc1N)CC(=O)NC1C2SCC(CSc3nncn3CCN(C)C)=C(N2C1=O)C(O)=O	40	%PPB	PPB	Zhu et al., 2013
218	colchicine	O(C)C1=CC=C2C(=CC1=O)C(NC(=O)C)CCc1c2c(OC)c(OC)c(OC)c1	40	%PPB	PPB	Zhu et al., 2013
219	mephenytoin	O=C1N(C)C(=O)NC1(CC)c1ccccc1	40	%PPB	PPB	Zhu et al., 2013
220	pinacidil	n1ccc(N\C(=N\C(C(C)(C)C)C)\NC#N)cc1	40	%PPB	PPB	Zhu et al., 2013
221	rimantadine	NC(C)C12CC3CC(C1)CC(C2)C3	40	%PPB	PPB	Zhu et al., 2013
222	rivastigmine	O(C(=O)N(CC)C)c1cc(ccc1)C(N(C)C)C	40	%PPB	PPB	Zhu et al., 2013
223	streptomycin	O1C(CO)C(O)C(O)C(NC)C1OC1C(O)(C=O)C(OC1OC1C(\N=C(\N)/N)C(O)C(\N=C(\N)/N)C(O)C1O)C	40	%PPB	PPB	Zhu et al., 2013
224	cabergoline	O=C(N(CCCN(C)C)C(=O)NCC)C1CC2C(N(C1)CC=C)Cc1c3c2cccc3[nH]c1	41	%PPB	PPB	Zhu et al., 2013
225	ibutilide	S(=O)(=O)(Nc1ccc(cc1)C(O)CCCN(CCCCCCC)CC)C	41	%PPB	PPB	Zhu et al., 2013
226	trimethoprim	O(C)c1c(OC)cc(cc1OC)Cc1cnc(nc1N)N	41.5	%PPB	PPB	Zhu et al., 2013
227	penicillin35	S1C2N(C(C(O)=O)C1(C)C)C(=O)C2NC(=O)C(NC(=O)c1ccc(S(=O)(=O)N)cc1)c1ccccc1	42	%PPB	PPB	Zhu et al., 2013
228	aclarubicin	O1C(C)C(OC2OC(C)C(OC3OC(C)C(=O)CC3)C(O)C2)C(N(C)C)CC1OC1CC(O)(CC)C(c2c1c(O)c1c(c2)C(=O)c2c(C1=O)c(O)ccc2)C(OC)=O	43	%PPB	PPB	Zhu et al., 2013
229	anastrozole	n1cn(nc1)Cc1cc(cc(c1)C(C#N)(C)C)C(C#N)(C)C	44	%PPB	PPB	Zhu et al., 2013
230	bambuterol	O(C(=O)N(C)C)c1cc(cc(OC(=O)N(C)C)c1)C(O)CNC(C)(C)C	45	%PPB	PPB	Zhu et al., 2013
231	lymecycline	OC12C(CC3C(=C1O)C(=O)c1c(cccc1O)C3(O)C)C(N(C)C)C(=O)C(C(=O)NCNCCCCC(N)C(O)=O)=C2O	45	%PPB	PPB	Zhu et al., 2013
232	mesalamine	Oc1ccc(N)cc1C(O)=O	45	%PPB	PPB	Zhu et al., 2013
233	moxalactam	S(CC=1COC2N(C(=O)C2(OC)NC(=O)C(C(O)=O)c2ccc(O)cc2)C=1C(O)=O)c1nnnn1C	45	%PPB	PPB	Zhu et al., 2013
234	oxcarbazepine	O=C1Cc2c(N(c3c1cccc3)C(=O)N)cccc2	45	%PPB	PPB	Zhu et al., 2013
235	vancomycin	Clc1c2Oc3cc4C(NC(=O)C(NC(=O)C(NC(=O)C(NC)CC(C)C)C(O)c(c1)cc2)CC(=O)N)C(=O)NC1c2cc(-c5c(cc(O)cc5O)C(NC(=O)C(NC1=O)C(O)c1cc(Cl)c(Oc(c4)c3OC3OC(CO)C(O)C(O)C3OC3OC(C)C(O)C(N)(C3)C)cc1)C(O)=O)c(O)cc2	45	%PPB	PPB	Zhu et al., 2013
236	eplerenone	O1C2(CCC1=O)CCC1C3C4(OC4CC12C)C1(C(CC3C(OC)=O)=CC(=O)CC1)C	46	%PPB	PPB	Zhu et al., 2013
237	leuprolide	Oc1ccc(cc1)CC(NC(=O)C(NC(=O)C(NC(=O)C(NC(=O)C1NC(=O)CC1)Cc1nc[nH]c1)Cc1c2c([nH]c1)cccc2)CO)C(=O)NC(CC(C)C)C(=O)NC(CC(C)C)C(=O)NC(CCC\N=C(\N)/N)C(=O)N1CCCC1C(=O)NCC	46	%PPB	PPB	Zhu et al., 2013
238	fenoterol	Oc1cc(cc(O)c1)C(O)CNC(Cc1ccc(O)cc1)C	47	%PPB	PPB	Zhu et al., 2013
239	beclamide	ClCCC(=O)NCc1ccccc1	47	%PPB	PPB	Zhu et al., 2013
240	penicillin8	S1C2N(C(C(O)=O)C1(C)C)C(=O)C2NC(=O)COC(CC)CC	47	%PPB	PPB	Zhu et al., 2013
241	pemoline	O1C(c2ccccc2)C(=O)N=C1N	50	%PPB	PPB	Zhu et al., 2013
242	abacavir	OCC1CC(n2c3nc(nc(NC4CC4)c3nc2)N)C=C1	50	%PPB	PPB	Zhu et al., 2013
243	acrivastine	OC(=O)\C=C\c1nc(ccc1)/C(=C\CN1CCCC1)/c1ccc(cc1)C	50	%PPB	PPB	Zhu et al., 2013
244	amobarbital	O=C1NC(=O)NC(=O)C1(CCC(C)C)CC	50	%PPB	PPB	Zhu et al., 2013
245	artemether	O1C2OC3(OOC24C(CCC(C4CC3)C)C(C)C1OC)C	50	%PPB	PPB	Zhu et al., 2013
246	atropine	O(C(=O)C(CO)c1ccccc1)C1CC2N(C(C1)CC2)C	50	%PPB	PPB	Zhu et al., 2013
247	carbenicillin	S1C2N(C(C(O)=O)C1(C)C)C(=O)C2NC(=O)C(C(O)=O)c1ccccc1	50	%PPB	PPB	Zhu et al., 2013
248	chlormezanone	Clc1ccc(cc1)C1S(=O)(=O)CCC(=O)N1C	50	%PPB	PPB	Zhu et al., 2013
249	chlortetracycline	Clc1c2c(C(=O)C=3C(CC4C(O)(C(O)=C(C(=O)N)C(=O)C4N(C)C)C=3O)C2(O)C)c(O)cc1	50	%PPB	PPB	Zhu et al., 2013
250	clenbuterol	Clc1cc(cc(Cl)c1N)C(O)CNC(C)(C)C	50	%PPB	PPB	Zhu et al., 2013
251	clopamide	Clc1ccc(cc1S(=O)(=O)N)C(=O)NN1C(CCCC1C)C	50	%PPB	PPB	Zhu et al., 2013
252	clotrimazole	Clc1ccccc1C(n1ccnc1)(c1ccccc1)c1ccccc1	50	%PPB	PPB	Zhu et al., 2013
253	disulfiram	S(SC(=S)N(CC)CC)C(=S)N(CC)CC	50	%PPB	PPB	Zhu et al., 2013
254	epinephrine	Oc1cc(ccc1O)C(O)CNC	50	%PPB	PPB	Zhu et al., 2013
255	flumazenil	Fc1cc2c(-n3c(CN(C)C2=O)c(nc3)C(OCC)=O)cc1	50	%PPB	PPB	Zhu et al., 2013
256	flunisolide	FC1C2=CC(=O)C=CC2(C2C(C3CC4OC(OC4(C(=O)CO)C3(CC2O)C)(C)C)C1)C	50	%PPB	PPB	Zhu et al., 2013
257	glutethimide	O=C1NC(=O)CCC1(CC)c1ccccc1	50	%PPB	PPB	Zhu et al., 2013
258	labetalol	Oc1ccc(cc1C(=O)N)C(O)CNC(CCc1ccccc1)C	50	%PPB	PPB	Zhu et al., 2013
259	mepindolol	O(CC(O)CNC(C)C)c1c2cc([nH]c2ccc1)C	50	%PPB	PPB	Zhu et al., 2013
260	methylphenobarbital	O=C1N(C)C(=O)NC(=O)C1(CC)c1ccccc1	50	%PPB	PPB	Zhu et al., 2013
261	mirtazapine	n1c2N3C(c4c(Cc2ccc1)cccc4)CN(CC3)C	50	%PPB	PPB	Zhu et al., 2013
262	moclobemide	Clc1ccc(cc1)C(=O)NCCN1CCOCC1	50	%PPB	PPB	Zhu et al., 2013
263	moxifloxacin	Fc1cc2c(N(C=C(C(O)=O)C2=O)C2CC2)c(OC)c1N1CC2C(NCCC2)C1	50	%PPB	PPB	Zhu et al., 2013
264	norepinephrine	Oc1cc(ccc1O)C(O)CN	50	%PPB	PPB	Zhu et al., 2013
265	prilocaine	O=C(Nc1ccccc1C)C(NCCC)C	50	%PPB	PPB	Zhu et al., 2013
266	procyclidine	OC(CCN1CCCC1)(C1CCCCC1)c1ccccc1	50	%PPB	PPB	Zhu et al., 2013
267	quinalbarbitone	O=C1NC(=O)NC(=O)C1(C(CCC)C)CC=C	50	%PPB	PPB	Zhu et al., 2013
268	sulfapyridine	S(=O)(=O)(Nc1ncccc1)c1ccc(N)cc1	50	%PPB	PPB	Zhu et al., 2013
269	tetracycline	OC12C(CC3C(=C1O)C(=O)c1c(cccc1O)C3(O)C)C(N(C)C)C(=O)C(C(=O)N)=C2O	50	%PPB	PPB	Zhu et al., 2013
270	toloxatone	O1C(CN(c2cc(ccc2)C)C1=O)CO	50	%PPB	PPB	Zhu et al., 2013
271	zoniporide	O=C(NC(N)=N)c1cnn(c1C1CC1)-c1c2c(nccc2)ccc1	50	%PPB	PPB	Zhu et al., 2013
272	pentobarbital	O=C1NC(=O)NC(=O)C1(C(CCC)C)CC	51	%PPB	PPB	Zhu et al., 2013
273	flecainide	FC(F)(F)COc1ccc(OCC(F)(F)F)cc1C(=O)NCC1NCCCC1	52	%PPB	PPB	Zhu et al., 2013
274	betaxolol	O(CC(O)CNC(C)C)c1ccc(cc1)CCOCC1CC1	53	%PPB	PPB	Zhu et al., 2013
275	dalfopristin	S(=O)(=O)(CCN(CC)CC)C1C23N(CC1)C(=O)C=1N2C(OC=1)CC(=O)CC(O)\C=C(/C=C\CNC(=O)\C=C/C(C)C(OC3=O)C(C)C)\C	53	%PPB	PPB	Zhu et al., 2013
276	methotrexate	OC(=O)C(NC(=O)c1ccc(N(Cc2nc3c(nc(nc3N)N)nc2)C)cc1)CCC(O)=O	53	%PPB	PPB	Zhu et al., 2013
277	penicillin37	S1C2N(C(C(O)=O)C1(C)C)C(=O)C2NC(=O)C(O)c1ccccc1	53.2	%PPB	PPB	Zhu et al., 2013
278	pindolol	O(CC(O)CNC(C)C)c1c2c([nH]cc2)ccc1	54	%PPB	PPB	Zhu et al., 2013
279	chlorobutanol	ClC(Cl)(Cl)C(O)(C)C	55	%PPB	PPB	Zhu et al., 2013
280	enalapril	O(C(=O)C(NC(C(=O)N1CCCC1C(O)=O)C)CCc1ccccc1)CC	55	%PPB	PPB	Zhu et al., 2013
281	esmolol	O(CC(O)CNC(C)C)c1ccc(cc1)CCC(OC)=O	55	%PPB	PPB	Zhu et al., 2013
282	lamotrigine	Clc1c(cccc1Cl)-c1nnc(nc1N)N	55	%PPB	PPB	Zhu et al., 2013
283	methazolamide	S1\C(=N/C(=O)C)\N(N=C1S(=O)(=O)N)C	55	%PPB	PPB	Zhu et al., 2013
284	aztreonam	s1cc(nc1N)/C(=N/OC(C(O)=O)(C)C)/C(=O)NC1C(N(S(O)(=O)=O)C1=O)C	56	%PPB	PPB	Zhu et al., 2013
285	chloramphenicol	ClC(Cl)C(=O)NC(C(O)c1ccc([N+](=O)[O-])cc1)CO	56	%PPB	PPB	Zhu et al., 2013
286	citalopram	Fc1ccc(cc1)C1(OCc2c1ccc(c2)C#N)CCCN(C)C	56	%PPB	PPB	Zhu et al., 2013
287	penicillin76	S1C2N(C(C(O)=O)C1(C)C)C(=O)C2NC(=O)c1c2c(ncc1OC)cccc2	57	%PPB	PPB	Zhu et al., 2013
288	theophylline	O=C1N(C)C(=O)N(c2[nH]cnc12)C	57	%PPB	PPB	Zhu et al., 2013
289	carisoprodol	O(CC(CCC)(COC(=O)N)C)C(=O)NC(C)C	58	%PPB	PPB	Zhu et al., 2013
290	cefatrizine	S1C2N(C(=O)C2NC(=O)C(N)c2ccc(O)cc2)C(C(O)=O)=C(C1)CSc1nn[nH]c1	58	%PPB	PPB	Zhu et al., 2013
291	meperidine	O(C(=O)C1(CCN(CC1)C)c1ccccc1)CC	58	%PPB	PPB	Zhu et al., 2013
292	penicillin71	S1C2N(C(C(O)=O)C1(C)C)C(=O)C2NC(=O)Cc1sccc1	58	%PPB	PPB	Zhu et al., 2013
293	penicillin7	S1C2N(C(C(O)=O)C1(C)C)C(=O)C2NC(=O)COCCCC	58.8	%PPB	PPB	Zhu et al., 2013
294	penicillin73	S1C2N(C(C(O)=O)C1(C)C)C(=O)C2NC(=O)CC(OC)c1sccc1	59	%PPB	PPB	Zhu et al., 2013
295	chloroquine	Clc1cc2nccc(NC(CCCN(CC)CC)C)c2cc1	60	%PPB	PPB	Zhu et al., 2013
296	cyclizine	N1(CCN(CC1)C)C(c1ccccc1)c1ccccc1	60	%PPB	PPB	Zhu et al., 2013
297	dipyrone	S(O)(=O)(=O)CN(C)C=1C(=O)N(N(C)C=1C)c1ccccc1	60	%PPB	PPB	Zhu et al., 2013
298	ethchlorvynol	Cl\C=C\C(O)(CC)C#C	60	%PPB	PPB	Zhu et al., 2013
299	indinavir	OC1Cc2c(cccc2)C1NC(=O)C(Cc1ccccc1)CC(O)CN1CCN(CC1C(=O)NC(C)(C)C)Cc1cccnc1	60	%PPB	PPB	Zhu et al., 2013
300	lofexidine	Clc1cccc(Cl)c1OC(C)C=1NCCN=1	60	%PPB	PPB	Zhu et al., 2013
301	methyprylon	O=C1C(CC)(CC)C(=O)NCC1C	60	%PPB	PPB	Zhu et al., 2013
302	modafinil	S(=O)(C(c1ccccc1)c1ccccc1)CC(=O)N	60	%PPB	PPB	Zhu et al., 2013
303	nevirapine	O=C1Nc2c(nccc2C)N(c2ncccc12)C1CC1	60	%PPB	PPB	Zhu et al., 2013
304	perindopril	O(C(=O)C(NC(C(=O)N1C2C(CC1C(O)=O)CCCC2)C)CCC)CC	60	%PPB	PPB	Zhu et al., 2013
305	prajmaline	OC1[N+]2(C3C4C(CC2C2N(c5c(C2(C3)C4O)cccc5)C)C1CC)CCC	60	%PPB	PPB	Zhu et al., 2013
306	riboflavin	O=C1NC(=O)N=C2N(c3cc(C)c(cc3N=C12)C)CC(O)C(O)C(O)CO	60	%PPB	PPB	Zhu et al., 2013
307	zaleplon	O=C(N(CC)c1cc(ccc1)C=1n2ncc(c2N=CC=1)C#N)C	60	%PPB	PPB	Zhu et al., 2013
308	ramipril	O(C(=O)C(NC(C(=O)N1C2C(CC1C(O)=O)CCC2)C)CCc1ccccc1)CC	61	%PPB	PPB	Zhu et al., 2013
309	triamterene	n1c(N)c2nc(-c3ccccc3)c(nc2nc1N)N	61	%PPB	PPB	Zhu et al., 2013
310	penicillin77	S1C2N(C(C(O)=O)C1(C)C)C(=O)C2NC(=O)c1c2c(nc(C)c1OC)cccc2	61.7	%PPB	PPB	Zhu et al., 2013
311	4-aminosalicylic acid	Oc1cc(N)ccc1C(O)=O	62	%PPB	PPB	Zhu et al., 2013
312	alosetron	O=C1N(CCc2n(c3c(c12)cccc3)C)Cc1nc[nH]c1C	62	%PPB	PPB	Zhu et al., 2013
313	cephapirin	S1C2N(C(=O)C2NC(=O)CSc2ccncc2)C(C(O)=O)=C(C1)COC(=O)C	62	%PPB	PPB	Zhu et al., 2013
314	formoterol	O(C)c1ccc(cc1)CC(NCC(O)c1cc(NC=O)c(O)cc1)C	62	%PPB	PPB	Zhu et al., 2013
315	palonosetron	O=C1N(CC2CCCc3c2c1ccc3)C1C2CCN(C1)CC2	62	%PPB	PPB	Zhu et al., 2013
316	pentazocine	Oc1cc2c(CC3N(CCC2(C)C3C)C\C=C(\C)/C)cc1	62	%PPB	PPB	Zhu et al., 2013
317	penicillin36	S1C2N(C(C(O)=O)C1(C)C)C(=O)C2NC(=O)C(NC(=O)c1ncccc1)c1ccccc1	63	%PPB	PPB	Zhu et al., 2013
318	chlormethiazole	ClCCc1scnc1C	64	%PPB	PPB	Zhu et al., 2013
319	cinoxacin	O1c2c(OC1)cc1N(N=C(C(O)=O)C(=O)c1c2)CC	64	%PPB	PPB	Zhu et al., 2013
320	ceftibuten	s1cc(nc1N)/C(=N/CC(O)=O)/C(=O)NC1C2SCC=C(N2C1=O)C(O)=O	65	%PPB	PPB	Zhu et al., 2013
321	dofetilide	S(=O)(=O)(Nc1ccc(cc1)CCN(CCOc1ccc(NS(=O)(=O)C)cc1)C)C	65	%PPB	PPB	Zhu et al., 2013
322	granisetron	O=C(NC1CC2N(C(C1)CCC2)C)c1nn(c2c1cccc2)C	65	%PPB	PPB	Zhu et al., 2013
323	methylenedioxymethamphetamine	O1c2cc(ccc2OC1)CC(NC)C	65	%PPB	PPB	Zhu et al., 2013
324	penicillin-G	S1C2N(C(C(O)=O)C1(C)C)C(=O)C2NC(=O)Cc1ccccc1	65	%PPB	PPB	Zhu et al., 2013
325	aniracetam	O(C)c1ccc(cc1)C(=O)N1CCCC1=O	66	%PPB	PPB	Zhu et al., 2013
326	irinotecan	O1CC2=C(C=C3N(Cc4c3nc3c(cc(OC(=O)N5CCC(N6CCCCC6)CC5)cc3)c4CC)C2=O)C(O)(CC)C1=O	66	%PPB	PPB	Zhu et al., 2013
327	methysergide	OCC(NC(=O)C1C=C2C(N(C1)C)Cc1c3c2cccc3n(c1)C)CC	66	%PPB	PPB	Zhu et al., 2013
328	carbendazim	O(C(=O)Nc1[nH]c2c(n1)cccc2)C	67	%PPB	PPB	Zhu et al., 2013
329	cefixime	s1cc(nc1N)/C(=N/OCC(O)=O)/C(=O)NC1C2SCC(C=C)=C(N2C1=O)C(O)=O	67	%PPB	PPB	Zhu et al., 2013
330	lidocaine	O=C(Nc1c(cccc1C)C)CN(CC)CC	67	%PPB	PPB	Zhu et al., 2013
331	nomifensine	Nc1c2c(ccc1)C(CN(C2)C)c1ccccc1	67	%PPB	PPB	Zhu et al., 2013
332	quinupristin	S(CC1CN2C(CC1=O)C(=O)NC(c1ccccc1)C(OC(C)C(NC(=O)c1ncccc1O)C(=O)NC(CC)C(=O)N1C(CCC1)C(=O)N(C)C(Cc1ccc(N(C)C)cc1)C2=O)=O)C1C2CCN(C1)CC2	67	%PPB	PPB	Zhu et al., 2013
333	sulfathiazole	s1ccnc1NS(=O)(=O)c1ccc(N)cc1	67	%PPB	PPB	Zhu et al., 2013
334	hydrochlorothiazide	Clc1cc2NCNS(=O)(=O)c2cc1S(=O)(=O)N	67.9	%PPB	PPB	Zhu et al., 2013
335	betamethasone	FC12C(C3CC(C)C(O)(C(=O)CO)C3(CC1O)C)CCC1=CC(=O)C=CC12C	68	%PPB	PPB	Zhu et al., 2013
336	cephalothin	s1cccc1CC(=O)NC1C2SCC(COC(=O)C)=C(N2C1=O)C(O)=O	68	%PPB	PPB	Zhu et al., 2013
337	cromolyn	O1c2c(C(=O)C=C1C(O)=O)c(OCC(O)COc1c3c(OC(=CC3=O)C(O)=O)ccc1)ccc2	68	%PPB	PPB	Zhu et al., 2013
338	isoproterenol	Oc1cc(ccc1O)C(O)CNC(C)C	68	%PPB	PPB	Zhu et al., 2013
339	penicillin19	S1C2N(C(C(O)=O)C1(C)C)C(=O)C2NC(=O)C(C)c1ccccc1	68	%PPB	PPB	Zhu et al., 2013
340	rapacuronium	O(C(=O)CC)C1C2(C(CC1[N+]1(CCCCC1)CC=C)C1C(CC2)C2(CC(N3CCCCC3)C(OC(=O)C)CC2CC1)C)C	68	%PPB	PPB	Zhu et al., 2013
341	penicillin78	S1C2N(C(C(O)=O)C1(C)C)C(=O)C2NC(=O)c1c2c(ncc1OCC)cccc2	69.7	%PPB	PPB	Zhu et al., 2013
342	bromazepam	Brc1cc2c(NC(=O)CN=C2c2ncccc2)cc1	70	%PPB	PPB	Zhu et al., 2013
343	cefmetazole	S1C2N(C(=O)C2NC(=O)CSCC#N)C(C(O)=O)=C(C1)CSc1nnnn1C	70	%PPB	PPB	Zhu et al., 2013
344	chlorothiazide	Clc1cc2NC=NS(=O)(=O)c2cc1S(=O)(=O)N	70	%PPB	PPB	Zhu et al., 2013
345	cyclobarbital	O=C1NC(=O)NC(=O)C1(CC)C=1CCCCC=1	70	%PPB	PPB	Zhu et al., 2013
346	dolasetron	O(C(=O)c1c2c([nH]c1)cccc2)C1CC2N3CC(=O)C(C2)CC3C1	70	%PPB	PPB	Zhu et al., 2013
347	folic acid	Oc1nc(nc2ncc(nc12)CNc1ccc(cc1)C(=O)NC(CCC(O)=O)C(O)=O)N	70	%PPB	PPB	Zhu et al., 2013
348	imatinib	O=C(Nc1cc(Nc2nc(ccn2)-c2cccnc2)c(cc1)C)c1ccc(cc1)CN1CCN(CC1)C	70	%PPB	PPB	Zhu et al., 2013
349	lisuride	O=C(NC1C=C2C(N(C1)C)Cc1c3c2cccc3[nH]c1)N(CC)CC	70	%PPB	PPB	Zhu et al., 2013
350	N-desmethyl-imatinib	O=C(Nc1cc(Nc2nc(ccn2)-c2cccnc2)c(cc1)C)c1ccc(cc1)CN1CCNCC1	70	%PPB	PPB	Zhu et al., 2013
351	pentamidine	O(CCCCCOc1ccc(cc1)C(N)=N)c1ccc(cc1)C(N)=N	70	%PPB	PPB	Zhu et al., 2013
352	sulfamoxole	S(=O)(=O)(Nc1oc(C)c(n1)C)c1ccc(N)cc1	70	%PPB	PPB	Zhu et al., 2013
353	tropisetron	O(C(=O)c1c2c([nH]c1)cccc2)C1CC2N(C(C1)CC2)C	70	%PPB	PPB	Zhu et al., 2013
354	chlorpheniramine	Clc1ccc(cc1)C(CCN(C)C)c1ncccc1	70	%PPB	PPB	Zhu et al., 2013
355	brompheniramine	Brc1ccc(cc1)C(CCN(C)C)c1ncccc1	72	%PPB	PPB	Zhu et al., 2013
356	phencyclidine	N1(CCCCC1)C1(CCCCC1)c1ccccc1	72	%PPB	PPB	Zhu et al., 2013
357	sulfametopyrazine	S(=O)(=O)(Nc1nccnc1OC)c1ccc(N)cc1	72	%PPB	PPB	Zhu et al., 2013
358	milrinone	Oc1nc(C)c(cc1C#N)-c1ccncc1	73	%PPB	PPB	Zhu et al., 2013
359	nefopam	O1CCN(Cc2c(cccc2)C1c1ccccc1)C	73	%PPB	PPB	Zhu et al., 2013
360	alprazolam	Clc1cc2c(-n3c(nnc3C)CN=C2c2ccccc2)cc1	74	%PPB	PPB	Zhu et al., 2013
361	cefamandole	S1C2N(C(=O)C2NC(=O)C(O)c2ccccc2)C(C(O)=O)=C(C1)CSc1nnnn1C	74	%PPB	PPB	Zhu et al., 2013
362	ondansetron	O=C1c2c(n(c3c2cccc3)C)CCC1Cn1ccnc1C	74	%PPB	PPB	Zhu et al., 2013
363	penicillin10	S1C2N(C(C(O)=O)C1(C)C)C(=O)C2NC(=O)C(OCC)CCCC	74	%PPB	PPB	Zhu et al., 2013
364	penicillin79	S1C2N(C(C(O)=O)C1(C)C)C(=O)C2NC(=O)c1c2c(nc(C)c1OCC)cccc2	74.5	%PPB	PPB	Zhu et al., 2013
365	carbamazepine	O=C(N)N1c2c(C=Cc3c1cccc3)cccc2	75	%PPB	PPB	Zhu et al., 2013
366	chlorthalidone	Clc1ccc(cc1S(=O)(=O)N)C1(O)NC(=O)c2c1cccc2	75	%PPB	PPB	Zhu et al., 2013
367	doxorubicin	O1C(C)C(O)C(N)CC1OC1CC(O)(Cc2c1c(O)c1c(C(=O)c3c(C1=O)c(OC)ccc3)c2O)C(=O)CO	75	%PPB	PPB	Zhu et al., 2013
368	etomidate	O(C(=O)c1n(cnc1)C(C)c1ccccc1)CC	75	%PPB	PPB	Zhu et al., 2013
369	fludrocortisone	FC12C(C3CCC(O)(C(=O)CO)C3(CC1O)C)CCC1=CC(=O)CCC12C	75	%PPB	PPB	Zhu et al., 2013
370	hydroflumethiazide	S(=O)(=O)(N)c1cc2S(=O)(=O)NCNc2cc1C(F)(F)F	75	%PPB	PPB	Zhu et al., 2013
371	iotroxate	Ic1c(NC(=O)COCCOCCOCC(=O)Nc2c(C(O)=O)c(I)cc(I)c2I)c(C(O)=O)c(I)cc1I	75	%PPB	PPB	Zhu et al., 2013
372	mebeverine	O(C)c1cc(ccc1OC)C(OCCCCN(C(Cc1ccc(OC)cc1)C)CC)=O	75	%PPB	PPB	Zhu et al., 2013
373	minocycline	OC12C(CC3C(C1=O)=C(O)c1c(C3)c(N(C)C)ccc1O)C(N(C)C)C(=O)C(C(=O)N)=C2O	75	%PPB	PPB	Zhu et al., 2013
374	pentamethylmelamine	n1c(nc(nc1N(C)C)NC)N(C)C	75	%PPB	PPB	Zhu et al., 2013
375	prednisone	OC1(CCC2C3C(C4(C(=CC(=O)C=C4)CC3)C)C(=O)CC12C)C(=O)CO	75	%PPB	PPB	Zhu et al., 2013
376	propanidid	O(CC(=O)N(CC)CC)c1ccc(cc1OC)CC(OCCC)=O	75	%PPB	PPB	Zhu et al., 2013
377	remoxipride	Brc1ccc(OC)c(C(=O)NCC2N(CCC2)CC)c1OC	75	%PPB	PPB	Zhu et al., 2013
378	rifampin	O1c2c3c4c(c(O)c2C)c(O)c(NC(=O)/C(=C\C=C\C(C)C(O)C(C)C(O)C(C)C(OC(=O)C)C(C)C(OC)\C=C\OC1(C)C3=O)/C)c(\C=N\N1CCN(CC1)C)c4O	75	%PPB	PPB	Zhu et al., 2013
379	tiotropium	s1cccc1C(O)(C(OC1CC2[N+](C(C1)C1OC12)(C)C)=O)c1sccc1	75	%PPB	PPB	Zhu et al., 2013
380	bupropion	Clc1cc(ccc1)C(=O)C(NC(C)(C)C)C	75	%PPB	PPB	Zhu et al., 2013
381	indapamide	Clc1ccc(cc1S(=O)(=O)N)C(=O)NN1c2c(CC1C)cccc2	76	%PPB	PPB	Zhu et al., 2013
382	lincomycin	S(C)C1OC(C(NC(=O)C2N(CC(C2)CCC)C)C(O)C)C(O)C(O)C1O	76	%PPB	PPB	Zhu et al., 2013
383	carmustine	ClCCN(N=O)C(=O)NCCCl	77	%PPB	PPB	Zhu et al., 2013
384	fluvoxamine	FC(F)(F)c1ccc(cc1)/C(=N/OCCN)/CCCCOC	77	%PPB	PPB	Zhu et al., 2013
385	methylprednisolone	OC1(CCC2C3C(C4(C(=CC(=O)C=C4)C(C3)C)C)C(O)CC12C)C(=O)CO	77	%PPB	PPB	Zhu et al., 2013
386	oxprenolol	O(CC(O)CNC(C)C)c1ccccc1OCC=C	77	%PPB	PPB	Zhu et al., 2013
387	penicillin18	S1C2N(C(C(O)=O)C1(C)C)C(=O)C2NC(=O)Cc1c(OC)cccc1OC	77	%PPB	PPB	Zhu et al., 2013
388	diphenhydramine	O(C(c1ccccc1)c1ccccc1)CCN(C)C	78	%PPB	PPB	Zhu et al., 2013
389	enoximone	S(C)c1ccc(cc1)C(=O)c1[nH]c(O)nc1C	78	%PPB	PPB	Zhu et al., 2013
390	penicillin22	ClC(C(=O)NC1C2SC(C)(C)C(N2C1=O)C(O)=O)c1ccccc1	78	%PPB	PPB	Zhu et al., 2013
391	roxithromycin	O1C(CC)C(O)(C)C(O)C(C)\C(=N/OCOCCOC)\C(CC(O)(C)C(OC2OC(CC(N(C)C)C2O)C)C(C)C(OC2OC(C)C(O)C(OC)(C2)C)C(C)C1=O)C	78	%PPB	PPB	Zhu et al., 2013
392	alendronic acid	P(O)(O)(=O)C(P(O)(O)=O)(O)CCCN	79	%PPB	PPB	Zhu et al., 2013
393	diaziquone	O=C1C(N2CC2)=C(NC(OCC)=O)C(=O)C(N2CC2)=C1NC(OCC)=O	79	%PPB	PPB	Zhu et al., 2013
394	iopanoic acid	Ic1c(CC(CC)C(O)=O)c(I)cc(I)c1N	79	%PPB	PPB	Zhu et al., 2013
395	acetyldigitoxin	O1C(C)C(OC2OC(C)C(O)C(OC(=O)C)C2)C(O)CC1OC1C(OC(OC2CC3CCC4C(CCC5(C)C(CCC45O)C4=CC(OC4)=O)C3(CC2)C)CC1O)C	80	%PPB	PPB	Zhu et al., 2013
396	adrafinil	S(=O)(C(c1ccccc1)c1ccccc1)CC(=O)NO	80	%PPB	PPB	Zhu et al., 2013
397	alprenolol	O(CC(O)CNC(C)C)c1ccccc1CC=C	80	%PPB	PPB	Zhu et al., 2013
398	azidocillin	S1C2N(C(C(O)=O)C1(C)C)C(=O)C2NC(=O)C(N=[N+]=[N-])c1ccccc1	80	%PPB	PPB	Zhu et al., 2013
399	butorphanol	OC12C3(CCCC1)CCN(C2Cc1c3cc(O)cc1)CC1CCC1	80	%PPB	PPB	Zhu et al., 2013
400	cloprednol	ClC=1C2=CC(=O)C=CC2(C2C(C3CCC(O)(C(=O)CO)C3(CC2O)C)C=1)C	80	%PPB	PPB	Zhu et al., 2013
401	fentanyl	O=C(N(C1CCN(CC1)CCc1ccccc1)c1ccccc1)CC	80	%PPB	PPB	Zhu et al., 2013
402	flupirtine	Fc1ccc(cc1)CNc1nc(N)c(NC(OCC)=O)cc1	80	%PPB	PPB	Zhu et al., 2013
403	glymidine	S(=O)(=O)(Nc1ncc(OCCOC)cn1)c1ccccc1	80	%PPB	PPB	Zhu et al., 2013
404	griseofulvin	Clc1c2OC3(C(CC(=O)C=C3OC)C)C(=O)c2c(OC)cc1OC	80	%PPB	PPB	Zhu et al., 2013
405	ketotifen	s1c2c(cc1)\C(\c1c(CC2=O)cccc1)=C\1/CCN(CC/1)C	80	%PPB	PPB	Zhu et al., 2013
406	nedocromil	O1c2c(cc3c(N(CC)C(=CC3=O)C(O)=O)c2CCC)C(=O)C=C1C(O)=O	80	%PPB	PPB	Zhu et al., 2013
407	penicillin67	S1C2N(C(C(O)=O)C1(C)C)C(=O)C2NC(=O)c1c2c(ccc1OC)cccc2	80	%PPB	PPB	Zhu et al., 2013
408	penicillin-V	S1C2N(C(C(O)=O)C1(C)C)C(=O)C2NC(=O)COc1ccccc1	80	%PPB	PPB	Zhu et al., 2013
409	phenoperidine	O(C(=O)C1(CCN(CC1)CCC(O)c1ccccc1)c1ccccc1)CC	80	%PPB	PPB	Zhu et al., 2013
410	primaquine	O(C)c1cc(NC(CCCN)C)c2ncccc2c1	80	%PPB	PPB	Zhu et al., 2013
411	propylthiouracil	Sc1nc(cc(O)n1)CCC	80	%PPB	PPB	Zhu et al., 2013
412	urapidil	O(C)c1ccccc1N1CCN(CC1)CCCNC=1N(C)C(=O)N(C)C(=O)C=1	80	%PPB	PPB	Zhu et al., 2013
413	cefodizime	s1c(SCC=2CSC3N(C(=O)C3NC(=O)\C(=N/OC)\c3nc(sc3)N)C=2C(O)=O)c(nc1CC(O)=O)C	81	%PPB	PPB	Zhu et al., 2013
414	ceforanide	S1C2N(C(=O)C2NC(=O)Cc2ccccc2CN)C(C(O)=O)=C(C1)CSc1nnnn1CC(O)=O	81	%PPB	PPB	Zhu et al., 2013
415	penicillin54	S1C2N(C(C(O)=O)C1(C)C)C(=O)C2NC(=O)COc1ccc(F)cc1	81.5	%PPB	PPB	Zhu et al., 2013
416	atracurium	O(C)c1cc(ccc1OC)CC1[N+](CCc2c1cc(OC)c(OC)c2)(CCC(OCCCCCOC(=O)CC[N+]1(CCc2c(cc(OC)c(OC)c2)C1Cc1cc(OC)c(OC)cc1)C)=O)C	82	%PPB	PPB	Zhu et al., 2013
417	indoramin	O=C(NC1CCN(CC1)CCc1c2c([nH]c1)cccc2)c1ccccc1	82	%PPB	PPB	Zhu et al., 2013
418	rifabutin	O1c2c3c4c(c(O)c2C)C(O)=C(NC(=O)/C(=C\C=C\C(C)C(O)C(C)C(O)C(C)C(OC(=O)C)C(C)C(OC)\C=C\OC1(C)C3=O)/C)C1=NC2(N=C14)CCN(CC2)CC(C)C	82	%PPB	PPB	Zhu et al., 2013
419	sulfacetamide	S(=O)(=O)(NC(=O)C)c1ccc(N)cc1	82	%PPB	PPB	Zhu et al., 2013
420	penicillin66	S1C2N(C(C(O)=O)C1(C)C)C(=O)C2NC(=O)c1c2c(ccc1C)cccc2	82.1	%PPB	PPB	Zhu et al., 2013
421	penicillin29	Clc1cc(ccc1Cl)C(N)C(=O)NC1C2SC(C)(C)C(N2C1=O)C(O)=O	82.2	%PPB	PPB	Zhu et al., 2013
422	penicillin21	BrC(C(=O)NC1C2SC(C)(C)C(N2C1=O)C(O)=O)c1ccccc1	82.5	%PPB	PPB	Zhu et al., 2013
423	thiopental	S=C1NC(=O)C(C(CCC)C)(CC)C(=O)N1	82.5	%PPB	PPB	Zhu et al., 2013
424	cefotetan	S1\C(\SC1C(=O)NC1(OC)C2SCC(CSc3nnnn3C)=C(N2C1=O)C(O)=O)=C(/C(=O)N)\C(O)=O	83	%PPB	PPB	Zhu et al., 2013
425	erythromycin	O1C(CC)C(O)(C)C(O)C(C)C(=O)C(CC(O)(C)C(OC2OC(CC(N(C)C)C2O)C)C(C)C(OC2OC(C)C(O)C(OC)(C2)C)C(C)C1=O)C	83	%PPB	PPB	Zhu et al., 2013
426	methoxsalen	O1c2c(C=CC1=O)cc1c(occ1)c2OC	83	%PPB	PPB	Zhu et al., 2013
427	penicillin44	Clc1ccc(cc1F)C(OC)C(=O)NC1C2SC(C)(C)C(N2C1=O)C(O)=O	83	%PPB	PPB	Zhu et al., 2013
428	quetiapine	S1c2c(cccc2)C(=Nc2c1cccc2)N1CCN(CC1)CCOCCO	83	%PPB	PPB	Zhu et al., 2013
429	sulfametoxydiazine	S(=O)(=O)(Nc1ncc(OC)cn1)c1ccc(N)cc1	83	%PPB	PPB	Zhu et al., 2013
430	penicillin53	S1C2N(C(C(O)=O)C1(C)C)C(=O)C2NC(=O)COc1cc(F)ccc1	83.5	%PPB	PPB	Zhu et al., 2013
431	penicillin75	Clc1sc(cc1)C(OC)CC(=O)NC1C2SC(C)(C)C(N2C1=O)C(O)=O	83.6	%PPB	PPB	Zhu et al., 2013
432	formestane	OC1=C2CCC3C4CCC(=O)C4(CCC3C2(CCC1=O)C)C	84	%PPB	PPB	Zhu et al., 2013
433	mepivacaine	O=C(Nc1c(cccc1C)C)C1N(CCCC1)C	84	%PPB	PPB	Zhu et al., 2013
434	oxybutynin	O(C(=O)C(O)(C1CCCCC1)c1ccccc1)CC#CCN(CC)CC	84	%PPB	PPB	Zhu et al., 2013
435	penicillin41	Clc1cccc(Cl)c1C(OC)C(=O)NC1C2SC(C)(C)C(N2C1=O)C(O)=O	84	%PPB	PPB	Zhu et al., 2013
436	penicillin61	S1C2N(C(C(O)=O)C1(C)C)C(=O)C2NC(=O)C(Oc1cc(F)ccc1)C	84	%PPB	PPB	Zhu et al., 2013
437	terfenadine	OC(C1CCN(CC1)CCCC(O)c1ccc(cc1)C(C)(C)C)(c1ccccc1)c1ccccc1	84	%PPB	PPB	Zhu et al., 2013
438	trandolapril	O(C(=O)C(NC(C(=O)N1C2C(CC1C(O)=O)CCCC2)C)CCc1ccccc1)CC	84	%PPB	PPB	Zhu et al., 2013
439	2-butyl-4-hydroxyanisole	O(C)c1ccc(O)cc1C(C)(C)C	85	%PPB	PPB	Zhu et al., 2013
440	cefazolin	S1C(=NN=C1SCC1CSC2N(C(=O)C2NC(=O)Cn2nnnc2)C=1C(O)=O)C	85	%PPB	PPB	Zhu et al., 2013
441	chlorguanide	Clc1ccc(N\C(=N\C(=N\C(C)C)\N)\N)cc1	85	%PPB	PPB	Zhu et al., 2013
442	dothiepin	S1Cc2c(cccc2)\C(\c2c1cccc2)=C\CCN(C)C	85	%PPB	PPB	Zhu et al., 2013
443	floctafenine	FC(F)(F)c1c2nccc(Nc3ccccc3C(OCC(O)CO)=O)c2ccc1	85	%PPB	PPB	Zhu et al., 2013
444	fluorescein	O1C2=CC(=O)C=CC2=C(c2c1cc(O)cc2)c1ccccc1C(O)=O	85	%PPB	PPB	Zhu et al., 2013
445	lorcainide	Clc1ccc(N(C(=O)Cc2ccccc2)C2CCN(CC2)C(C)C)cc1	85	%PPB	PPB	Zhu et al., 2013
446	lormetazepam	Clc1ccccc1C1=NC(O)C(=O)N(c2c1cc(Cl)cc2)C	85	%PPB	PPB	Zhu et al., 2013
447	methaqualone	O=C1N(c2ccccc2C)C(=Nc2c1cccc2)C	85	%PPB	PPB	Zhu et al., 2013
448	misoprostol	OC1CC(=O)C(CCCCCCC(OC)=O)C1\C=C\CC(O)(CCCC)C	85	%PPB	PPB	Zhu et al., 2013
449	mitozantrone	Oc1c2c(C(=O)c3c(C2=O)c(NCCNCCO)ccc3NCCNCCO)c(O)cc1	85	%PPB	PPB	Zhu et al., 2013
450	pentaerithrityl-tetranitrate	O([N+](=O)[O-])CC(CO[N+](=O)[O-])(CO[N+](=O)[O-])CO[N+](=O)[O-]	85	%PPB	PPB	Zhu et al., 2013
451	polythiazide	Clc1cc2NC(N(S(=O)(=O)c2cc1S(N)(=[CH2])=[CH2])C)CSCC(F)(F)F	85	%PPB	PPB	Zhu et al., 2013
452	promethazine	S1c2c(N(c3c1cccc3)CC(N(C)C)C)cccc2	85	%PPB	PPB	Zhu et al., 2013
453	proscillaridin	O1C(C)C(O)C(O)C(O)C1OC1CCC2(C3C(CCC2=C1)C1(O)CCC(C1(CC3)C)C=1C=CC(OC=1)=O)C	85	%PPB	PPB	Zhu et al., 2013
454	salicylate	Oc1ccccc1C(O)=O	85	%PPB	PPB	Zhu et al., 2013
455	sulfadimidine	S(=O)(=O)(Nc1nc(cc(n1)C)C)c1ccc(N)cc1	85	%PPB	PPB	Zhu et al., 2013
456	sulfamerazine	S(=O)(=O)(Nc1nc(ccn1)C)c1ccc(N)cc1	85	%PPB	PPB	Zhu et al., 2013
457	terodiline	N(C(C)(C)C)C(CC(c1ccccc1)c1ccccc1)C	85	%PPB	PPB	Zhu et al., 2013
458	tetrabenazine	O(C)c1cc2C3N(CC(CC(C)C)C(=O)C3)CCc2cc1OC	85	%PPB	PPB	Zhu et al., 2013
459	tetracaine	O(C(=O)c1ccc(NCCCC)cc1)CCN(C)C	85	%PPB	PPB	Zhu et al., 2013
460	trimeprazine	S1c2c(N(c3c1cccc3)CC(CN(C)C)C)cccc2	85	%PPB	PPB	Zhu et al., 2013
461	Atazanavir	O(C(=O)NC(C(C)(C)C)C(=O)NC(Cc1ccccc1)C(O)CN(NC(=O)C(NC(OC)=O)C(C)(C)C)Cc1ccc(cc1)-c1ncccc1)C	86	%PPB	PPB	Zhu et al., 2013
462	desipramine	N(CCCN1c2c(CCc3c1cccc3)cccc2)C	86	%PPB	PPB	Zhu et al., 2013
463	hydralazine	n1ncc2c(cccc2)c1NN	86	%PPB	PPB	Zhu et al., 2013
464	penicillin64	S1C2N(C(C(O)=O)C1(C)C)C(=O)C2NC(=O)c1c2c(ccc1)cccc2	86	%PPB	PPB	Zhu et al., 2013
465	trovafloxacin	Fc1cc(F)ccc1N1C=C(C(O)=O)C(=O)c2cc(F)c(nc12)N1CC2C(C1)C2N	86	%PPB	PPB	Zhu et al., 2013
466	vinblastine	O(C(=O)C)C1C2(C3N(CCC34C(N(c3cc(OC)c(cc34)C3(CC4CC(O)(CN(C4)CCc4c3[nH]c3c4cccc3)CC)C(OC)=O)C)C1(O)C(OC)=O)CC=C2)CC	86	%PPB	PPB	Zhu et al., 2013
467	penicillin50	S1C2N(C(C(O)=O)C1(C)C)C(=O)C2NC(=O)C(Oc1ccccc1)CC	86.1	%PPB	PPB	Zhu et al., 2013
468	beclomethasone dipropionate	ClC12C(C3CC(C)C(OC(=O)CC)(C(=O)COC(=O)CC)C3(CC1O)C)CCC1=CC(=O)C=CC12C	87	%PPB	PPB	Zhu et al., 2013
469	chlorcyclizine	Clc1ccc(cc1)C(N1CCN(CC1)C)c1ccccc1	87	%PPB	PPB	Zhu et al., 2013
470	papaverine	O(C)c1cc(ccc1OC)Cc1nccc2c1cc(OC)c(OC)c2	87	%PPB	PPB	Zhu et al., 2013
471	penicillin14	S1C2N(C(C(O)=O)C1(C)C)C(=O)C2NC(=O)c1ccccc1	87	%PPB	PPB	Zhu et al., 2013
472	pirmenol	OC(CCCN1C(CCCC1C)C)(c1ccccc1)c1ncccc1	87	%PPB	PPB	Zhu et al., 2013
473	rofecoxib	S(=O)(=O)(C)c1ccc(cc1)C=1COC(=O)C=1c1ccccc1	87	%PPB	PPB	Zhu et al., 2013
474	acetazolamide	s1c(nnc1S(=O)(=O)N)NC(=O)C	88	%PPB	PPB	Zhu et al., 2013
475	azelastine	Clc1ccc(cc1)CC1=NN(C2CCCN(CC2)C)C(=O)c2c1cccc2	88	%PPB	PPB	Zhu et al., 2013
476	budesonide	O1C2(C(OC1CCC)CC1C3C(C4(C(=CC(=O)C=C4)CC3)C)C(O)CC12C)C(=O)CO	88	%PPB	PPB	Zhu et al., 2013
477	cefditoren-pivoxil	s1cnc(C)c1\C=C\C=1CSC2N(C(=O)C2NC(=O)\C(=N/OC)\c2nc(sc2)N)C=1C(OCOC(=O)C(C)(C)C)=O	88	%PPB	PPB	Zhu et al., 2013
478	fenoldopam	Clc1c2c(cc(O)c1O)C(CNCC2)c1ccc(O)cc1	88	%PPB	PPB	Zhu et al., 2013
479	fluticasone propionate	S(C(=O)C1(OC(=O)CC)C2(CC(O)C3(F)C(C2CC1C)CC(F)C1=CC(=O)C=CC13C)C)CF	88	%PPB	PPB	Zhu et al., 2013
480	moracizine	S1c2c(N(c3c1cccc3)C(=O)CCN1CCOCC1)cc(NC(OCC)=O)cc2	88	%PPB	PPB	Zhu et al., 2013
481	nitrazepam	O=C1Nc2c(cc([N+](=O)[O-])cc2)C(=NC1)c1ccccc1	88	%PPB	PPB	Zhu et al., 2013
482	penicillin39	Brc1cc(ccc1)C(OC)C(=O)NC1C2SC(C)(C)C(N2C1=O)C(O)=O	88	%PPB	PPB	Zhu et al., 2013
483	pyrimethamine	Clc1ccc(cc1)-c1c(nc(nc1N)N)CC	88	%PPB	PPB	Zhu et al., 2013
484	valproic acid	OC(=O)C(CCC)CCC	88	%PPB	PPB	Zhu et al., 2013
485	dantrolene	o1c(ccc1\C=N\N1CC(=O)NC1=O)-c1ccc([N+](=O)[O-])cc1	89	%PPB	PPB	Zhu et al., 2013
486	GSQ1530	Clc1c(nsc1Cl)C(=O)Nc1cc(n(c1)C)C(=O)Nc1cc(n(c1)C)C(=O)Nc1cc(n(c1)C)C(=O)NCCC(N)=N	89	%PPB	PPB	Zhu et al., 2013
487	risperidone	Fc1cc2onc(c2cc1)C1CCN(CC1)CCC=1C(=O)N2C(=NC=1C)CCCC2	89	%PPB	PPB	Zhu et al., 2013
488	nafcillin	S1C2N(C(C(O)=O)C1(C)C)C(=O)C2NC(=O)c1c2c(ccc1OCC)cccc2	89.4	%PPB	PPB	Zhu et al., 2013
489	propafenone	O(CC(O)CNCCC)c1ccccc1C(=O)CCc1ccccc1	89.6	%PPB	PPB	Zhu et al., 2013
490	acemetacin	Clc1ccc(cc1)C(=O)n1c2c(cc(OC)cc2)c(CC(OCC(O)=O)=O)c1C	90	%PPB	PPB	Zhu et al., 2013
491	alfentanil	O=C1N(N=NN1CC)CCN1CCC(N(C(=O)CC)c2ccccc2)(CC1)COC	90	%PPB	PPB	Zhu et al., 2013
492	alfuzosin	O1CCCC1C(=O)NCCCN(C)c1nc(N)c2cc(OC)c(OC)cc2n1	90	%PPB	PPB	Zhu et al., 2013
493	amodiaquine	Clc1cc2nccc(Nc3cc(CN(CC)CC)c(O)cc3)c2cc1	90	%PPB	PPB	Zhu et al., 2013
494	amoxapine	Clc1cc2c(Oc3c(N=C2N2CCNCC2)cccc3)cc1	90	%PPB	PPB	Zhu et al., 2013
495	amprenavir	S(=O)(=O)(N(CC(C)C)CC(O)C(NC(OC1CCOC1)=O)Cc1ccccc1)c1ccc(N)cc1	90	%PPB	PPB	Zhu et al., 2013
496	diazoxide	Clc1cc2S(=O)(=O)N=C(Nc2cc1)C	90	%PPB	PPB	Zhu et al., 2013
497	donepezil	O(C)c1cc2c(CC(CC3CCN(CC3)Cc3ccccc3)C2=O)cc1OC	90	%PPB	PPB	Zhu et al., 2013
498	ethacrynic acid	Clc1c(Cl)c(OCC(O)=O)ccc1C(=O)C(CC)=C	90	%PPB	PPB	Zhu et al., 2013
499	ethyl-biscoumacetate	O1c2c(cccc2)C(=O)C(C(C(OCC)=O)C=2C(=O)c3c(OC=2O)cccc3)C1O	90	%PPB	PPB	Zhu et al., 2013
500	exemestane	O=C1CCC2C3C(CCC12C)C1(C(=CC(=O)C=C1)C(C3)=C)C	90	%PPB	PPB	Zhu et al., 2013
501	flufenamic acid	FC(F)(F)c1cc(Nc2ccccc2C(O)=O)ccc1	90	%PPB	PPB	Zhu et al., 2013
502	fluocortolone	FC1C2=CC(=O)C=CC2(C2C(C3CC(C)C(C(=O)CO)C3(CC2O)C)C1)C	90	%PPB	PPB	Zhu et al., 2013
503	gallopamil	O(C)c1c(OC)cc(cc1OC)C(C(C)C)(CCCN(CCc1cc(OC)c(OC)cc1)C)C#N	90	%PPB	PPB	Zhu et al., 2013
504	irbesartan	O=C1N(Cc2ccc(cc2)-c2ccccc2-c2nn[nH]n2)C(=NC12CCCC2)CCCC	90	%PPB	PPB	Zhu et al., 2013
505	maprotiline	N(CCCC12CCC(c3c1cccc3)c1c2cccc1)C	90	%PPB	PPB	Zhu et al., 2013
506	melphalan	ClCCN(CCCl)c1ccc(cc1)CC(N)C(O)=O	90	%PPB	PPB	Zhu et al., 2013
507	mepacrine	Clc1cc2NC3C(C=C(OC)C=C3)\C(=N/C(CCCN(CC)CC)C)\c2cc1	90	%PPB	PPB	Zhu et al., 2013
508	mequitazine	S1c2c(N(c3c1cccc3)CC1C3CCN(C1)CC3)cccc2	90	%PPB	PPB	Zhu et al., 2013
509	nafronyl	O1CCCC1CC(Cc1c2c(ccc1)cccc2)C(OCCN(CC)CC)=O	90	%PPB	PPB	Zhu et al., 2013
510	opipramol	OCCN1CCN(CC1)CCCN1c2c(C=Cc3c1cccc3)cccc2	90	%PPB	PPB	Zhu et al., 2013
511	pergolide	S(CC1CC2C(N(C1)CCC)Cc1c3c2cccc3[nH]c1)C	90	%PPB	PPB	Zhu et al., 2013
512	propiverine	O(C(=O)C(OCCC)(c1ccccc1)c1ccccc1)C1CCN(CC1)C	90	%PPB	PPB	Zhu et al., 2013
513	quinagolide	S(=O)(=O)(N(CC)CC)CC1CC2C(N(C1)CCC)Cc1c(C2)c(O)ccc1	90	%PPB	PPB	Zhu et al., 2013
514	riluzole	s1c2cc(OC(F)(F)F)ccc2nc1N	90	%PPB	PPB	Zhu et al., 2013
515	sulfamethizole	s1c(nnc1NS(=O)(=O)c1ccc(N)cc1)C	90	%PPB	PPB	Zhu et al., 2013
516	triprolidine	n1ccccc1/C(=C\CN1CCCC1)/c1ccc(cc1)C	90	%PPB	PPB	Zhu et al., 2013
517	verapamil	O(C)c1cc(ccc1OC)C(C(C)C)(CCCN(CCc1cc(OC)c(OC)cc1)C)C#N	90	%PPB	PPB	Zhu et al., 2013
518	viloxazine	O1CCNCC1COc1ccccc1OCC	90	%PPB	PPB	Zhu et al., 2013
519	vitamin-K	O=C1c2c(cccc2)C(=O)C(C)=C1C\C=C(\CCCC(CCCC(CCCC(C)C)C)C)/C	90	%PPB	PPB	Zhu et al., 2013
520	zimeldine	Brc1ccc(cc1)\C(=C/CN(C)C)\c1cccnc1	90	%PPB	PPB	Zhu et al., 2013
521	disopyramide	O=C(N)C(CCN(C(C)C)C(C)C)(c1ccccc1)c1ncccc1	90.4	%PPB	PPB	Zhu et al., 2013
522	doxycycline	OC12C(C(N(C)C)C(=O)C(C(=O)N)=C1O)C(O)C1C(=C2O)C(=O)c2c(cccc2O)C1C	90.5	%PPB	PPB	Zhu et al., 2013
523	cocaine	O(C(=O)c1ccccc1)C1CC2N(C(CC2)C1C(OC)=O)C	91	%PPB	PPB	Zhu et al., 2013
524	oxatomide	Oc1nc2c(n1CCCN1CCN(CC1)C(c1ccccc1)c1ccccc1)cccc2	91	%PPB	PPB	Zhu et al., 2013
525	penicillin16	S1C2N(C(C(O)=O)C1(C)C)C(=O)C2NC(=O)c1ccccc1-c1ccccc1	91	%PPB	PPB	Zhu et al., 2013
526	phenytoin	O=C1NC(=O)NC1(c1ccccc1)c1ccccc1	91	%PPB	PPB	Zhu et al., 2013
527	pizotyline	s1c2c(cc1)/C(/c1c(CC2)cccc1)=C\1/CCN(CC/1)C	91	%PPB	PPB	Zhu et al., 2013
528	sulfafurazole	S(=O)(=O)(Nc1onc(C)c1C)c1ccc(N)cc1	91.4	%PPB	PPB	Zhu et al., 2013
529	lorazepam	Clc1ccccc1C1=NC(O)C(=O)Nc2c1cc(Cl)cc2	91.5	%PPB	PPB	Zhu et al., 2013
530	penicillin52	S1C2N(C(C(O)=O)C1(C)C)C(=O)C2NC(=O)COc1ccccc1F	91.5	%PPB	PPB	Zhu et al., 2013
531	alprostadil	OC1CC(=O)C(CCCCCCC(O)=O)C1\C=C\C(O)CCCCC	92	%PPB	PPB	Zhu et al., 2013
532	clobazam	Clc1cc2N(C(=O)CC(=O)N(c2cc1)C)c1ccccc1	92	%PPB	PPB	Zhu et al., 2013
533	domperidone	Clc1cc2nc(O)n(c2cc1)C1CCN(CC1)CCCn1c2c(nc1O)cccc2	92	%PPB	PPB	Zhu et al., 2013
534	finasteride	O=C1NC2CCC3C4CCC(C(=O)NC(C)(C)C)C4(CCC3C2(C=C1)C)C	92	%PPB	PPB	Zhu et al., 2013
535	haloperidol	Clc1ccc(cc1)C1(O)CCN(CC1)CCCC(=O)c1ccc(F)cc1	92	%PPB	PPB	Zhu et al., 2013
536	ketoconazole	Clc1cc(Cl)ccc1C1(OC(CO1)COc1ccc(N2CCN(CC2)C(=O)C)cc1)Cn1ccnc1	92	%PPB	PPB	Zhu et al., 2013
537	oxacillin	S1C2N(C(C(O)=O)C1(C)C)C(=O)C2NC(=O)c1c(noc1C)-c1ccccc1	92	%PPB	PPB	Zhu et al., 2013
538	penicillin42	Clc1ccc(OC(C(=O)NC2C3SC(C)(C)C(N3C2=O)C(O)=O)C)cc1	92	%PPB	PPB	Zhu et al., 2013
539	protriptyline	N(CCCC1c2c(C=Cc3c1cccc3)cccc2)C	92	%PPB	PPB	Zhu et al., 2013
540	remifentanil	O(C(=O)C1(N(C(=O)CC)c2ccccc2)CCN(CC1)CCC(OC)=O)C	92	%PPB	PPB	Zhu et al., 2013
541	sirolimus	O1C(CC(=O)C(\C=C(/C)\C(O)C(OC)C(=O)C(CC(\C=C\C=C\C=C(/C)\C(OC)CC2OC(O)(C(=O)C(=O)N3C(CCCC3)C1=O)C(CC2)C)C)C)C)C(CC1CC(OC)C(O)CC1)C	92	%PPB	PPB	Zhu et al., 2013
542	sufentanil	s1cccc1CCN1CCC(N(C(=O)CC)c2ccccc2)(CC1)COC	92	%PPB	PPB	Zhu et al., 2013
543	trazodone	Clc1cc(N2CCN(CC2)CCCN2N=C3N(C=CC=C3)C2=O)ccc1	92	%PPB	PPB	Zhu et al., 2013
544	penicillin3	S1C2N(C(C(O)=O)C1(C)C)C(=O)C2NC(=O)CCCCCCC	92.4	%PPB	PPB	Zhu et al., 2013
545	penicillin49	S1C2N(C(C(O)=O)C1(C)C)C(=O)C2NC(=O)C(Oc1ccccc1)(C)C	92.5	%PPB	PPB	Zhu et al., 2013
546	cyclobenzaprine	N(CC\C=C/1\c2c(C=Cc3c\1cccc3)cccc2)(C)C	93	%PPB	PPB	Zhu et al., 2013
547	cyclosporine	O=C1N(C)C(CCC)C(=O)N(C)C(C(O)C(C\C=C\C)C)C(=O)NC(CC)C(=O)N(C)C(=O)N(C)C(CCCC)C(=O)NC(CCC)C(=O)N(C)C(CCCC)C(=O)NC(C)C(=O)NC(C)C(=O)N(C)C(CCCC)C(=O)N(C)C1CCCC	93	%PPB	PPB	Zhu et al., 2013
548	ertapenem	S(C=1C(C2N(C(=O)C2C(O)C)C=1C(O)=O)C)C1CC(NC1)C(=O)Nc1cc(ccc1)C(O)=O	93	%PPB	PPB	Zhu et al., 2013
549	etizolam	Clc1ccccc1C1=NCc2n(-c3sc(cc13)CC)c(nn2)C	93	%PPB	PPB	Zhu et al., 2013
550	glisoxepide	S(=O)(=O)(NC(=O)NN1CCCCCC1)c1ccc(cc1)CCNC(=O)c1noc(c1)C	93	%PPB	PPB	Zhu et al., 2013
551	ivermectin	O1C(C(CC)C)C(CCC12OC1CC(OC(=O)C3C=C(C)C(O)C4OC\C(=C/C=C/C(C)C(OC5OC(C)C(OC6OC(C)C(O)C(OC)C6)C(OC)C5)/C(=C/C1)/C)\C34O)C2)C	93	%PPB	PPB	Zhu et al., 2013
552	mianserin	N12C(c3c(Cc4c1cccc4)cccc3)CN(CC2)C	93	%PPB	PPB	Zhu et al., 2013
553	quinine	O(C)c1cc2c(nccc2C(O)C2N3CC(C(C2)CC3)C=C)cc1	93	%PPB	PPB	Zhu et al., 2013
554	raltitrexed	s1c(ccc1N(Cc1cc2c(nc(nc2O)C)cc1)C)C(=O)NC(CCC(O)=O)C(O)=O	93	%PPB	PPB	Zhu et al., 2013
555	zileuton	s1c2c(cc1C(N(O)C(=O)N)C)cccc2	93	%PPB	PPB	Zhu et al., 2013
556	penicillin4	S1C2N(C(C(O)=O)C1(C)C)C(=O)C2NC(=O)C(C(CCC)CC)CCC	93.3	%PPB	PPB	Zhu et al., 2013
557	cicletanine	Clc1ccc(cc1)C1OCc2c1cnc(C)c2O	93.5	%PPB	PPB	Zhu et al., 2013
558	nortriptyline	N(CC\C=C/1\c2c(CCc3c\1cccc3)cccc2)C	93.5	%PPB	PPB	Zhu et al., 2013
559	ceftriaxone	s1cc(nc1N)/C(=N/OC)/C(=O)NC1C2SCC(CSC=3[N+]([N-]C(=O)C(=O)N=3)=C)=C(N2C1=O)C(O)=O	93.8	%PPB	PPB	Zhu et al., 2013
560	altretamine	n1c(nc(nc1N(C)C)N(C)C)N(C)C	94	%PPB	PPB	Zhu et al., 2013
561	amlodipine	Clc1ccccc1C1\C(=C(/OCC)\O)\C(=NC(C)=C1C(OC)=O)COCCN	94	%PPB	PPB	Zhu et al., 2013
562	amphotericin-B	O1C(C)C(O)C(N)C(O)C1OC1\C=C\C=C\C=C\C=C\C=C\C=C\C=C\C(C)C(O)C(C)C(OC(=O)CC(O)CC(O)CCC(O)C(O)CC(O)CC2(OC(C1)C(C(O)=O)C(O)C2)O)C	94	%PPB	PPB	Zhu et al., 2013
563	bendrofluazide	S(=O)(=O)(N)c1cc2S(=O)(=O)NC(Nc2cc1C(F)(F)F)Cc1ccccc1	94	%PPB	PPB	Zhu et al., 2013
564	canrenoate	OC1(CCC2C3C(CCC12C)C1(C(=CC(=O)CC1)C=C3)C)CCC(O)=O	94	%PPB	PPB	Zhu et al., 2013
565	flavopiridol	Clc1ccccc1C=1Oc2c(C(=O)C=1)c(O)cc(O)c2C1CCN(CC1O)C	94	%PPB	PPB	Zhu et al., 2013
566	indeloxazine	O1CCNCC1COc1c2CC=Cc2ccc1	94	%PPB	PPB	Zhu et al., 2013
567	mycophenolic acid	O1Cc2c(c(O)c(C\C=C(\CCC(O)=O)/C)c(OC)c2C)C1=O	95.63	%PPB	PPB	Zhu et al., 2013
568	nalidixic acid	O=C1c2ccc(nc2N(C=C1C(O)=O)CC)C	94	%PPB	PPB	Zhu et al., 2013
569	penicillin23	Clc1cc(ccc1)C(Cl)C(=O)NC1C2SC(C)(C)C(N2C1=O)C(O)=O	94	%PPB	PPB	Zhu et al., 2013
570	piretanide	S(=O)(=O)(N)c1cc(cc(N2CCCC2)c1Oc1ccccc1)C(O)=O	94	%PPB	PPB	Zhu et al., 2013
571	prazosin	o1cccc1C(=O)N1CCN(CC1)c1nc(N)c2cc(OC)c(OC)cc2n1	94	%PPB	PPB	Zhu et al., 2013
572	propranolol	O(CC(O)CNC(C)C)c1c2c(ccc1)cccc2	94	%PPB	PPB	Zhu et al., 2013
573	selegiline	N(C(Cc1ccccc1)C)(CC#C)C	94	%PPB	PPB	Zhu et al., 2013
574	sulfadoxine	S(=O)(=O)(Nc1ncnc(OC)c1OC)c1ccc(N)cc1	94	%PPB	PPB	Zhu et al., 2013
575	trandolaprilat	OC(=O)C1N(C2C(C1)CCCC2)C(=O)C(NC(CCc1ccccc1)C(O)=O)C	94	%PPB	PPB	Zhu et al., 2013
576	indomethacin	Clc1ccc(cc1)C(=O)n1c2c(cc(OC)cc2)c(CC(O)=O)c1C	94.5	%PPB	PPB	Zhu et al., 2013
577	penicillin69	S1C2N(C(C(O)=O)C1(C)C)C(=O)C2NC(=O)C(Oc1cc2c(cc1)cccc2)C	94.7	%PPB	PPB	Zhu et al., 2013
578	fusidic acid	O(C(=O)C)C/1CC2(C(CC(O)C3C2(CCC2C(C)C(O)CCC23C)C)\C\1=C(\CC\C=C(\C)/C)/C(O)=O)C	94.8	%PPB	PPB	Zhu et al., 2013
579	penicillin56	Clc1cc(ccc1Cl)C(OC)C(=O)NC1C2SC(C)(C)C(N2C1=O)C(O)=O	94.8	%PPB	PPB	Zhu et al., 2013
580	aprindine	N(CCCN(CC)CC)(C1Cc2c(C1)cccc2)c1ccccc1	95	%PPB	PPB	Zhu et al., 2013
581	bezafibrate	Clc1ccc(cc1)C(=O)NCCc1ccc(OC(C(O)=O)(C)C)cc1	95	%PPB	PPB	Zhu et al., 2013
582	bifemelane	O(CCCCNC)c1ccccc1Cc1ccccc1	95	%PPB	PPB	Zhu et al., 2013
583	biperiden	OC(CCN1CCCCC1)(C1C2CC(C1)C=C2)c1ccccc1	95	%PPB	PPB	Zhu et al., 2013
584	bromocriptine	Brc1[nH]c2c3c1CC1N(CC(C=C1c3ccc2)C(=O)NC1(OC2(O)N(C(CC(C)C)C(=O)N3C2CCC3)C1=O)C(C)C)C	95	%PPB	PPB	Zhu et al., 2013
585	bumetanide	S(=O)(=O)(N)c1cc(cc(NCCCC)c1Oc1ccccc1)C(O)=O	95	%PPB	PPB	Zhu et al., 2013
586	bupivacaine	O=C(Nc1c(cccc1C)C)C1N(CCCC1)CCCC	95	%PPB	PPB	Zhu et al., 2013
587	buspirone	O=C1N(CCCCN2CCN(CC2)c2ncccn2)C(=O)CC2(C1)CCCC2	95	%PPB	PPB	Zhu et al., 2013
588	butriptyline	N(CC(CC1c2c(CCc3c1cccc3)cccc2)C)(C)C	95	%PPB	PPB	Zhu et al., 2013
589	calcitriol	OC1CC(O)C\C(=C/C=C\2/C3CCC(C(CCCC(O)(C)C)C)C3(CCC/2)C)\C1=C	95	%PPB	PPB	Zhu et al., 2013
590	carvedilol	O(CCNCC(O)COc1c2c3c([nH]c2ccc1)cccc3)c1ccccc1OC	95	%PPB	PPB	Zhu et al., 2013
591	chlordiazepoxide	Clc1ccc2N=C(CN(=O)=C(c2c1)c3ccccc3)NC	95	%PPB	PPB	Zhu et al., 2013
592	ciprofibrate	ClC1(Cl)CC1c1ccc(OC(C(O)=O)(C)C)cc1	95	%PPB	PPB	Zhu et al., 2013
593	cloxacillin	Clc1ccccc1-c1noc(C)c1C(=O)NC1C2SC(C)(C)C(N2C1=O)C(O)=O	95	%PPB	PPB	Zhu et al., 2013
594	clozapine	Clc1cc2N=C(N3CCN(CC3)C)c3c(Nc2cc1)cccc3	95	%PPB	PPB	Zhu et al., 2013
595	digitoxin	O1C(C)C(OC2OC(C)C(O)C(O)C2)C(O)CC1OC1C(OC(OC2CC3CCC4C(CCC5(C)C(CCC45O)C4=CC(OC4)=O)C3(CC2)C)CC1O)C	95	%PPB	PPB	Zhu et al., 2013
596	droperidol	Fc1ccc(cc1)C(=O)CCCN1CCC(n2c3c(nc2O)cccc3)=CC1	95	%PPB	PPB	Zhu et al., 2013
597	ergotamine	O1C(NC(=O)C2C=C3C(N(C2)C)Cc2c4c3cccc4[nH]c2)(C)C(=O)N2C(Cc3ccccc3)C(=O)N3C(CCC3)C12O	95	%PPB	PPB	Zhu et al., 2013
598	etoposide	O1C2C(OC(OC2)C)C(O)C(O)C1OC1C2C(C(c3c1cc1OCOc1c3)c1cc(OC)c(O)c(OC)c1)C(OC2)=O	95	%PPB	PPB	Zhu et al., 2013
599	feprazone	O=C1N(N(C(=O)C1C\C=C(\C)/C)c1ccccc1)c1ccccc1	95	%PPB	PPB	Zhu et al., 2013
600	floxacillin	Clc1cccc(F)c1-c1noc(C)c1C(=O)NC1C2SC(C)(C)C(N2C1=O)C(O)=O	95	%PPB	PPB	Zhu et al., 2013
601	flunarizine	Fc1ccc(cc1)C(N1CCN(CC1)C\C=C\c1ccccc1)c1ccc(F)cc1	95	%PPB	PPB	Zhu et al., 2013
602	fluoxetine	FC(F)(F)c1ccc(OC(CCNC)c2ccccc2)cc1	95	%PPB	PPB	Zhu et al., 2013
603	flupenthixol	S1c2c(cc(cc2)C(F)(F)F)\C(\c2c1cccc2)=C\CCN1CCN(CC1)CCO	95	%PPB	PPB	Zhu et al., 2013
604	fluphenazine	S1c2c(N(c3c1cccc3)CCCN1CCN(CC1)CCO)cc(cc2)C(F)(F)F	95	%PPB	PPB	Zhu et al., 2013
605	fosinopril	P(OC(OC(=O)CC)C(C)C)(=O)(CCCCc1ccccc1)CC(=O)N1CC(CC1C(O)=O)C1CCCCC1	95	%PPB	PPB	Zhu et al., 2013
606	fosphenytoin	P(OCN1C(=O)C(NC1=O)(c1ccccc1)c1ccccc1)(O)(O)=O	95	%PPB	PPB	Zhu et al., 2013
607	glibornuride	S(=O)(=O)(NC(=O)NC1C2CCC(C)(C1O)C2(C)C)c1ccc(cc1)C	95	%PPB	PPB	Zhu et al., 2013
608	ketanserin	Fc1ccc(cc1)C(=O)C1CCN(CC1)CCN1C(=O)c2c(NC1=O)cccc2	95	%PPB	PPB	Zhu et al., 2013
609	ketoprofen	OC(=O)C(C)c1cc(ccc1)C(=O)c1ccccc1	95	%PPB	PPB	Zhu et al., 2013
610	lacidipine	O(C(=O)C=1C(\C(=C(/OCC)\O)\C(=NC=1C)C)c1ccccc1\C=C\C(OC(C)(C)C)=O)CC	95	%PPB	PPB	Zhu et al., 2013
611	mebendazole	O(C(=O)Nc1[nH]c2c(n1)cc(cc2)C(=O)c1ccccc1)C	95	%PPB	PPB	Zhu et al., 2013
612	metastat	OC12C(CC(=O)C(C(=O)N)=C1O)CC1C(C2=O)=C(O)c2c(C1)cccc2O	95	%PPB	PPB	Zhu et al., 2013
613	metolazone	Clc1cc2NC(N(c3ccccc3C)C(=O)c2cc1S(=O)(=O)N)C	95	%PPB	PPB	Zhu et al., 2013
614	miconazole	Clc1cc(Cl)ccc1C(OCc1ccc(Cl)cc1Cl)Cn1ccnc1	95	%PPB	PPB	Zhu et al., 2013
615	nicergoline	Brc1cc(cnc1)C(OCC1CC2(OC)C(N(C1)C)Cc1c3c2cccc3n(c1)C)=O	95	%PPB	PPB	Zhu et al., 2013
616	orphenadrine	O(C(c1ccccc1C)c1ccccc1)CCN(C)C	95	%PPB	PPB	Zhu et al., 2013
617	oxandrolone	O1CC2(C(CC1=O)CCC1C3CCC(O)(C)C3(CCC12)C)C	95	%PPB	PPB	Zhu et al., 2013
618	penbutolol	O(CC(O)CNC(C)(C)C)c1ccccc1C1CCCC1	95	%PPB	PPB	Zhu et al., 2013
619	perazine	S1c2c(N(c3c1cccc3)CCCN1CCN(CC1)C)cccc2	95	%PPB	PPB	Zhu et al., 2013
620	pimozide	Fc1ccc(cc1)C(CCCN1CCC(n2c3c(nc2O)cccc3)CC1)c1ccc(F)cc1	95	%PPB	PPB	Zhu et al., 2013
621	quazepam	Clc1cc2c(N(CC(F)(F)F)C(=S)CN=C2c2ccccc2F)cc1	95	%PPB	PPB	Zhu et al., 2013
622	sibutramine	Clc1ccc(cc1)C1(CCC1)C(N(C)C)CC(C)C	95	%PPB	PPB	Zhu et al., 2013
623	sulfadimethoxine	S(=O)(=O)(Nc1nc(OC)nc(OC)c1)c1ccc(N)cc1	95	%PPB	PPB	Zhu et al., 2013
624	sulfaphenazole	S(=O)(=O)(Nc1n(ncc1)-c1ccccc1)c1ccc(N)cc1	95	%PPB	PPB	Zhu et al., 2013
625	tertatolol	S1c2c(CCC1)cccc2OCC(O)CNC(C)(C)C	95	%PPB	PPB	Zhu et al., 2013
626	tolterodine	Oc1ccc(cc1C(CCN(C(C)C)C(C)C)c1ccccc1)C	95	%PPB	PPB	Zhu et al., 2013
627	trimipramine	N(CC(CN1c2c(CCc3c1cccc3)cccc2)C)(C)C	95	%PPB	PPB	Zhu et al., 2013
628	simvastatin	O1C(CC(O)CC1=O)CCC1C2C(=CC(CC2OC(=O)C(CC)(C)C)C)C=CC1C	95	%PPB	PPB	Zhu et al., 2013
629	isotretinoin	OC(=O)\C=C(\C=C\C=C(\C=C\C=1C(CCCC=1C)(C)C)/C)/C	95	%PPB	PPB	Zhu et al., 2013
630	penicillin63	Clc1cccc(Cl)c1OCC(CC)C(=O)NC1C2SC(C)(C)C(N2C1=O)C(O)=O	95.2	%PPB	PPB	Zhu et al., 2013
631	penicillin65	S1C2N(C(C(O)=O)C1(C)C)C(=O)C2NC(=O)c1cc2c(cc1)cccc2	95.6	%PPB	PPB	Zhu et al., 2013
632	acetohexamide	S(=O)(=O)(NC(=O)NC1CCCCC1)c1ccc(cc1)C(=O)C	96	%PPB	PPB	Zhu et al., 2013
633	atomoxetine	O(C(CCNC)c1ccccc1)c1ccccc1C	96	%PPB	PPB	Zhu et al., 2013
634	azosemide	Clc1cc(NCc2sccc2)c(cc1S(=O)(=O)N)-c1nn[nH]n1	96	%PPB	PPB	Zhu et al., 2013
635	benazepril	O=C1N(c2c(CCC1NC(CCc1ccccc1)C(OCC)=O)cccc2)CC(O)=O	96	%PPB	PPB	Zhu et al., 2013
636	bevantolol	O(C)c1cc(ccc1OC)CCNCC(O)COc1cc(ccc1)C	96	%PPB	PPB	Zhu et al., 2013
637	bicalutamide	S(=O)(=O)(CC(O)(C(=O)Nc1cc(C(F)(F)F)c(cc1)C#N)C)c1ccc(F)cc1	96	%PPB	PPB	Zhu et al., 2013
638	budipine	N1(CCC(CC1)(c1ccccc1)c1ccccc1)C(C)(C)C	96	%PPB	PPB	Zhu et al., 2013
639	chlorpropamide	Clc1ccc(S(=O)(=O)NC(=O)NCCC)cc1	96	%PPB	PPB	Zhu et al., 2013
640	clofibrate	Clc1ccc(OC(C(OCC)=O)(C)C)cc1	96	%PPB	PPB	Zhu et al., 2013
641	dicloxacillin	Clc1cccc(Cl)c1-c1noc(C)c1C(=O)NC1C2SC(C)(C)C(N2C1=O)C(O)=O	96	%PPB	PPB	Zhu et al., 2013
642	ethinyl-estradiol	OC1(CCC2C3C(CCC12C)c1c(cc(O)cc1)CC3)C#C	96	%PPB	PPB	Zhu et al., 2013
643	loxoprofen	O=C1CCCC1Cc1ccc(cc1)C(C(O)=O)C	96	%PPB	PPB	Zhu et al., 2013
644	lynestrenol	OC1(CCC2C3C(C4C(CC3)=CCCC4)CCC12C)C#C	96	%PPB	PPB	Zhu et al., 2013
645	meproscillarin	O1C(C)C(OC)C(O)C(O)C1OC1CCC2(C3C(CCC2=C1)C1(O)CCC(C1(CC3)C)C=1C=CC(OC=1)=O)C	96	%PPB	PPB	Zhu et al., 2013
646	nifedipine	O(C(=O)C=1C(\C(=C(\OC)/O)\C(=NC=1C)C)c1ccccc1[N+](=O)[O-])C	96	%PPB	PPB	Zhu et al., 2013
647	oxazepam	Clc1cc2c(NC(=O)C(O)N=C2c2ccccc2)cc1	96	%PPB	PPB	Zhu et al., 2013
648	penicillin55	Clc1ccccc1OC(C(=O)NC1C2SC(C)(C)C(N2C1=O)C(O)=O)C	96	%PPB	PPB	Zhu et al., 2013
649	rabeprazole	S(=O)(Cc1nccc(OCCCOC)c1C)c1[nH]c2c(n1)cccc2	96	%PPB	PPB	Zhu et al., 2013
650	salmeterol	Oc1ccc(cc1CO)C(O)CNCCCCCCOCCCCc1ccccc1	96	%PPB	PPB	Zhu et al., 2013
651	sildenafil	S(=O)(=O)(N1CCN(CC1)C)c1cc(-c2nc(O)c3n(nc(c3n2)CCC)C)c(OCC)cc1	96	%PPB	PPB	Zhu et al., 2013
652	tamsulosin	S(=O)(=O)(N)c1cc(ccc1OC)CC(NCCOc1ccccc1OCC)C	96	%PPB	PPB	Zhu et al., 2013
653	tiagabine	s1ccc(C)c1\C(=C\CCN1CC(CCC1)C(O)=O)\c1sccc1C	96	%PPB	PPB	Zhu et al., 2013
654	tibolone	OC1(CCC2C3C(C4=C(CC3C)CC(=O)CC4)CCC12C)C#C	96	%PPB	PPB	Zhu et al., 2013
655	penicillin43	Clc1c(Cl)cc(cc1Cl)C(OC)C(=O)NC1C2SC(C)(C)C(N2C1=O)C(O)=O	96.5	%PPB	PPB	Zhu et al., 2013
656	ticlopidine	Clc1ccccc1CN1CCc2sccc2C1	96.5	%PPB	PPB	Zhu et al., 2013
657	temazepam	Clc1cc2c(N(C)C(=O)C(O)N=C2c2ccccc2)cc1	96.8	%PPB	PPB	Zhu et al., 2013
658	omeprazole	S(=O)(Cc1ncc(C)c(OC)c1C)c1[nH]c2c(n1)cc(OC)cc2	97	%PPB	PPB	Zhu et al., 2013
659	astemizole	Fc1ccc(cc1)Cn1c2c(nc1NC1CCN(CC1)CCc1ccc(OC)cc1)cccc2	97	%PPB	PPB	Zhu et al., 2013
660	celecoxib	S(=O)(=O)(N)c1ccc(-n2nc(cc2-c2ccc(cc2)C)C(F)(F)F)cc1	97	%PPB	PPB	Zhu et al., 2013
661	docetaxel	O1C2CC(O)C3(C(C(OC(=O)c4ccccc4)C4(O)CC(OC(=O)C(O)C(NC(OC(C)(C)C)=O)c5ccccc5)C(=C(C4(C)C)C(O)C3=O)C)C2(OC(=O)C)C1)C	97	%PPB	PPB	Zhu et al., 2013
662	dydrogesterone	O=C1CCC2(C3C(C4CCC(C(=O)C)C4(CC3)C)C=CC2=C1)C	97	%PPB	PPB	Zhu et al., 2013
663	flurazepam	Clc1cc2c(N(CCN(CC)CC)C(=O)N=C2c2ccccc2F)cc1	97	%PPB	PPB	Zhu et al., 2013
664	gemfibrozil	O(CCCC(CC(O)=O)(C)C)c1cc(ccc1C)C	97	%PPB	PPB	Zhu et al., 2013
665	glipizide	S(=O)(=O)(NC(=O)NC1CCCCC1)c1ccc(cc1)CCNC(=O)c1ncc(nc1)C	97	%PPB	PPB	Zhu et al., 2013
666	idarubicin	O1C(C)C(O)C(N)CC1OC1CC(O)(Cc2c1c(O)c1c(C(=O)c3c(cccc3)C1=O)c2O)C(=O)C	97	%PPB	PPB	Zhu et al., 2013
667	loperamide	Clc1ccc(cc1)C1(O)CCN(CC1)CCC(C(=O)N(C)C)(c1ccccc1)c1ccccc1	97	%PPB	PPB	Zhu et al., 2013
668	loratadine	Clc1cc2c(cc1)\C(\c1ncccc1CC2)=C\1/CCN(CC/1)C(OCC)=O	97	%PPB	PPB	Zhu et al., 2013
669	lovastatin	O1C(CC(O)CC1=O)CCC1C2(C(=CC(CC2OC(=O)C(CC)C)C)C=CC1C)C	97	%PPB	PPB	Zhu et al., 2013
670	mefloquine	FC(F)(F)c1c2nc(cc(c2ccc1)C(O)C1NCCCC1)C(F)(F)F	97	%PPB	PPB	Zhu et al., 2013
671	nimodipine	O(C(=O)C=1C(\C(=C(/OCCOC)\O)\C(=NC=1C)C)c1cc([N+](=O)[O-])ccc1)C(C)C	97	%PPB	PPB	Zhu et al., 2013
672	nordazepam	Clc1cc2c(NC(=O)CN=C2c2ccccc2)cc1	97	%PPB	PPB	Zhu et al., 2013
673	penicillin25	Clc1cc(ccc1Cl)C(Cl)C(=O)NC1C2SC(C)(C)C(N2C1=O)C(O)=O	97	%PPB	PPB	Zhu et al., 2013
674	penicillin59	Clc1cc(OC(C(=O)NC2C3SC(C)(C)C(N3C2=O)C(O)=O)C)cc(Cl)c1	97	%PPB	PPB	Zhu et al., 2013
675	phenindione	O=C1c2c(cccc2)C(=O)C1c1ccccc1	97	%PPB	PPB	Zhu et al., 2013
676	prazepam	Clc1cc2c(N(CC3CC3)C(=O)CN=C2c2ccccc2)cc1	97	%PPB	PPB	Zhu et al., 2013
677	progesterone	O=C1CCC2(C3C(C4CCC(C(=O)C)C4(CC3)C)CCC2=C1)C	97	%PPB	PPB	Zhu et al., 2013
678	quinapril	O(C(=O)C(NC(C(=O)N1Cc2c(CC1C(O)=O)cccc2)C)CCc1ccccc1)CC	97	%PPB	PPB	Zhu et al., 2013
679	reboxetine	O1CCNCC1C(Oc1ccccc1OCC)c1ccccc1	97	%PPB	PPB	Zhu et al., 2013
680	sulfachlorpyridazine	Clc1nnc(NS(=O)(=O)c2ccc(N)cc2)cc1	97	%PPB	PPB	Zhu et al., 2013
681	sulfaethidole	s1c(nnc1NS(=O)(=O)c1ccc(N)cc1)CC	97	%PPB	PPB	Zhu et al., 2013
682	sulfasalazine	S(=O)(=O)(Nc1ncccc1)c1ccc(N=Nc2cc(C(O)=O)c(O)cc2)cc1	97	%PPB	PPB	Zhu et al., 2013
683	tolazamide	S(=O)(=O)(NC(=O)NN1CCCCCC1)c1ccc(cc1)C	97	%PPB	PPB	Zhu et al., 2013
684	trimetrexate	O(C)c1c(OC)cc(NCc2ccc3nc(nc(N)c3c2C)N)cc1OC	97	%PPB	PPB	Zhu et al., 2013
685	ursodiol	OC1C2C3CCC(C(CCC(O)=O)C)C3(CCC2C2(C(C1)CC(O)CC2)C)C	97	%PPB	PPB	Zhu et al., 2013
686	zotepine	Clc1cc2c(Sc3c(C=C2OCCN(C)C)cccc3)cc1	97	%PPB	PPB	Zhu et al., 2013
687	norgestrel	OC1(CCC2C3C(C4C(=CC(=O)CC4)CC3)CCC12CC)C#C	97	%PPB	PPB	Zhu et al., 2013
688	penicillin51	S1C2N(C(C(O)=O)C1(C)C)C(=O)C2NC(=O)C(Oc1ccccc1)c1ccccc1	97.2	%PPB	PPB	Zhu et al., 2013
689	penicillin58	Clc1cc(OC(C(=O)NC2C3SC(C)(C)C(N3C2=O)C(O)=O)C)ccc1Cl	97.4	%PPB	PPB	Zhu et al., 2013
690	chlorpromazine	Clc1cc2N(c3c(Sc2cc1)cccc3)CCCN(C)C	97.8	%PPB	PPB	Zhu et al., 2013
691	phenylbutazone	O=C1N(N(C(=O)C1CCCC)c1ccccc1)c1ccccc1	97.8	%PPB	PPB	Zhu et al., 2013
692	amiodarone	Ic1cc(cc(I)c1OCCN(CC)CC)C(=O)c1c2c(oc1CCCC)cccc2	98	%PPB	PPB	Zhu et al., 2013
693	amosulalol	S(=O)(=O)(N)c1cc(ccc1C)C(O)CNCCOc1ccccc1OC	98	%PPB	PPB	Zhu et al., 2013
694	amsacrine	S(=O)(=O)(Nc1cc(OC)c(Nc2c3c(nc4c2cccc4)cccc3)cc1)C	98	%PPB	PPB	Zhu et al., 2013
695	atorvastatin	Fc1ccc(cc1)-c1n(CCC(O)CC(O)CC(O)=O)c(C(C)C)c(C(=O)Nc2ccccc2)c1-c1ccccc1	98	%PPB	PPB	Zhu et al., 2013
696	bosentan	S(=O)(=O)(Nc1nc(nc(OCCO)c1Oc1ccccc1OC)-c1ncccn1)c1ccc(cc1)C(C)(C)C	98	%PPB	PPB	Zhu et al., 2013
697	cefonicid	S1C2N(C(=O)C2NC(=O)C(O)c2ccccc2)C(C(O)=O)=C(C1)CSc1nnnn1CS(O)(=O)=O	98	%PPB	PPB	Zhu et al., 2013
698	cisapride	Clc1cc(C(=O)NC2CCN(CC2OC)CCCOc2ccc(F)cc2)c(OC)cc1N	98	%PPB	PPB	Zhu et al., 2013
699	clopidogrel	Clc1ccccc1C(N1CCc2sccc2C1)C(OC)=O	98	%PPB	PPB	Zhu et al., 2013
700	delavirdine	S(=O)(=O)(Nc1cc2cc([nH]c2cc1)C(=O)N1CCN(CC1)c1ncccc1NC(C)C)C	98	%PPB	PPB	Zhu et al., 2013
701	desogestrel	OC1(CCC2C3C(C4C(CC3)=CCCC4)C(CC12CC)=C)C#C	98	%PPB	PPB	Zhu et al., 2013
702	ebastine	O(C(c1ccccc1)c1ccccc1)C1CCN(CC1)CCCC(=O)c1ccc(cc1)C(C)(C)C	98	%PPB	PPB	Zhu et al., 2013
703	entacapone	Oc1c([N+](=O)[O-])cc(cc1O)\C=C(\C(=O)N(CC)CC)/C#N	98	%PPB	PPB	Zhu et al., 2013
704	eprosartan	s1cccc1C\C(=C\c1n(Cc2ccc(cc2)C(O)=O)c(nc1)CCCC)\C(O)=O	98	%PPB	PPB	Zhu et al., 2013
705	glimepiride	S(=O)(=O)(NC(=O)NC1CCC(CC1)C)c1ccc(cc1)CCNC(=O)N1CC(C)=C(CC)C1=O	98	%PPB	PPB	Zhu et al., 2013
706	indisulam	Clc1c2c([nH]c1)c(NS(=O)(=O)c1ccc(S(=O)(=O)N)cc1)ccc2	98	%PPB	PPB	Zhu et al., 2013
707	lansoprazole	S(=O)(Cc1nccc(OCC(F)(F)F)c1C)c1[nH]c2c(n1)cccc2	98	%PPB	PPB	Zhu et al., 2013
708	levosimendan	O=C1NN=C(C(C1)C)c1ccc(N\N=C(\C#N)/C#N)cc1	98	%PPB	PPB	Zhu et al., 2013
709	mestranol	O(C)c1cc2CCC3C4CCC(O)(C#C)C4(CCC3c2cc1)C	98	%PPB	PPB	Zhu et al., 2013
710	methotrimeprazine	S1c2c(N(c3c1cccc3)CC(CN(C)C)C)cc(OC)cc2	98	%PPB	PPB	Zhu et al., 2013
711	mifepristone	OC1(CCC2C3C(=C4C(=CC(=O)CC4)CC3)C(CC12C)c1ccc(N(C)C)cc1)C#CC	98	%PPB	PPB	Zhu et al., 2013
712	mizolastine	Fc1ccc(cc1)Cn1c2c(nc1N1CCC(N(C)c3nc(O)ccn3)CC1)cccc2	98	%PPB	PPB	Zhu et al., 2013
713	nateglinide	OC(=O)C(NC(=O)C1CCC(CC1)C(C)C)Cc1ccccc1	98	%PPB	PPB	Zhu et al., 2013
714	N-desalkylflurazepam	Clc1cc2c(N(CCC)C(=O)CN=C2c2ccccc2F)cc1	98	%PPB	PPB	Zhu et al., 2013
715	nebivolol	Fc1cc2CCC(Oc2cc1)C(O)CNCC(O)C1Oc2c(cc(F)cc2)CC1	98	%PPB	PPB	Zhu et al., 2013
716	nitrendipine	O(C(=O)C=1C(\C(=C(/OCC)\O)\C(=NC=1C)C)c1cc([N+](=O)[O-])ccc1)C	98	%PPB	PPB	Zhu et al., 2013
717	pantoprazole	S(=O)(Cc1nccc(OC)c1OC)c1[nH]c2c(n1)cc(OC(F)F)cc2	98	%PPB	PPB	Zhu et al., 2013
718	propofol	Oc1c(cccc1C(C)C)C(C)C	98	%PPB	PPB	Zhu et al., 2013
719	repaglinide	O(CC)c1cc(ccc1C(O)=O)CC(=O)NC(CC(C)C)c1ccccc1N1CCCCC1	98	%PPB	PPB	Zhu et al., 2013
720	saquinavir	OC(C(NC(=O)C(NC(=O)c1nc2c(cc1)cccc2)CC(=O)N)Cc1ccccc1)CN1CC2C(CC1C(=O)NC(C)(C)C)CCCC2	98	%PPB	PPB	Zhu et al., 2013
721	sulphinpyrazone	S(=O)(CCC1C(=O)N(N(C1=O)c1ccccc1)c1ccccc1)c1ccccc1	98	%PPB	PPB	Zhu et al., 2013
722	tegaserod	O(C)c1cc2c([nH]cc2\C=N\N\C(=N\CCCCC)\N)cc1	98	%PPB	PPB	Zhu et al., 2013
723	thioridazine	S1c2c(N(c3c1cccc3)CCC1N(CCCC1)C)cc(SC)cc2	98	%PPB	PPB	Zhu et al., 2013
724	tiaprofenic acid	s1c(ccc1C(C(O)=O)C)C(=O)c1ccccc1	98	%PPB	PPB	Zhu et al., 2013
725	valdecoxib	S(=O)(=O)(N)c1ccc(cc1)-c1c(noc1C)-c1ccccc1	98	%PPB	PPB	Zhu et al., 2013
726	zuclopenthixol	Clc1cc\2c(Sc3c(cccc3)/C/2=C\CCN2CCN(CC2)CCO)cc1	98	%PPB	PPB	Zhu et al., 2013
727	furosemide	Clc1cc(NCc2occc2)c(cc1S(=O)(=O)N)C(O)=O	98.4	%PPB	PPB	Zhu et al., 2013
728	fenbufen	OC(=O)CCC(=O)c1ccc(cc1)-c1ccccc1	98.5	%PPB	PPB	Zhu et al., 2013
729	zomepirac	Clc1ccc(cc1)C(=O)c1n(C)c(cc1C)CC(O)=O	98.5	%PPB	PPB	Zhu et al., 2013
730	balsalazide	Oc1ccc(N=Nc2ccc(cc2)C(=O)NCCC(O)=O)cc1C(O)=O	99	%PPB	PPB	Zhu et al., 2013
731	aceclofenac	Clc1cccc(Cl)c1Nc1ccccc1CC(OCC(O)=O)=O	99	%PPB	PPB	Zhu et al., 2013
732	alclofenac	Clc1cc(ccc1OCC=C)CC(O)=O	99	%PPB	PPB	Zhu et al., 2013
733	almitrine	Fc1ccc(cc1)C(N1CCN(CC1)c1nc(nc(n1)NCC=C)NCC=C)c1ccc(F)cc1	99	%PPB	PPB	Zhu et al., 2013
734	azapropazone	O=C1N2N(c3cc(ccc3N=C2N(C)C)C)C(=O)C1CCC	99	%PPB	PPB	Zhu et al., 2013
735	benoxaprofen	Clc1ccc(cc1)-c1oc2c(n1)cc(cc2)C(C(O)=O)C	99	%PPB	PPB	Zhu et al., 2013
736	benzbromarone	Brc1cc(cc(Br)c1O)C(=O)c1c2c(oc1CC)cccc2	99	%PPB	PPB	Zhu et al., 2013
737	candesartan	O(CC)c1nc2c(n1Cc1ccc(cc1)-c1ccccc1-c1nn[nH]n1)c(ccc2)C(O)=O	99	%PPB	PPB	Zhu et al., 2013
738	chlorambucil	ClCCN(CCCl)c1ccc(cc1)CCCC(O)=O	99	%PPB	PPB	Zhu et al., 2013
739	chlorprothixene	Clc1cc\2c(Sc3c(cccc3)/C/2=C\CCN(C)C)cc1	99	%PPB	PPB	Zhu et al., 2013
740	diazepam	Clc1cc2c(N(C)C(=O)CN=C2c2ccccc2)cc1	99	%PPB	PPB	Zhu et al., 2013
741	dicoumarol	O1c2c(cccc2)C(=O)C(CC=2C(=O)c3c(OC=2O)cccc3)=C1O	99	%PPB	PPB	Zhu et al., 2013
742	dieldrin	ClC12C3C(C4C5OC5C3C4)C(Cl)(C1(Cl)Cl)C(Cl)=C2Cl	99	%PPB	PPB	Zhu et al., 2013
743	efavirenz	Clc1cc2c(NC(OC2(C#CC2CC2)C(F)(F)F)=O)cc1	99	%PPB	PPB	Zhu et al., 2013
744	etretinate	O(C)c1cc(C)c(\C=C\C(=C\C=C\C(=C\C(OCC)=O)\C)\C)c(C)c1C	99	%PPB	PPB	Zhu et al., 2013
745	fenclofenac	Clc1cc(Cl)ccc1Oc1ccccc1CC(O)=O	99	%PPB	PPB	Zhu et al., 2013
746	fenofibrate	Clc1ccc(cc1)C(=O)c1ccc(OC(C(OC(C)C)=O)(C)C)cc1	99	%PPB	PPB	Zhu et al., 2013
747	fluvastatin	Fc1ccc(cc1)-c1c2c(n(C(C)C)c1\C=C\C(O)CC(O)CC(O)=O)cccc2	99	%PPB	PPB	Zhu et al., 2013
748	gestodene	OC1(C=CC2C3C(C4C(=CC(=O)CC4)CC3)CCC12CC)C#C	99	%PPB	PPB	Zhu et al., 2013
749	glibenclamide	Clc1cc(C(=O)NCCc2ccc(S(=O)(=O)NC(=O)NC3CCCCC3)cc2)c(OC)cc1	99	%PPB	PPB	Zhu et al., 2013
750	Ibuprofen	OC(=O)C(C)(C)c1ccc(cc1)CC(C)C	99	%PPB	PPB	Zhu et al., 2013
751	leflunomide	FC(F)(F)c1ccc(NC(=O)c2cnoc2C)cc1	99	%PPB	PPB	Zhu et al., 2013
752	lofepramine	Clc1ccc(cc1)C(=O)CN(CCCN1c2c(CCc3c1cccc3)cccc2)C	99	%PPB	PPB	Zhu et al., 2013
753	manidipine	O(C(=O)C=1C(\C(=C(/OC)\O)\C(=NC=1C)C)c1cc([N+](=O)[O-])ccc1)CCN1CCN(CC1)C(c1ccccc1)c1ccccc1	99	%PPB	PPB	Zhu et al., 2013
754	mefenamic acid	OC(=O)c1ccccc1Nc1cccc(C)c1C	99	%PPB	PPB	Zhu et al., 2013
755	nabumetone	O(C)c1cc2c(cc(cc2)CCC(=O)C)cc1	99	%PPB	PPB	Zhu et al., 2013
756	nelfinavir	S(CC(NC(=O)c1cccc(O)c1C)C(O)CN1CC2C(CC1C(=O)NC(C)(C)C)CCCC2)c1ccccc1	99	%PPB	PPB	Zhu et al., 2013
757	orlistat	O1C(CC(OC(=O)C(NC=O)CC(C)C)CCCCCCCCCCC)C(CCCCCC)C1=O	99	%PPB	PPB	Zhu et al., 2013
758	oxyphenbutazone	Oc1ccc(N2N(C(=O)C(CCCC)C2=O)c2ccccc2)cc1	99	%PPB	PPB	Zhu et al., 2013
759	phenprocoumon	O1c2c(cccc2)C(=O)C(C(CC)c2ccccc2)=C1O	99	%PPB	PPB	Zhu et al., 2013
760	rosiglitazone	S1C(Cc2ccc(OCCN(C)c3ncccc3)cc2)C(=O)NC1=O	99	%PPB	PPB	Zhu et al., 2013
761	suprofen	s1cccc1C(=O)c1ccc(cc1)C(C(O)=O)C	99	%PPB	PPB	Zhu et al., 2013
762	tamoxifen	O(CCN(C)C)c1ccc(cc1)\C(=C(\CC)/c1ccccc1)\c1ccccc1	99	%PPB	PPB	Zhu et al., 2013
763	terbinafine	N(Cc1c2c(ccc1)cccc2)(C\C=C\C#CC(C)(C)C)C	99	%PPB	PPB	Zhu et al., 2013
764	tienilic acid	Clc1c(Cl)c(OCC(O)=O)ccc1C(=O)c1sccc1	99	%PPB	PPB	Zhu et al., 2013
765	tolcapone	Oc1c(N(O)[O-])cc(cc1O)C(=O)c1ccc(cc1)C	99	%PPB	PPB	Zhu et al., 2013
766	torasemide	S(=O)(=O)(NC(=O)NC(C)C)c1cnccc1Nc1cc(ccc1)C	99	%PPB	PPB	Zhu et al., 2013
767	warfarin	O1c2c(cccc2)C(=O)C(C(CC(=O)C)c2ccccc2)=C1O	99	%PPB	PPB	Zhu et al., 2013
768	xipamide	Clc1cc(O)c(cc1S(=O)(=O)N)C(=O)Nc1c(cccc1C)C	99	%PPB	PPB	Zhu et al., 2013
769	zafirlukast	S(=O)(=O)(NC(=O)c1cc(OC)c(cc1)Cc1c2cc(NC(OC3CCCC3)=O)ccc2n(c1)C)c1ccccc1C	99	%PPB	PPB	Zhu et al., 2013
770	ziprasidone	Clc1cc2NC(=O)Cc2cc1CCN1CCN(CC1)c1nsc2c1cccc2	99	%PPB	PPB	Zhu et al., 2013
771	etodolac	O1CCc2c([nH]c3c2cccc3CC)C1(CC(O)=O)CC	99.1	%PPB	PPB	Zhu et al., 2013
772	naproxen	O(C)c1cc2c(cc(cc2)C(C(O)=O)C)cc1	99.4	%PPB	PPB	Zhu et al., 2013
773	diclofenac acid	Clc1cccc(Cl)c1Nc1ccccc1CC(O)=O	99.5	%PPB	PPB	Zhu et al., 2013
774	suramin	S(O)(=O)(=O)c1c2c(cc(S(O)(=O)=O)c1)c(S(O)(=O)=O)ccc2NC(=O)c1cc(NC(=O)c2cc(NC(=O)Nc3cc(ccc3)C(=O)Nc3cc(ccc3C)C(=O)Nc3c4c(cc(S(O)(=O)=O)cc4S(O)(=O)=O)c(S(O)(=O)=O)cc3)ccc2)c(cc1)C	99.5	%PPB	PPB	Zhu et al., 2013
775	sulfobromophthalein	Brc1c(Br)c(Br)c2c(C(OC2=O)(c2cc(S(O)(=O)=O)c(O)cc2)c2cc(S(O)(=O)=O)c(O)cc2)c1Br	99.5	%PPB	PPB	Zhu et al., 2013
776	acitretin	O(C)c1cc(C)c(\C=C\C(=C\C=C\C(=C\C(O)=O)\C)\C)c(C)c1C	99.5	%PPB	PPB	Zhu et al., 2013
777	atovaquone	Clc1ccc(cc1)C1CCC(CC1)C=1C(=O)C(=O)c2c(cccc2)C=1O	99.5	%PPB	PPB	Zhu et al., 2013
778	cerivastatin	Fc1ccc(cc1)-c1c(COC)c(nc(C(C)C)c1\C=C\C(O)CC(O)CC(O)=O)C(C)C	99.5	%PPB	PPB	Zhu et al., 2013
779	dipyridamole	OCCN(CCO)c1nc(N2CCCCC2)c2nc(nc(N3CCCCC3)c2n1)N(CCO)CCO	99.5	%PPB	PPB	Zhu et al., 2013
780	felodipine	Clc1c(cccc1Cl)C1\C(=C(/OCC)\O)\C(=NC(C)=C1C(OC)=O)C	99.5	%PPB	PPB	Zhu et al., 2013
781	gliquidone	S(=O)(=O)(NC(=O)NC1CCCCC1)c1ccc(cc1)CCN1C(=O)C(c2c(cc(OC)cc2)C1=O)(C)C	99.5	%PPB	PPB	Zhu et al., 2013
782	ketorolac	OC(=O)C1CCn2c1ccc2C(=O)c1ccccc1	99.5	%PPB	PPB	Zhu et al., 2013
783	losartan	Clc1nc(n(Cc2ccc(cc2)-c2ccccc2-c2nn[nH]n2)c1CO)CCCC	99.5	%PPB	PPB	Zhu et al., 2013
784	medazepam	Clc1cc2c(N(CCN=C2c2ccccc2)C)cc1	99.5	%PPB	PPB	Zhu et al., 2013
785	nilvadipine	O(C(=O)c1c(-c2cc([N+](=O)[O-])ccc2)c(C(OC)=O)c(nc1C)C#N)C(C)C	99.5	%PPB	PPB	Zhu et al., 2013
786	nisoldipine	O(C(=O)c1c(-c2ccccc2N(O)[O-])c(C(OC)=O)c(nc1C)C)CC(C)C	99.5	%PPB	PPB	Zhu et al., 2013
787	norgestimate	O(C(=O)C)C1(CCC2C3C(C4C(C\C(=N/O)\CC4)CC3)CCC12CC)C#C	99.5	%PPB	PPB	Zhu et al., 2013
788	olsalazine	Oc1ccc(N=Nc2cc(C(O)=O)c(O)cc2)cc1C(O)=O	99.5	%PPB	PPB	Zhu et al., 2013
789	pioglitazone	S1C(Cc2ccc(OCCc3ncc(cc3)CC)cc2)C(=O)NC1=O	99.5	%PPB	PPB	Zhu et al., 2013
790	sertindole	Clc1cc2c(n(cc2C2CCN(CC2)CCN2CCNC2=O)-c2ccc(F)cc2)cc1	99.5	%PPB	PPB	Zhu et al., 2013
791	telmisartan	OC(=O)c1ccccc1-c1ccc(cc1)Cn1c2c(nc1CCC)c(cc(c2)-c1nc2c(n1C)cccc2)C	99.5	%PPB	PPB	Zhu et al., 2013
792	teniposide	s1cccc1C1OC2C(OC(OC3C4C(C(c5c3cc3OCOc3c5)c3cc(OC)c(O)c(OC)c3)C(OC4)=O)C(O)C2O)CO1	99.5	%PPB	PPB	Zhu et al., 2013
793	tenoxicam	s1c2c(S(=O)(=O)N(C)C(C(=O)Nc3ncccc3)=C2O)cc1	99.5	%PPB	PPB	Zhu et al., 2013
794	tesaglitazar	S(Oc1ccc(cc1)CCOc1ccc(cc1)CC(OCC)C(O)=O)(=O)(=O)C	99.5	%PPB	PPB	Zhu et al., 2013
795	thyroxine	Ic1cc(cc(I)c1Oc1cc(I)c(O)c(I)c1)CC(N)C(O)=O	99.5	%PPB	PPB	Zhu et al., 2013
796	tolmetin	OC(=O)Cc1n(C)c(cc1)C(=O)c1ccc(cc1)C	99.5	%PPB	PPB	Zhu et al., 2013
797	tolrestat	S=C(N(CC(O)=O)C)c1c2c(ccc1)c(C(F)(F)F)c(OC)cc2	99.5	%PPB	PPB	Zhu et al., 2013
798	toremifene	ClCC\C(=C(/c1ccc(OCCN(C)C)cc1)\c1ccccc1)\c1ccccc1	99.5	%PPB	PPB	Zhu et al., 2013
799	trifluoperazine	S1c2c(N(c3c1cccc3)CCCN1CCN(CC1)C)cc(cc2)C(F)(F)F	99.5	%PPB	PPB	Zhu et al., 2013
800	paramethadione	O1C(CC)(C)C(=O)N(C)C1=O	0.5	%PPB	PPB	Zhu et al., 2013
801	vigabatrin	OC(=O)CCC(N)C=C	0.5	%PPB	PPB	Zhu et al., 2013
802	glufosinate ammonium	P(O)(=O)(CCC(N)C(O)=O)C	1	%PPB	PPB	Zhu et al., 2013
803	fosfomycin	P(O)(O)(=O)C1OC1C	2	%PPB	PPB	Zhu et al., 2013
804	gemcitabine	FC1(F)C(O)C(OC1N1C=CC(=NC1=O)N)CO	2	%PPB	PPB	Zhu et al., 2013
805	didanosine	O1C(CCC1n1c2ncnc(O)c2nc1)CO	3	%PPB	PPB	Zhu et al., 2013
806	isoniazid	O=C(NN)c1ccncc1	3	%PPB	PPB	Zhu et al., 2013
807	isosorbide mononitrate	O1C2C(OCC2O)C(O[N+](O)=O)C1	3	%PPB	PPB	Zhu et al., 2013
808	dacarbazine	O=C(N)c1nc[nH]c1N=NN(C)C	5	%PPB	PPB	Zhu et al., 2013
809	guanethidine	N(CCN1CCCCCCC1)C(N)=N	5	%PPB	PPB	Zhu et al., 2013
810	zanamivir	O1C(C(O)C(O)CO)C(NC(=O)C)C(NC(N)=N)C=C1C(O)=O	5	%PPB	PPB	Zhu et al., 2013
811	carbimazole	S=C1N(C=CN1C)C(OCC)=O	7	%PPB	PPB	Zhu et al., 2013
812	hydromorphone	O1C2C34C(C(N(CC3)C)Cc3c4c1c(O)cc3)CCC2=O	7	%PPB	PPB	Zhu et al., 2013
813	oxitropium	O1C2C3[N+](C(CC(OC(=O)C(CO)c4ccccc4)C3)C12)(CC)C	7	%PPB	PPB	Zhu et al., 2013
814	arbekacin	O1C(CO)C(O)C(N)C(O)C1OC1C(O)C(OC2OC(CCC2N)CN)C(N)CC1NC(=O)C(O)CCN	8	%PPB	PPB	Zhu et al., 2013
815	barbital	O=C1NC(=O)NC(=O)C1(CC)CC	10	%PPB	PPB	Zhu et al., 2013
816	bleomycin	[S+](CCCNC(=O)c1nc(sc1)-c1nc(sc1)CCNC(=O)C(NC(=O)C(C(O)C(NC(=O)C(NC(=O)c1nc(nc(N)c1C)C(NCC(N)C(=O)N)CC(=O)N)C(OC1OC(CO)C(O)C(O)C1OC1OC(CO)C(O)C(OC(=O)N)C1O)c1nc[nH]c1)C)C)C(O)C)(C)C	10	%PPB	PPB	Zhu et al., 2013
817	lisinopril	OC(=O)C1N(CCC1)C(=O)C(NC(CCc1ccccc1)C(O)=O)CCCCN	10	%PPB	PPB	Zhu et al., 2013
818	metronidazole	OCCn1c(ncc1[N+](=O)[O-])C	10	%PPB	PPB	Zhu et al., 2013
819	netilmicin	O1C(OC2C(O)C(OC3OCC(O)(C)C(NC)C3O)C(NCC)CC2N)C(N)CC=C1CN	10	%PPB	PPB	Zhu et al., 2013
820	pirenzepine	O=C1Nc2cccnc2N(c2c1cccc2)C(=O)CN1CCN(CC1)C	10	%PPB	PPB	Zhu et al., 2013
821	timolol	s1nc(N2CCOCC2)c(OCC(O)CNC(C)(C)C)n1	10	%PPB	PPB	Zhu et al., 2013
822	lomefloxacin	Fc1c2N(C=C(C(O)=O)C(=O)c2cc(F)c1N1CC(NCC1)C)CC	12	%PPB	PPB	Zhu et al., 2013
823	penicillin31	S1C2N(C(C(O)=O)C1(C)C)C(=O)C2NC(=O)C(N)c1cc(N)ccc1	12	%PPB	PPB	Zhu et al., 2013
824	tocainide	O=C(Nc1c(cccc1C)C)C(N)C	13	%PPB	PPB	Zhu et al., 2013
825	tramadol	O(C)c1cc(ccc1)C1(O)CCCCC1CN(C)C	13	%PPB	PPB	Zhu et al., 2013
826	amdinocillin	S1C2N(C(C(O)=O)C1(C)C)C(=O)C2\N=C\N1CCCCCC1	14	%PPB	PPB	Zhu et al., 2013
827	cytarabine	O1C(CO)C(O)C(O)C1N1C=CC(=NC1=O)N	14	%PPB	PPB	Zhu et al., 2013
828	norfloxacin	Fc1cc2c(N(C=C(C(O)=O)C2=O)CC)cc1N1CCNCC1	15	%PPB	PPB	Zhu et al., 2013
829	cevimeline	S1CC2(OC1C)C1CCN(C2)CC1	15	%PPB	PPB	Zhu et al., 2013
830	metildigoxin	O1C(C)C(OC2OC(C)C(OC)C(O)C2)C(O)CC1OC1C(OC(OC2CC3CCC4C(CC(O)C5(C)C(CCC45O)C4=CC(OC4)=O)C3(CC2)C)CC1O)C	15	%PPB	PPB	Zhu et al., 2013
831	ornidazole	ClCC(O)Cn1c(ncc1[N+](=O)[O-])C	15	%PPB	PPB	Zhu et al., 2013
832	topiramate	S(OCC12OC(OC1C1OC(OC1CO2)(C)C)(C)C)(=O)(=O)N	15	%PPB	PPB	Zhu et al., 2013
833	amisulpride	S(=O)(=O)(CC)c1cc(C(=O)NCC2N(CCC2)CC)c(OC)cc1N	16	%PPB	PPB	Zhu et al., 2013
834	phenformin	N(=C(\NCCc1ccccc1)/N)/C(N)=N	16	%PPB	PPB	Zhu et al., 2013
835	procainamide	O=C(NCCN(CC)CC)c1ccc(N)cc1	17	%PPB	PPB	Zhu et al., 2013
836	galantamine	O1c2c3C4(C1CC(O)C=C4)CCN(Cc3ccc2OC)C	18	%PPB	PPB	Zhu et al., 2013
837	valacyclovir	Oc1nc(nc2n(cnc12)COCCOC(=O)C(N)C(C)C)N	18	%PPB	PPB	Zhu et al., 2013
838	amoxicillin	S1C2N(C(C(O)=O)C1(C)C)C(=O)C2NC(=O)C(N)c1ccc(O)cc1	19	%PPB	PPB	Zhu et al., 2013
839	cladribine	Clc1nc(N)c2ncn(c2n1)C1OC(CO)C(O)C1	20	%PPB	PPB	Zhu et al., 2013
840	gentamicin	O1C(OC2C(O)C(OC3OCC(O)(C)C(NC)C3O)C(N)CC2N)C(N)CCC1C(NC)C	20	%PPB	PPB	Zhu et al., 2013
841	meprobamate	O(CC(CCC)(COC(=O)N)C)C(=O)N	20	%PPB	PPB	Zhu et al., 2013
842	terbutaline	Oc1cc(cc(O)c1)C(O)CNC(C)(C)C	21	%PPB	PPB	Zhu et al., 2013
843	cefsulodin	S1C2N(C(=O)C2NC(=O)C(S(O)(=O)=O)c2ccccc2)C(C(O)=O)=C(C1)C[n+]1ccc(cc1)C(=O)N	23	%PPB	PPB	Zhu et al., 2013
844	cilazapril	O=C1N2N(CCCC1NC(CCc1ccccc1)C(OCC)=O)CCCC2C(O)=O	25	%PPB	PPB	Zhu et al., 2013
845	clonidine	Clc1cccc(Cl)c1NC=1NCCN=1	25	%PPB	PPB	Zhu et al., 2013
846	etilefrin	Oc1cc(ccc1)C(O)CNCC	25	%PPB	PPB	Zhu et al., 2013
847	nicorandil	O([N+](=O)[O-])CCNC(=O)c1cccnc1	25	%PPB	PPB	Zhu et al., 2013
848	sulpiride	S(=O)(=O)(N)c1cc(C(=O)NCC2N(CCC2)CC)c(OC)cc1	25	%PPB	PPB	Zhu et al., 2013
849	tilidine	O(C(=O)C1(CCC=CC1CN(C)C)c1ccccc1)CC	25	%PPB	PPB	Zhu et al., 2013
850	levofloxacin	Fc1cc2c3N(C=C(C(O)=O)C2=O)C(COc3c1N1CCN(CC1)C)C	25	%PPB	PPB	Zhu et al., 2013
851	penicillin30	S1C2N(C(C(O)=O)C1(C)C)C(=O)C2NC(=O)C(F)c1cc(N)ccc1	26	%PPB	PPB	Zhu et al., 2013
852	meptazinol	Oc1cc(ccc1)C1(CCCCN(C1)C)CC	27	%PPB	PPB	Zhu et al., 2013
853	ceftizoxime	s1cc(nc1N)/C(=N/OC)/C(=O)NC1C2SCC=C(N2C1=O)C(O)=O	29	%PPB	PPB	Zhu et al., 2013
854	nizatidine	s1cc(nc1CN(C)C)CSCCN\C(\NC)=C\[N+](=O)[O-]	29	%PPB	PPB	Zhu et al., 2013
855	alfadolone	OC1CC2CCC3C(C2(CC1)C)C(=O)CC1(C3CCC1C(=O)CO)C	30	%PPB	PPB	Zhu et al., 2013
856	baclofen	Clc1ccc(cc1)C(CC(O)=O)CN	30	%PPB	PPB	Zhu et al., 2013
857	capecitabine	FC1=CN(C2OC(C)C(O)C2O)C(=O)N=C1NC(OCCCCC)=O	30	%PPB	PPB	Zhu et al., 2013
858	deferiprone	OC=1C(=N)C=CN(C)C=1C	33	%PPB	PPB	Zhu et al., 2013
859	ibomal	BrC(CC1(C(C)C)C(=O)NC(=O)NC1=O)=C	34	%PPB	PPB	Zhu et al., 2013
860	azithromycin	O1C(CC)C(O)(C)C(O)C(N(CC(CC(O)(C)C(OC2OC(CC(N(C)C)C2O)C)C(C)C(OC2OC(C)C(O)C(OC)(C2)C)C(C)C1=O)C)C)C	35	%PPB	PPB	Zhu et al., 2013
861	carbidopa	Oc1cc(ccc1O)CC(NN)(C(O)=O)C	36	%PPB	PPB	Zhu et al., 2013
862	lamivudine	S1CC(OC1CO)N1C=CC(=NC1=O)N	36	%PPB	PPB	Zhu et al., 2013
863	cefprozil	S1C2N(C(=O)C2NC(=O)C(N)c2ccc(O)cc2)C(C(O)=O)=C(C1)\C=C\C	36	%PPB	PPB	Zhu et al., 2013
864	deflazacort	O1C2CC3C4C(C5(C(=CC(=O)C=C5)CC4)C)C(O)CC3(C)C2(N=C1C)C(=O)COC(=O)C	40	%PPB	PPB	Zhu et al., 2013
865	levorphanol	Oc1cc2C34C(C(N(CC3)C)Cc2cc1)CCCC4	40	%PPB	PPB	Zhu et al., 2013
866	ropinirole	O=C1Nc2c(C1)c(ccc2)CCN(CCC)CCC	40	%PPB	PPB	Zhu et al., 2013
867	zonisamide	S(=O)(=O)(N)Cc1noc2c1cccc2	40	%PPB	PPB	Zhu et al., 2013
868	naloxone	O1C2C34CCN(C(Cc5c3c1c(O)cc5)C4(O)CCC2=O)CC=C	45	%PPB	PPB	Zhu et al., 2013
869	tubocurarine	O1c2cc3C(N(CCc3cc2OC)C)Cc2ccc(Oc3c4C([N+](CCc4cc(OC)c3O)(C)C)Cc3cc1c(O)cc3)cc2	45	%PPB	PPB	Zhu et al., 2013
870	zopiclone	Clc1ccc(N2C(OC(=O)N3CCN(CC3)C)c3nccnc3C2=O)cc1	45	%PPB	PPB	Zhu et al., 2013
871	hexobarbital	O=C1N(C)C(=O)NC(=O)C1(C)C=1CCCCC=1	48	%PPB	PPB	Zhu et al., 2013
872	pravastatin	O(C(=O)C(CC)C)C1C2C(=CC(O)C1)C=CC(C)C2CCC(O)CC(O)CC(O)=O	50	%PPB	PPB	Zhu et al., 2013
873	hydroxychloroquine	Clc1cc2nccc(NC(CCCN(CCO)CC)C)c2cc1	50	%PPB	PPB	Zhu et al., 2013
874	melperone	Fc1ccc(cc1)C(=O)CCCN1CCC(CC1)C	50	%PPB	PPB	Zhu et al., 2013
875	reproterol	Oc1cc(cc(O)c1)C(O)CNCCCn1c2c(nc1)N(C)C(=O)N(C)C2=O	50	%PPB	PPB	Zhu et al., 2013
876	demeclocycline	Clc1c2c(C(O)=C3C(CC4C(O)(C(O)=C(C(=O)N)C(=O)C4N(C)C)C3=O)C2O)c(O)cc1	54	%PPB	PPB	Zhu et al., 2013
877	phentolamine	Oc1cc(N(CC=2NCCN=2)c2ccc(cc2)C)ccc1	54	%PPB	PPB	Zhu et al., 2013
878	levocabastine	Fc1ccc(cc1)C1(CCC(N2CC(C)C(CC2)(C(O)=O)c2ccccc2)CC1)C#N	55	%PPB	PPB	Zhu et al., 2013
879	penicillin28	Clc1ccc(cc1)C(N)C(=O)NC1C2SC(C)(C)C(N2C1=O)C(O)=O	55	%PPB	PPB	Zhu et al., 2013
880	tacrine	n1c2c(CCCC2)c(N)c2c1cccc2	55	%PPB	PPB	Zhu et al., 2013
881	cetirizine	Clc1ccc(cc1)C(N1CCN(CC1)CCOCC(O)=O)c1ccccc1	55	%PPB	PPB	Zhu et al., 2013
882	ticarcillin	S1C2N(C(C(O)=O)C1(C)C)C(=O)C2NC(=O)C(C(O)=O)c1ccsc1	58	%PPB	PPB	Zhu et al., 2013
883	letrozole	n1cn(nc1)C(c1ccc(cc1)C#N)c1ccc(cc1)C#N	60	%PPB	PPB	Zhu et al., 2013
884	nitroglycerin	O([N+](=O)[O-])C(CO[N+](=O)[O-])CO[N+](=O)[O-]	60	%PPB	PPB	Zhu et al., 2013
885	penicillin27	S1C2N(C(C(O)=O)C1(C)C)C(=O)C2NC(=O)C(N)c1ccc(cc1)C	60	%PPB	PPB	Zhu et al., 2013
886	penicillin46	S1C2N(C(C(O)=O)C1(C)C)C(=O)C2NC(=O)C(OC)c1cc([N+](=O)[O-])ccc1	60	%PPB	PPB	Zhu et al., 2013
887	aprobarbital	O=C1NC(=O)NC(=O)C1(C(C)C)CC=C	62	%PPB	PPB	Zhu et al., 2013
888	penicillin38	S1C2N(C(C(O)=O)C1(C)C)C(=O)C2NC(=O)C(OC)c1ccccc1	62	%PPB	PPB	Zhu et al., 2013
889	nitrofurantoin	o1c(ccc1[N+](=O)[O-])\C=N\N1CC(=O)NC1=O	63	%PPB	PPB	Zhu et al., 2013
890	mexiletine	O(CC(N)C)c1c(cccc1C)C	63	%PPB	PPB	Zhu et al., 2013
891	bopindolol	O(CC(OC(=O)c1ccccc1)CNC(C)(C)C)c1c2cc([nH]c2ccc1)C	65	%PPB	PPB	Zhu et al., 2013
892	cefdinir	s1cc(nc1N)/C(=N/O)/C(=O)NC1C2SCC(C=C)=C(N2C1=O)C(O)=O	65	%PPB	PPB	Zhu et al., 2013
893	fexofenadine	OC(C1CCN(CC1)CCCC(O)c1ccc(cc1)C(C(O)=O)(C)C)(c1ccccc1)c1ccccc1	65	%PPB	PPB	Zhu et al., 2013
894	mefruside	Clc1ccc(S(=O)(=O)N(CC2(OCCC2)C)C)cc1S(=O)(=O)N	65	%PPB	PPB	Zhu et al., 2013
895	octreotide	S1SCC(NC(=O)C(NC(=O)C(NC(=O)C(NC(=O)C(NC(=O)C(NC(=O)C(N)Cc2ccccc2)C1)Cc1ccccc1)Cc1c2c([nH]c1)cccc2)CCCCN)C(O)C)C(=O)NC(C(O)C)CO	65	%PPB	PPB	Zhu et al., 2013
896	paclitaxel	O1C2CC(O)C3(C(C(OC(=O)c4ccccc4)C4(O)CC(OC(=O)C(O)C(NC(=O)c5ccccc5)c5ccccc5)C(=C(C4(C)C)C(OC(=O)C)C3=O)C)C2(OC(=O)C)C1)C	65	%PPB	PPB	Zhu et al., 2013
897	penicillin45	S1C2N(C(C(O)=O)C1(C)C)C(=O)C2NC(=O)C(OC)c1cc(F)ccc1	65	%PPB	PPB	Zhu et al., 2013
898	amantadine	NC12CC3CC(C1)CC(C2)C3	66	%PPB	PPB	Zhu et al., 2013
899	penicillin13	S1C2N(C(C(O)=O)C1(C)C)C(=O)C2NC(=O)C(N)CCCCCC	66	%PPB	PPB	Zhu et al., 2013
900	sulfamethoxazole	S(=O)(=O)(Nc1noc(c1)C)c1ccc(N)cc1	69.5	%PPB	PPB	Zhu et al., 2013
901	albendazole sulfoxide	S(=O)(CCC)c1cc2nc([nH]c2cc1)NC(OC)=O	70	%PPB	PPB	Zhu et al., 2013
902	encainide	O(C)c1ccc(cc1)C(=O)Nc1ccccc1CCC1N(CCCC1)C	70	%PPB	PPB	Zhu et al., 2013
903	tetrazepam	Clc1cc2c(N(C)C(=O)CN=C2C=2CCCCC=2)cc1	70	%PPB	PPB	Zhu et al., 2013
904	cefoxitin	s1cccc1CC(=O)NC1C2SCC(COC(=O)N)=C(N2C1=O)C(O)=O	72	%PPB	PPB	Zhu et al., 2013
905	everolimus	O1C(CC(=O)C(\C=C(/C)\C(O)C(OC)C(=O)C(CC(\C=C\C=C\C=C(/C)\C(OC)CC2OC(O)(C(=O)C(=O)N3C(CCCC3)C1=O)C(CC2)C)C)C)C)C(CC1CC(OC)C(OCCO)CC1)C	74	%PPB	PPB	Zhu et al., 2013
906	propoxyphene	O(C(Cc1ccccc1)(C(CN(C)C)C)c1ccccc1)C(=O)CC	75	%PPB	PPB	Zhu et al., 2013
907	sulfamethoxypyridazine	S(=O)(=O)(Nc1nnc(OC)cc1)c1ccc(N)cc1	75	%PPB	PPB	Zhu et al., 2013
908	methohexital	O=C1N(C)C(=O)NC(=O)C1(C(C#CCC)C)CC=C	77	%PPB	PPB	Zhu et al., 2013
909	flunitrazepam	Fc1ccccc1C1=NCC(=O)N(c2c1cc([N+](=O)[O-])cc2)C	79	%PPB	PPB	Zhu et al., 2013
910	calcifediol	OC1C\C(=C/C=C\2/C3CCC(C(CCCC(O)(C)C)C)C3(CCC/2)C)\C(CC1)=C	80	%PPB	PPB	Zhu et al., 2013
911	nafarelin	Oc1ccc(cc1)CC(NC(=O)C(NC(=O)C(NC(=O)C(NC(=O)C1NC(=O)CC1)Cc1nc[nH]c1)Cc1c2c([nH]c1)cccc2)CO)C(=O)NC(Cc1cc2c(cc1)cccc2)C(=O)NC(CC(C)C)C(=O)NC(CCC\N=C(\N)/N)C(=O)N1CCCC1C(=O)NCC(=O)N	80	%PPB	PPB	Zhu et al., 2013
912	norethisterone	OC1(CCC2C3C(C4C(=CC(=O)CC4)CC3)CCC12C)C#C	80	%PPB	PPB	Zhu et al., 2013
913	penicillin62	S1C2N(C(C(O)=O)C1(C)C)C(=O)C2NC(=O)C(Oc1ccc(F)cc1)C	80	%PPB	PPB	Zhu et al., 2013
914	diltiazem	S1c2c(N(CCN(C)C)C(=O)C(OC(=O)C)C1c1ccc(OC)cc1)cccc2	81	%PPB	PPB	Zhu et al., 2013
915	doxepin	O1Cc2c(cccc2)\C(\c2c1cccc2)=C\CCN(C)C	82	%PPB	PPB	Zhu et al., 2013
916	penicillin48	S1C2N(C(C(O)=O)C1(C)C)C(=O)C2NC(=O)C(Oc1ccccc1)C	82	%PPB	PPB	Zhu et al., 2013
917	penicillin40	Clc1cc(ccc1)C(OC)C(=O)NC1C2SC(C)(C)C(N2C1=O)C(O)=O	83	%PPB	PPB	Zhu et al., 2013
918	praziquantel	O=C1N2C(c3c(CC2)cccc3)CN(C1)C(=O)C1CCCCC1	83	%PPB	PPB	Zhu et al., 2013
919	methacycline	OC12C(C(N(C)C)C(=O)C(C(=O)N)=C1O)C(O)C1C(C2=O)=C(O)c2c(cccc2O)C1=C	84	%PPB	PPB	Zhu et al., 2013
920	17-hydroxyprogesterone	OC1(CCC2C3C(CCC12C)C1(C(=CC(=O)CC1)CC3)C)C(=O)C	85	%PPB	PPB	Zhu et al., 2013
921	debrisoquine	NC(=N)N1CCc2c(C1)cccc2	85	%PPB	PPB	Zhu et al., 2013
922	niridazole	s1c([N+](=O)[O-])cnc1N1CCNC1=O	85	%PPB	PPB	Zhu et al., 2013
923	vinorelbine	O(C(=O)C)C1C2(C3N(CCC34C(N(c3cc(OC)c(cc34)C3(CC4C=C(CN(C4)Cc4c3[nH]c3c4cccc3)CC)C(OC)=O)C)C1(O)C(OC)=O)CC=C2)CC	85	%PPB	PPB	Zhu et al., 2013
924	imipramine	N(CCCN1c2c(CCc3c1cccc3)cccc2)(C)C	88	%PPB	PPB	Zhu et al., 2013
925	prednisolone	OC1(CCC2C3C(C4(C(=CC(=O)C=C4)CC3)C)C(O)CC12C)C(=O)CO	88	%PPB	PPB	Zhu et al., 2013
926	methadone	O=C(C(CC(N(C)C)C)(c1ccccc1)c1ccccc1)CC	89	%PPB	PPB	Zhu et al., 2013
927	ambroxol	Brc1cc(Br)cc(CNC2CCC(O)CC2)c1N	90	%PPB	PPB	Zhu et al., 2013
928	brotizolam	Brc1sc2-n3c(nnc3C)CN=C(c2c1)c1cc(Cl)ccc1	90	%PPB	PPB	Zhu et al., 2013
929	flutamide	FC(F)(F)c1cc(NC(=O)C(C)C)ccc1[N+](=O)[O-]	90	%PPB	PPB	Zhu et al., 2013
930	idebenone	O(C)C=1C(=O)C(CCCCCCCCCCO)=C(C)C(=O)C=1OC	90	%PPB	PPB	Zhu et al., 2013
931	lysergide	O=C(N(CC)CC)C1C=C2C(N(C1)C)Cc1c3c2cccc3[nH]c1	90	%PPB	PPB	Zhu et al., 2013
932	penicillin74	Brc1sc(cc1)C(OC)CC(=O)NC1C2SC(C)(C)C(N2C1=O)C(O)=O	90	%PPB	PPB	Zhu et al., 2013
933	probenecid	S(=O)(=O)(N(CCC)CCC)c1ccc(cc1)C(O)=O	90	%PPB	PPB	Zhu et al., 2013
934	tiludronic acid	Clc1ccc(SC(P(O)(O)=O)P(O)(O)=O)cc1	90	%PPB	PPB	Zhu et al., 2013
935	medroxyprogesterone	O(C(=O)C)C1(CCC2C3C(CCC12C)C1(C(=CC(=O)CC1)C(C3)C)C)C(=O)C	90	%PPB	PPB	Zhu et al., 2013
936	cefoperazone	S1C2N(C(=O)C2NC(=O)C(NC(=O)N2CCN(CC)C(=O)C2=O)c2ccc(O)cc2)C(C(O)=O)=C(C1)CSc1ncnn1C	91	%PPB	PPB	Zhu et al., 2013
937	clorazepic acid	Clc1cc2c(NC(=O)C(N=C2c2ccccc2)C(O)=O)cc1	91	%PPB	PPB	Zhu et al., 2013
938	gliclazide	S(=O)(=O)(NC(=O)NN1CC2C(CCC2)C1)c1ccc(cc1)C	91	%PPB	PPB	Zhu et al., 2013
939	terazosin	O1CCCC1C(=O)N1CCN(CC1)c1nc(N)c2cc(OC)c(OC)cc2n1	91	%PPB	PPB	Zhu et al., 2013
940	tolamolol	O(CC(O)CNCCOc1ccc(cc1)C(=O)N)c1ccccc1C	91	%PPB	PPB	Zhu et al., 2013
941	perphenazine	Clc1cc2N(c3c(Sc2cc1)cccc3)CCCN1CCN(CC1)CCO	92	%PPB	PPB	Zhu et al., 2013
942	dihydroergotamine	O1C(NC(=O)C2CC3C(N(C2)C)Cc2c4c3cccc4[nH]c2)(C)C(=O)N2C(Cc3ccccc3)C(=O)N3C(CCC3)C12O	93	%PPB	PPB	Zhu et al., 2013
943	olanzapine	s1c2Nc3c(N=C(N4CCN(CC4)C)c2cc1C)cccc3	93	%PPB	PPB	Zhu et al., 2013
944	sulindac	S(=O)(C)c1ccc(cc1)\C=C/1\c2c(cc(F)cc2)C(CC(O)=O)=C\1C	93	%PPB	PPB	Zhu et al., 2013
945	zolpidem	O=C(N(C)C)Cc1n2C=C(C=Cc2nc1-c1ccc(cc1)C)C	93	%PPB	PPB	Zhu et al., 2013
946	clindamycin	ClC(C(NC(=O)C1N(CC(C1)CCC)C)C1OC(SC)C(O)C(O)C1O)C	94	%PPB	PPB	Zhu et al., 2013
947	etidocaine	O=C(Nc1c(cccc1C)C)C(N(CCC)CC)CC	94	%PPB	PPB	Zhu et al., 2013
948	penicillin20	S1C2N(C(C(O)=O)C1(C)C)C(=O)C2NC(=O)C(CC)(CC)CC	94	%PPB	PPB	Zhu et al., 2013
949	penicillin24	Clc1ccc(cc1)C(Cl)C(=O)NC1C2SC(C)(C)C(N2C1=O)C(O)=O	94	%PPB	PPB	Zhu et al., 2013
950	ropivacaine	O=C(Nc1c(cccc1C)C)C1N(CCCC1)CCC	94	%PPB	PPB	Zhu et al., 2013
951	amithiozone	S=C(N\N=C\c1ccc(NC(=O)C)cc1)N	95	%PPB	PPB	Zhu et al., 2013
952	amitriptyline	N(CC\C=C/1\c2c(CCc3c\1cccc3)cccc2)(C)C	95	%PPB	PPB	Zhu et al., 2013
953	cortisone acetate	OC1(CCC2C3C(C4(C(=CC(=O)CC4)CC3)C)C(=O)CC12C)C(=O)COC(=O)C	95	%PPB	PPB	Zhu et al., 2013
954	doxazosin	O1c2c(OCC1C(=O)N1CCN(CC1)c1nc(N)c3cc(OC)c(OC)cc3n1)cccc2	95	%PPB	PPB	Zhu et al., 2013
955	fendiline	N(C(C)c1ccccc1)CCC(c1ccccc1)c1ccccc1	95	%PPB	PPB	Zhu et al., 2013
956	paroxetine	Fc1ccc(cc1)C1CCNCC1COc1cc2OCOc2cc1	95	%PPB	PPB	Zhu et al., 2013
957	tianeptine	Clc1cc2S(=O)(=O)N(c3c(cccc3)C(NCCCCCCC(O)=O)c2cc1)C	95	%PPB	PPB	Zhu et al., 2013
958	valsartan	OC(=O)C(N(Cc1ccc(cc1)-c1ccccc1-c1nn[nH]n1)C(=O)CCCC)C(C)C	95	%PPB	PPB	Zhu et al., 2013
959	isradipine	o1nc2c(n1)cccc2C1\C(=C(/OC)\O)\C(=NC(C)=C1C(OC(C)C)=O)C	95	%PPB	PPB	Zhu et al., 2013
960	buprenorphine	O1C2C34C5(CC(C(O)(C(C)(C)C)C)C2(OC)CC5)C(N(CC3)CC2CC2)Cc2c4c1c(O)cc2	96	%PPB	PPB	Zhu et al., 2013
961	midazolam	Clc1cc2c(-n3c(CN=C2c2ccccc2F)cnc3C)cc1	96	%PPB	PPB	Zhu et al., 2013
962	mupirocin	O1C(CC2COC(C\C(=C\C(OCCCCCCCCC(O)=O)=O)\C)C(O)C2O)C1C(C(O)C)C	96	%PPB	PPB	Zhu et al., 2013
963	penicillin57	Clc1cccc(Cl)c1OC(C(=O)NC1C2SC(C)(C)C(N2C1=O)C(O)=O)C	96	%PPB	PPB	Zhu et al., 2013
964	tolbutamide	S(=O)(=O)(NC(=O)NCCCC)c1ccc(cc1)C	96	%PPB	PPB	Zhu et al., 2013
965	cilostazol	O(CCCCc1nnnn1C1CCCCC1)c1cc2CCC(=O)Nc2cc1	96.5	%PPB	PPB	Zhu et al., 2013
966	bunazosin	O(C)c1cc2c(nc(nc2N)N2CCCN(CC2)C(=O)CCC)cc1OC	97	%PPB	PPB	Zhu et al., 2013
967	clomipramine	Clc1cc2N(c3c(CCc2cc1)cccc3)CCCN(C)C	97	%PPB	PPB	Zhu et al., 2013
968	penicillin70	S1C2N(C(C(O)=O)C1(C)C)C(=O)C2NC(=O)C(Oc1c2c(ccc1)cccc2)C	97	%PPB	PPB	Zhu et al., 2013
969	prenylamine	N(C(Cc1ccccc1)C)CCC(c1ccccc1)c1ccccc1	97	%PPB	PPB	Zhu et al., 2013
970	raloxifene	s1c2c(ccc(O)c2)c(C(=O)c2ccc(OCCN3CCCCC3)cc2)c1-c1ccc(O)cc1	97	%PPB	PPB	Zhu et al., 2013
971	17-α-estradiol	OC1CCC2C3C(CCC12C)c1c(cc(O)cc1)CC3	98	%PPB	PPB	Zhu et al., 2013
972	acenocoumarol	O1c2c(cccc2)C(=O)C(C(CC(=O)C)c2ccc([N+](=O)[O-])cc2)=C1O	98	%PPB	PPB	Zhu et al., 2013
973	fosinoprilat	P(O)(=O)(CCCCc1ccccc1)CC(=O)N1CC(CC1C(O)=O)C1CCCCC1	98	%PPB	PPB	Zhu et al., 2013
974	liothyronine	Ic1cc(cc(I)c1Oc1cc(I)c(O)cc1)CC(N)C(O)=O	98	%PPB	PPB	Zhu et al., 2013
975	nicardipine	O(C(=O)C=1C(\C(=C(/OC)\O)\C(=NC=1C)C)c1cc([N+](=O)[O-])ccc1)CCN(Cc1ccccc1)C	98	%PPB	PPB	Zhu et al., 2013
976	spironolactone	S(C(=O)C)C1C2C(CCC3C2CCC23OC(=O)CC2)C2(C(C1)=CC(=O)CC2)C	98	%PPB	PPB	Zhu et al., 2013
977	sertraline	Clc1cc(ccc1Cl)C1CCC(NC)c2c1cccc2	98	%PPB	PPB	Zhu et al., 2013
978	ritonavir	s1cncc1COC(=O)NC(Cc1ccccc1)C(O)CC(NC(=O)C(NC(=O)N(Cc1nc(sc1)C(C)C)C)C(C)C)Cc1ccccc1	98.5	%PPB	PPB	Zhu et al., 2013
979	tacrolimus	O1C(/C(=C/C2CC(OC)C(O)CC2)/C)C(C)C(O)CC(=O)C(\C=C(\CC(CC(OC)C2OC(O)(C(=O)C(=O)N3C(CCCC3)C1=O)C(CC2OC)C)C)/C)CC=C	99	%PPB	PPB	Zhu et al., 2013
980	dicamba	Clc1ccc(Cl)c(OC)c1C(O)=O	99	%PPB	PPB	Zhu et al., 2013
981	diflunisal	Fc1cc(F)ccc1-c1cc(C(O)=O)c(O)cc1	99	%PPB	PPB	Zhu et al., 2013
982	fenoprofen	O(c1cc(ccc1)C(C(O)=O)C)c1ccccc1	99	%PPB	PPB	Zhu et al., 2013
983	flurbiprofen	Fc1cc(ccc1-c1ccccc1)C(C(O)=O)C	99	%PPB	PPB	Zhu et al., 2013
984	indoprofen	O=C1N(Cc2c1cccc2)c1ccc(cc1)C(C(O)=O)C	99	%PPB	PPB	Zhu et al., 2013
985	lopinavir	O(CC(=O)NC(Cc1ccccc1)C(O)CC(NC(=O)C(N1CCCNC1=O)C(C)C)Cc1ccccc1)c1c(cccc1C)C	99	%PPB	PPB	Zhu et al., 2013
986	mibefradil	Fc1cc2c(cc1)C(C(C)C)C(OC(=O)COC)(CC2)CCN(CCCc1[nH]c2c(n1)cccc2)C	99	%PPB	PPB	Zhu et al., 2013
987	montelukast	Clc1cc2nc(ccc2cc1)\C=C\c1cc(ccc1)C(SCC1(CC1)CC(O)=O)CCc1ccccc1C(O)(C)C	99	%PPB	PPB	Zhu et al., 2013
988	nefazodone	Clc1cc(N2CCN(CC2)CCCN2N=C(N(CCOc3ccccc3)C2=O)CC)ccc1	99	%PPB	PPB	Zhu et al., 2013
989	pentachlorophenol	Clc1c(O)c(Cl)c(Cl)c(Cl)c1Cl	99	%PPB	PPB	Zhu et al., 2013
990	piroxicam	S1(=O)(=O)N(C)C(C(=O)Nc2ncccc2)=C(O)c2c1cccc2	99	%PPB	PPB	Zhu et al., 2013
991	Meloxicam	s1c(cnc1NC(=O)C=1N(S(=O)(=O)c2c(cccc2)C=1O)C)C	99.4	%PPB	PPB	Zhu et al., 2013
992	carbenoxolone	O(C(=O)CCC(O)=O)C1CCC2(C3C(CCC2C1(C)C)(C)C1(C(C2CC(CCC2(CC1)C)(C(O)=O)C)=CC3=O)C)C	99.5	%PPB	PPB	Zhu et al., 2013
993	hepe	OC(\C=C\C=C\C\C=C\C\C=C\C\C=C\CC)CCCC(O)=O	99.5	%PPB	PPB	Zhu et al., 2013
994	itraconazole	Clc1cc(Cl)ccc1C1(OC(CO1)COc1ccc(N2CCN(CC2)c2ccc(N3C=NN(C(CC)C)C3=O)cc2)cc1)Cn1ncnc1	99.5	%PPB	PPB	Zhu et al., 2013
995	tebufelone	Oc1c(cc(cc1C(C)(C)C)C(=O)CCCC#C)C(C)(C)C	99.5	%PPB	PPB	Zhu et al., 2013
996	tolfenamic acid	Clc2cccc(Nc1ccccc1C(=O)O)c2C	99.5	%PPB	PPB	Zhu et al., 2013
997	troglitazone	S1C(Cc2ccc(OCC3(Oc4c(CC3)c(C)c(O)c(C)c4C)C)cc2)C(=O)NC1=O	99.5	%PPB	PPB	Zhu et al., 2013
998	decitabine	O1C(CO)C(O)CC1N1C=NC(=NC1=O)N	0.5	%PPB	PPB	Zhu et al., 2013
999	gadoversetamide	O(CCNC(=O)CN(CCN(CCN(CC(=O)NCCOC)CC(O)=O)CC(O)=O)CC(O)=O)C	0.5	%PPB	PPB	Zhu et al., 2013
1000	iopamidol	Ic1c(C(=O)NC(CO)CO)c(I)c(NC(=O)C(O)C)c(I)c1C(=O)NC(CO)CO	0.5	%PPB	PPB	Zhu et al., 2013
1001	metrizoate	Ic1c(C(O)=O)c(I)c(NC(=O)C)c(I)c1N(C(=O)C)C	0.5	%PPB	PPB	Zhu et al., 2013
1002	pseudoephedrine	OC(C(NC)C)c1ccccc1	0.5	%PPB	PPB	Zhu et al., 2013
1003	Miglustat	OC1C(O)C(O)CN(CCCC)C1CO	1	%PPB	PPB	Zhu et al., 2013
1004	Pilocarpine	O1CC(Cc2n(cnc2)C)C(CC)C1=O	1	%PPB	PPB	Zhu et al., 2013
1005	Isosorbide 5-Mononitrate	O1CC(O[N+](=O)[O-])(O)C2OCCC12	1	%PPB	PPB	Zhu et al., 2013
1006	iopromide	Ic1c(C(=O)N(CC(O)CO)C)c(I)c(NC(=O)COC)c(I)c1C(=O)NCC(O)CO	1	%PPB	PPB	Zhu et al., 2013
1007	Iothalamic acid	Ic1c(C(=O)NC)c(I)c(NC(=O)C)c(I)c1C(O)=O	2	%PPB	PPB	Zhu et al., 2013
1008	pipecuronium	O(C(=O)C)C1C2(C(CC1N1CC[N+](CC1)(C)C)C1C(CC2)C2(CC(N3CC[N+](CC3)(C)C)C(OC(=O)C)CC2CC1)C)C	2	%PPB	PPB	Zhu et al., 2013
1009	adefovir	P(O)(O)(=O)COCCn1c2ncnc(N)c2nc1	4	%PPB	PPB	Zhu et al., 2013
1010	clinafloxacin	Clc1c2N(C=C(C(O)=O)C(=O)c2cc(F)c1N1CC(N)CC1)C1CC1	4	%PPB	PPB	Zhu et al., 2013
1011	sematilide	S(=O)(=O)(Nc1ccc(cc1)C(=O)NCCN(CC)CC)C	4	%PPB	PPB	Zhu et al., 2013
1012	isepamicin	O1C(CN)C(O)C(O)C(O)C1OC1C(O)C(OC2OCC(O)(C)C(NC)C2O)C(NC(=O)C(O)CN)CC1N	5	%PPB	PPB	Zhu et al., 2013
1013	lamifiban	O(CC(O)=O)C1CCN(CC1)C(=O)C(NC(=O)c1ccc(cc1)C(N)=N)Cc1ccc(O)cc1	6	%PPB	PPB	Zhu et al., 2013
1014	Topotecan Carboxylic Acid	Oc1ccc2nc3C=4N(Cc3cc2c1CN(C)C)C(=O)C(CO)=C(C=4)C(O)(CC)C(O)=O	6.6	%PPB	PPB	Zhu et al., 2013
1015	melagatran	OC(=O)CNC(C(=O)N1CCC1C(=O)NCc1ccc(cc1)C(N)=N)C1CCCCC1	7	%PPB	PPB	Zhu et al., 2013
1016	tenofovir	P(O)(O)(=O)COC(Cn1c2ncnc(N)c2nc1)C	7	%PPB	PPB	Zhu et al., 2013
1017	6-aminohexanoic acid	OC(=O)CCCCCN	8	%PPB	PPB	Zhu et al., 2013
1018	biapenem	S(C=1C(C2N(C(=O)C2C(O)C)C=1C(O)=O)C)C1Cn2[n+](C1)cnc2	8	%PPB	PPB	Zhu et al., 2013
1019	tomopenem	S(C=1C(C2N(C(=O)C2C(O)C)C=1C(O)=O)C)C1CC(N(C1)C)C(=O)N1CC(NC(=O)C\N=C(\N)/N)CC1	9	%PPB	PPB	Zhu et al., 2013
1020	Pyrazinamide	O=C(N)c1nccnc1	10	%PPB	PPB	Zhu et al., 2013
1021	thiotepa	S=P(N1CC1)(N1CC1)N1CC1	10	%PPB	PPB	Zhu et al., 2013
1022	amrinone	Oc1ncc(cc1N)-c1ccncc1	11	%PPB	PPB	Zhu et al., 2013
1023	imipenem	S(CC\N=C\N)C=1CC2N(C(=O)C2C(O)C)C=1C(O)=O	14	%PPB	PPB	Zhu et al., 2013
1024	recainam	O=C(Nc1c(cccc1C)C)NCCCNC(C)C	14	%PPB	PPB	Zhu et al., 2013
1025	Frovatriptan	O=C(N)c1cc2c3CC(NC)CCc3[nH]c2cc1	15	%PPB	PPB	Zhu et al., 2013
1026	methamphetamine	N(C(Cc1ccccc1)C)C	15	%PPB	PPB	Zhu et al., 2013
1027	perindoprilat	OC(=O)C1N(C2C(C1)CCCC2)C(=O)C(NC(CCC)C(O)=O)C	15	%PPB	PPB	Zhu et al., 2013
1028	tirapazamine	O=n1c2c(n(=O)nc1N)cccc2	19	%PPB	PPB	Zhu et al., 2013
1029	nelarabine	O1C(CO)C(O)C(O)C1n1c2nc(nc(OC)c2nc1)N	20	%PPB	PPB	Zhu et al., 2013
1030	protocatechuic acid	Oc1cc(ccc1O)C(O)=O	20.7	%PPB	PPB	Zhu et al., 2013
1031	cefetamet	s1cc(nc1N)/C(=N/OC)/C(=O)NC1C2SCC(C)=C(N2C1=O)C(O)=O	22	%PPB	PPB	Zhu et al., 2013
1032	Zoledronic acid	P(O)(O)(=O)C(P(O)(O)=O)(O)Cn1ccnc1	22	%PPB	PPB	Zhu et al., 2013
1033	eptifibatide	S1SCCC(=O)NC(CCCCNC(N)=N)C(=O)NCC(=O)NC(CC(O)=O)C(=O)NC(Cc2c3c([nH]c2)cccc3)C(=O)N2C(CCC2)C(=O)NC(C1)C(=O)N	25	%PPB	PPB	Zhu et al., 2013
1034	Moxisylyte	O(C(=O)C)c1cc(C(C)C)c(OCCN(C)C)cc1C	26	%PPB	PPB	Zhu et al., 2013
1035	fleroxacin	Fc1c2N(C=C(C(O)=O)C(=O)c2cc(F)c1N1CCN(CC1)C)CCF	27	%PPB	PPB	Zhu et al., 2013
1036	carumonam	s1cc(nc1N)/C(=N/OCC(O)=O)/C(=O)NC1C(N(S(O)(=O)=O)C1=O)COC(=O)N	28	%PPB	PPB	Zhu et al., 2013
1037	5a(o-OCH3)	Fc1cc2c(N(C=C(C(O)=O)C2=O)c2ccccc2OC)cc1N1CCNCC1	29	%PPB	PPB	Zhu et al., 2013
1038	trantinterol	Clc1cc(cc(C(F)(F)F)c1N)C(NC(C)(C)C)CO	29	%PPB	PPB	Zhu et al., 2013
1039	7c(p-NO2)	Fc1cc2c(N(C=C(C(O)=O)C2=O)c2ccc([N+](=O)[O-])cc2)cc1N1CCNCC1	30	%PPB	PPB	Zhu et al., 2013
1040	mivacurium	O(C)c1c(OC)cc(cc1OC)CC1[N+](CCc2c1cc(OC)c(OC)c2)(CCCOC(=O)CC\C=C\CCC(OCCC[N+]1(CCc2c(cc(OC)c(OC)c2)C1Cc1cc(OC)c(OC)c(OC)c1)C)=O)C	30	%PPB	PPB	Zhu et al., 2013
1041	2a(o-F)	Fc1cc2c(N(C=C(C(O)=O)C2=O)c2ccccc2F)cc1N1CCNCC1	31	%PPB	PPB	Zhu et al., 2013
1042	2c(p-F)	Fc1cc2c(N(C=C(C(O)=O)C2=O)c2ccc(F)cc2)cc1N1CCNCC1	31	%PPB	PPB	Zhu et al., 2013
1043	5c(p-OCH3)	Fc1cc2c(N(C=C(C(O)=O)C2=O)c2ccc(OC)cc2)cc1N1CCNCC1	31	%PPB	PPB	Zhu et al., 2013
1044	gallic acid	Oc1c(O)cc(cc1O)C(O)=O	31.6	%PPB	PPB	Zhu et al., 2013
1045	δ-(3,4-dihydroxy-phenyl)-γ-valerolactone	O1C(CCC1=O)Cc1cc(O)c(O)cc1	34.9	%PPB	PPB	Zhu et al., 2013
1046	5b(m-OCH3)	Fc1cc2c(N(C=C(C(O)=O)C2=O)c2cc(OC)ccc2)cc1N1CCNCC1	35	%PPB	PPB	Zhu et al., 2013
1047	8b(m-OH)	Fc1cc2c(N(C=C(C(O)=O)C2=O)c2cc(O)ccc2)cc1N1CCNCC1	35	%PPB	PPB	Zhu et al., 2013
1048	8c(p-OH)	Fc1cc2c(N(C=C(C(O)=O)C2=O)c2ccc(O)cc2)cc1N1CCNCC1	35	%PPB	PPB	Zhu et al., 2013
1049	Almotriptan	S(=O)(=O)(N1CCCC1)Cc1cc2c([nH]cc2CCN(C)C)cc1	35	%PPB	PPB	Zhu et al., 2013
1050	p-hydroxybenzoic acid	Oc1ccc(cc1)C(O)=O	35.3	%PPB	PPB	Zhu et al., 2013
1051	cocaethylene	O(C(=O)c1ccccc1)C1CC2N(C(CC2)C1C(OCC)=O)C	36	%PPB	PPB	Zhu et al., 2013
1052	4a(o-CH3)	Fc1cc2c(N(C=C(C(O)=O)C2=O)c2ccccc2C)cc1N1CCNCC1	37	%PPB	PPB	Zhu et al., 2013
1053	traxoprodil	OC1(CCN(CC1)C(C(O)c1ccc(O)cc1)C)c1ccccc1	37	%PPB	PPB	Zhu et al., 2013
1054	3a(o-CF3)	Fc1cc2c(N(C=C(C(O)=O)C2=O)c2ccccc2C(F)(F)F)cc1N1CCNCC1	38	%PPB	PPB	Zhu et al., 2013
1055	ceftobiprole	s1nc(nc1N)/C(=N/O)/C(=O)NC1C2SCC(\C=C\3/CCN(C/3=O)C3CCNC3)=C(N2C1=O)C(O)=O	38	%PPB	PPB	Zhu et al., 2013
1056	sitagliptin	Fc1cc(F)c(F)cc1CC(N)CC(=O)N1CCn2c(nnc2C(F)(F)F)C1	38	%PPB	PPB	Zhu et al., 2013
1057	sulbactam	S1(=O)(=O)C2N(C(C(O)=O)C1(C)C)C(=O)C2	38	%PPB	PPB	Zhu et al., 2013
1058	doxifluridine	FC1=CN(C2OC(C)C(O)C2O)C(=O)NC1=O	39	%PPB	PPB	Zhu et al., 2013
1059	alphaxalone	OC1CC2CCC3C(C2(CC1)C)C(=O)CC1(C3CCC1C(=O)C)C	40	%PPB	PPB	Zhu et al., 2013
1060	Oxicarbazepine 10-Hidroxy	OC1Cc2c(N(c3c1cccc3)CON)cccc2	40	%PPB	PPB	Zhu et al., 2013
1061	bromopride	Brc1cc(C(=O)NCCN(CC)CC)c(OC)cc1N	40	%PPB	PPB	Zhu et al., 2013
1062	3c(p-CF3)	Fc1cc2c(N(C=C(C(O)=O)C2=O)c2ccc(cc2)C(F)(F)F)cc1N1CCNCC1	42	%PPB	PPB	Zhu et al., 2013
1063	4c(p-CH3)	Fc1cc2c(N(C=C(C(O)=O)C2=O)c2ccc(cc2)C)cc1N1CCNCC1	42	%PPB	PPB	Zhu et al., 2013
1064	Oseltamivir	O(C(CC)CC)C1C=C(CC(N)C1NC(=O)C)C(OCC)=O	42	%PPB	PPB	Zhu et al., 2013
1065	5ca (p-OCH3,N-CH3)	Fc1cc2c(N(C=C(C(O)=O)C2=O)c2ccc(OC)cc2)cc1N1CCN(CC1)C	43	%PPB	PPB	Zhu et al., 2013
1066	Pipotiazine	S1C2C(N(c3c1cccc3)CCCN1CCC(CC1)CCO)C=C(S(=O)(=O)N(C)C)C=C2	45	%PPB	PPB	Zhu et al., 2013
1067	Memantine	NC12CC3(CC(C1)(CC(C3)C2)C)C	45	%PPB	PPB	Zhu et al., 2013
1068	enprofylline	O=C1NC(=O)N(c2nc[nH]c12)CCC	45	%PPB	PPB	Zhu et al., 2013
1069	oxycodone	O1C2C34CCN(C(Cc5c3c1c(OC)cc5)C4(O)CCC2=O)C	45	%PPB	PPB	Zhu et al., 2013
1070	sparfloxacin	Fc1c(N2CC(NC(C2)C)C)c(F)c2N(C=C(C(O)=O)C(=O)c2c1N)C1CC1	45	%PPB	PPB	Zhu et al., 2013
1071	clarithromycin	O1C(CC)C(O)(C)C(O)C(C)C(=O)C(CC(OC)(C)C(OC2OC(CC(N(C)C)C2O)C)C(C)C(OC2OC(C)C(O)C(OC)(C2)C)C(C)C1=O)C	46	%PPB	PPB	Zhu et al., 2013
1072	sitafloxacin	Clc1c2N(C=C(C(O)=O)C(=O)c2cc(F)c1N1CC2(CC2)C(N)C1)C1CC1F	49	%PPB	PPB	Zhu et al., 2013
1073	acirvastine	OC(=O)\C=C(/C)\c1nc(ccc1)/C(=C\CN1CCCC1)/c1ccc(cc1)C	50	%PPB	PPB	Zhu et al., 2013
1074	cibenzoline	N1CCN=C1C1CC1(c1ccccc1)c1ccccc1	50	%PPB	PPB	Zhu et al., 2013
1075	moexiprilat	O(C)c1cc2CC(N(Cc2cc1OC)C(=O)C(NC(CCc1ccccc1)C(O)=O)C)C(O)=O	50	%PPB	PPB	Zhu et al., 2013
1076	nalbuphine	O1C2C34CCN(C(Cc5c3c1c(O)cc5)C4(O)CCC2O)CC1CCC1	50	%PPB	PPB	Zhu et al., 2013
1077	rolitetracycline	OC12C(CC3C(=C1O)C(=O)c1c(cccc1O)C3(O)C)C(N(C)C)C(=O)C(C(=O)NCN1CCCC1)=C2O	50	%PPB	PPB	Zhu et al., 2013
1078	sulbenicillin	S1C2N(C(C(O)=O)C1(C)C)C(=O)C2NC(=O)C(S(O)(=O)=O)c1ccccc1	50	%PPB	PPB	Zhu et al., 2013
1079	2b(m-F)	Fc1cc2c(N(C=C(C(O)=O)C2=O)c2cc(F)ccc2)cc1N1CCNCC1	51	%PPB	PPB	Zhu et al., 2013
1080	5cb (p-OCH3,N-C2H5)	Fc1cc2c(N(C=C(C(O)=O)C2=O)c2ccc(OC)cc2)cc1N1CCN(CC1)CC	51	%PPB	PPB	Zhu et al., 2013
1081	phenylephrine	Oc1cc(ccc1)C(O)CNC	51	%PPB	PPB	Zhu et al., 2013
1082	hydroxydihydroquinidine	O(C)c1cc2c(nccc2C(O)C2N3CC(O)(C(C2)CC3)CC)cc1	53	%PPB	PPB	Zhu et al., 2013
1083	5ba(m-OCH3,N-CH3)	Fc1cc2c(N(C=C(C(O)=O)C2=O)c2cc(OC)ccc2)cc1N1CCN(CC1)C	54	%PPB	PPB	Zhu et al., 2013
1084	5cc (p-OCH3, N- C3H7	Fc1cc2c(N(C=C(C(O)=O)C2=O)c2ccc(OC)cc2)cc1N1CCN(CC1)CCC	54	%PPB	PPB	Zhu et al., 2013
1085	Aspirin	O(C(=O)C)c1ccccc1C(O)=O	55	%PPB	PPB	Zhu et al., 2013
1086	Enalaprilat	OC(=O)C1N(CCC1)C(=O)C(NC(CCc1ccccc1)C(O)=O)C	55	%PPB	PPB	Zhu et al., 2013
1087	Thalidomide	O=C1NC(=O)CCC1N1C(=O)c2c(cccc2)C1=O	55	%PPB	PPB	Zhu et al., 2013
1088	tetramethylpyrazine phosphate	n1c(C)c(nc(C)c1C)C	56.2	%PPB	PPB	Zhu et al., 2013
1089	vanillic acid	O(C)c1cc(ccc1O)C(O)=O	56.3	%PPB	PPB	Zhu et al., 2013
1090	voriconazole	Fc1cc(F)ccc1C(O)(C(C)c1ncncc1F)Cn1ncnc1	58	%PPB	PPB	Zhu et al., 2013
1091	telithromycin	O1C(CC)C2(OC(=O)N(C2C(C)C(=O)C(CC(OC)(C)C(OC2OC(CC(N(C)C)C2O)C)C(C)C(=O)C(C)C1=O)C)CCCCn1cc(nc1)-c1cccnc1)C	59	%PPB	PPB	Zhu et al., 2013
1092	Testosterone	OC1CCC2C3C(CCC12C)C1(C(=CC(=O)CC1)CC3)C	60	%PPB	PPB	Zhu et al., 2013
1093	3-Hydroxy Quinidine	O(C)c1cc2c(nccc2C(O)C2N3CC(O)(C(C2)CC3)C=C)cc1	60	%PPB	PPB	Zhu et al., 2013
1094	buflomedil	O(C)c1cc(OC)cc(OC)c1C(=O)CCCN1CCCC1	60	%PPB	PPB	Zhu et al., 2013
1095	iloprost	OC1CC2C(C\C(\C2)=C\CCCC(OCC(=O)c2ccccc2)=O)C1\C=C\C(O)C(CC#CC)C	60	%PPB	PPB	Zhu et al., 2013
1096	vincristine	O(C(=O)C)C1C2(C3N(CCC34C(N(c3cc(OC)c(cc34)C3(CC4CC(O)(CN(C4)CCc4c3[nH]c3c4cccc3)CC)C(OC)=O)C=O)C1(O)C(OC)=O)CC=C2)CC	60	%PPB	PPB	Zhu et al., 2013
1097	talinolol	O(CC(O)CNC(C)(C)C)c1ccc(NC(=O)NC2CCCCC2)cc1	61	%PPB	PPB	Zhu et al., 2013
1098	JMC_05	S(Oc1ccc(cc1)C(C(=O)NCCCN1CCCC1)C)(=O)(=O)C(F)(F)F	62	%PPB	PPB	Zhu et al., 2013
1099	3b(m-CF3)	Fc1cc2c(N(C=C(C(O)=O)C2=O)c2cc(ccc2)C(F)(F)F)cc1N1CCNCC1	62	%PPB	PPB	Zhu et al., 2013
1100	10-hydroxycarbazepine	OC1Cc2c(N(c3c1cccc3)C(=O)N)cccc2	62.5	%PPB	PPB	Zhu et al., 2013
1101	Gemifloxacin	Fc1cc2c(nc1N1CC(CN)/C(=N/OC)/C1)N(C=C(C(O)=O)C2=O)C1CC1	64	%PPB	PPB	Zhu et al., 2013
1102	2-hydroxyimipramine	Oc1cc2CCc3c(N(c2cc1)CCCN(C)C)cccc3	64	%PPB	PPB	Zhu et al., 2013
1103	sch34343	S1C2N(C(=O)C2C(O)C)C(C(O)=O)=C1SCCOC(=O)N	65	%PPB	PPB	Zhu et al., 2013
1104	p-coumaric acid	Oc1ccc(cc1)\C=C\C(O)=O	65.4	%PPB	PPB	Zhu et al., 2013
1105	7b(m-NO2)	Fc1cc2c(N(C=C(C(O)=O)C2=O)c2cc([N+](=O)[O-])ccc2)cc1N1CCNCC1	66	%PPB	PPB	Zhu et al., 2013
1106	caffeic acid	Oc1cc(ccc1O)\C=C\C(O)=O	66	%PPB	PPB	Zhu et al., 2013
1107	baicalin	O1C(C(O)=O)C(O)C(O)C(O)C1Oc1cc2OC(=CC(=O)c2c(O)c1O)c1ccccc1	66.4	%PPB	PPB	Zhu et al., 2013
1108	nitidine chloride	O1c2c(OC1)cc1c(c3[n+](cc4cc(OC)c(OC)cc4c3cc1)C)c2	67.4	%PPB	PPB	Zhu et al., 2013
1109	quinaprilat	OC(=O)C1N(Cc2c(C1)cccc2)C(=O)C(NC(CCc1ccccc1)C(O)=O)C	68	%PPB	PPB	Zhu et al., 2013
1110	adinazolam	Clc1cc2c(-n3c(nnc3CN(C)C)CN=C2c2ccccc2)cc1	69	%PPB	PPB	Zhu et al., 2013
1111	JMC_04	S(Oc1ccc(cc1)C(C(=O)NCCN1CCCC1)C)(=O)(=O)C(F)(F)F	70	%PPB	PPB	Zhu et al., 2013
1112	albendazole	S(CCC)c1cc2nc([nH]c2cc1)NC(OC)=O	70	%PPB	PPB	Zhu et al., 2013
1113	JMC_10	S(=O)(=O)(NC(=O)C(C)c1ccc(cc1)CC(C(O)=O)C)C	70.2	%PPB	PPB	Zhu et al., 2013
1114	vorinostat	O=C(Nc1ccccc1)CCCCCCC(=O)NO	71	%PPB	PPB	Zhu et al., 2013
1115	bencycloquidium bromide	O(CC(O)(C1CCCC1)c1ccccc1)C1C2CC[N+](C1)(CC2)C	71.4	%PPB	PPB	Zhu et al., 2013
1116	guanfacine	Clc1cccc(Cl)c1CC(=O)NC(N)=N	72	%PPB	PPB	Zhu et al., 2013
1117	procyanidin B1	O1c2c(CC(O)C1c1cc(O)c(O)cc1)c(O)cc(O)c2C1c2c(OC(C1O)c1cc(O)c(O)cc1)cc(O)cc2O	73.5	%PPB	PPB	Zhu et al., 2013
1118	ferulic acid	O(C)c1cc(ccc1O)\C=C\C(O)=O	73.5	%PPB	PPB	Zhu et al., 2013
1119	Cetiedil	s1cc(cc1)C(C(OCCN1CCCCCC1)=O)C1CCCCC1	74	%PPB	PPB	Zhu et al., 2013
1120	artesunate	O1C2OC3(OOC24C(CCC(C4CC3)C)C(C)C1OC(=O)CCC(O)=O)C	75	%PPB	PPB	Zhu et al., 2013
1121	dapsone	S(=O)(=O)(c1ccc(N)cc1)c1ccc(N)cc1	75	%PPB	PPB	Zhu et al., 2013
1122	Vecuronium bromide	O(C(=O)C)C1C2(C(CC1[N+]1(CCCCC1)C)C1C(CC2)C2(CC(N3CCCCC3)C(OC(=O)C)CC2CC1)C)C	75	%PPB	PPB	Zhu et al., 2013
1123	JMC_07	O=C(NCCCN(C)C)C(C)c1ccc(cc1)CC(C)C	75.1	%PPB	PPB	Zhu et al., 2013
1124	salvianolic acid B	O1c2c(C(C(OC(Cc3cc(O)c(O)cc3)C(O)=O)=O)C1c1cc(O)c(O)cc1)c(ccc2O)\C=C\C(OC(Cc1cc(O)c(O)cc1)C(O)=O)=O	75.2	%PPB	PPB	Zhu et al., 2013
1125	9-Hydroxyrisperidone	Fc1cc2onc(c2cc1)C1CCN(CC1)CCC=1C(=O)N2C(=NC=1C)C(O)CCC2	77	%PPB	PPB	Zhu et al., 2013
1126	Combretastatin A4 phosphate	P(Oc1cc(ccc1OC)\C=C\c1cc(OC)c(OC)c(OC)c1)(O)(O)=O	77	%PPB	PPB	Zhu et al., 2013
1127	dihydroquinidine	O(C)c1cc2c(nccc2C(O)C2N3CC(C(C2)CC3)CC)cc1	78	%PPB	PPB	Zhu et al., 2013
1128	Pregnenolone	OC1CC2=CCC3C4CCC(C(=O)C)C4(CCC3C2(CC1)C)C	80	%PPB	PPB	Zhu et al., 2013
1129	Tryptophan	OC(=O)C(N)Cc1c2c([nH]c1)cccc2	80	%PPB	PPB	Zhu et al., 2013
1130	hydrocortisone	OC1(CCC2C3C(C4(C(=CC(=O)CC4)CC3)C)C(O)CC12C)C(=O)CO	80	%PPB	PPB	Zhu et al., 2013
1131	laam	O(C(C(CC(N(C)C)C)(c1ccccc1)c1ccccc1)CC)C(=O)C	80	%PPB	PPB	Zhu et al., 2013
1132	penicillamine	SC(C(N)C(O)=O)(C)C	80	%PPB	PPB	Zhu et al., 2013
1133	tigecycline	OC12C(CC3C(C1=O)=C(O)c1c(C3)c(N(C)C)cc(NC(=O)CNC(C)(C)C)c1O)C(N(C)C)C(=O)C(C(=O)N)=C2O	80	%PPB	PPB	Zhu et al., 2013
1134	Triamcinolone acetonide	FC12C(C3CC4OC(OC4(C(=O)CO)C3(CC1O)C)(C)C)CCC1=CC(=O)C=CC12C	80	%PPB	PPB	Zhu et al., 2013
1135	bufuralol	o1c2c(cc1C(O)CNC(C)(C)C)cccc2CC	81	%PPB	PPB	Zhu et al., 2013
1136	scutellarin	O1C(C(O)=O)C(O)C(O)C(O)C1Oc1cc2OC(=CC(=O)c2c(O)c1O)c1ccc(O)cc1	82	%PPB	PPB	Zhu et al., 2013
1137	betamipron	OC(=O)CCNC(=O)c1ccccc1	83	%PPB	PPB	Zhu et al., 2013
1138	bortezomib	CC(C)CC(NC(=O)C(CC1=CC=CC=C1)NC(=O)C1=NC=CN=C1)B(O)O	83	%PPB	PPB	Zhu et al., 2013
1139	n-acetylcysteine	SCC(NC(=O)C)C(O)=O	83	%PPB	PPB	Zhu et al., 2013
1140	JMC_08	O(CCNC(=O)C(C)c1ccc(cc1)CC(C)C)CCO	83.1	%PPB	PPB	Zhu et al., 2013
1141	methyl protodioscin	O1C(CO)C(OC2OC(C)C(O)C(O)C2O)C(O)C(OC2OC(C)C(O)C(O)C2O)C1OC1CC2=CCC3C4CC5OC(OC)(CCC(COC6OC(CO)C(O)C(O)C6O)C)C(C5C4(CCC3C2(CC1)C)C)C	84.5	%PPB	PPB	Zhu et al., 2013
1142	Desloratadine	Clc1cc2c(cc1)\C(\c1ncccc1CC2)=C\1/CCNCC/1	84.5	%PPB	PPB	Zhu et al., 2013
1143	eletriptan	S(=O)(=O)(CCc1cc2c([nH]cc2CC2N(CCC2)C)cc1)c1ccccc1	85	%PPB	PPB	Zhu et al., 2013
1144	Ibandronic acid	P(O)(O)(=O)C(P(O)(O)=O)(O)CCN(CCCCC)C	85	%PPB	PPB	Zhu et al., 2013
1145	sisomicin	O1C(OC2C(O)C(OC3OCC(O)(C)C(NC)C3O)C(N)CC2N)C(N)CC=C1CN	85	%PPB	PPB	Zhu et al., 2013
1146	JMC_06	O=C(NCCCN1CCCC1)C(C)c1ccc(cc1)CC(C)C	85.1	%PPB	PPB	Zhu et al., 2013
1147	clonazepam	Clc1ccccc1C1=NCC(=O)Nc2c1cc([N+](=O)[O-])cc2	85.5	%PPB	PPB	Zhu et al., 2013
1148	cetrorelix	Clc1ccc(cc1)CC(NC(=O)C(NC(=O)C)Cc1cc2c(cc1)cccc2)C(=O)NC(Cc1cccnc1)C(=O)NC(C(=O)NC(Cc1ccc(O)cc1)C(=O)NC(CCCNC(=O)N)C(=O)NC(CC(C)C)C(=O)NC(CCC\N=C(\N)/N)C(=O)N1CCCC1C(=O)NC(C(=O)N)C)CO	86	%PPB	PPB	Zhu et al., 2013
1149	quinacrine	Clc1cc2nc3c(cc(OC)cc3)c(NC(CCCN(CC)CC)C)c2cc1	87	%PPB	PPB	Zhu et al., 2013
1150	drotaverine	O(CC)c1cc(ccc1OCC)\C=C\1/NCCc2cc(OCC)c(OCC)cc/12	88	%PPB	PPB	Zhu et al., 2013
1151	rosuvastatin	S(=O)(=O)(N(C)c1nc(-c2ccc(F)cc2)c(\C=C\C(O)CC(O)CC(O)=O)c(n1)C(C)C)C	88	%PPB	PPB	Zhu et al., 2013
1152	Triazolam	Clc1ccccc1C1=NCc2n(-c3c1cc(Cl)cc3)c(nn2)C	89	%PPB	PPB	Zhu et al., 2013
1153	promazine	S1c2c(N(c3c1cccc3)CCCN(C)C)cccc2	89	%PPB	PPB	Zhu et al., 2013
1154	Teicoplanin a2-1	Clc1c2Oc3cc4C(NC(=O)C5NC(=O)C(NC(=O)C(N)c6cc(Oc7cc(O)cc5c7)c(O)cc6)Cc5cc(Cl)c(Oc(c4)c3OC3OC(CO)C(O)C(O)C3NC(=O)CCCCCCCCC)cc5)C(=O)NC3c4cc(-c5c(cc(O)cc5OC5OC(CO)C(O)C(O)C5O)C(NC(=O)C(NC3=O)C(OC3OC(CO)C(O)C(O)C3NC(=O)C)c(c1)cc2)C(O)=O)c(O)cc4	89	%PPB	PPB	Zhu et al., 2013
1155	Novobiocin	O1C(C)(C)C(OC)C(OC(=O)N)C(O)C1Oc1ccc2c(OC(=O)C(NC(=O)c3cc(C\C=C(\C)/C)c(O)cc3)=C2O)c1C	90	%PPB	PPB	Zhu et al., 2013
1156	Duloxetine	s1cccc1C(Oc1c2c(ccc1)cccc2)CCNC	90	%PPB	PPB	Zhu et al., 2013
1157	Ezetimibe	Fc1ccc(cc1)C(O)CCC1C(N(C1=O)c1ccc(F)cc1)c1ccc(O)cc1	90	%PPB	PPB	Zhu et al., 2013
1158	Epalrestat	S1/C(=C\C(=C\c2ccccc2)\C)/C(=O)N(CC(O)=O)C1=S	90.1	%PPB	PPB	Zhu et al., 2013
1159	arbidol	Brc1cc2n(C)c(CSc3ccccc3)c(c2c(CN(C)C)c1O)C(OCC)=O	91.1	%PPB	PPB	Zhu et al., 2013
1160	gefitinib	Clc1cc(Nc2ncnc3c2cc(OCCCN2CCOCC2)c(OC)c3)ccc1F	91.1	%PPB	PPB	Zhu et al., 2013
1161	leucovorin	Oc1nc(nc2NCC(N(c12)C=O)CNc1ccc(cc1)C(=O)NC(CCC(O)=O)C(O)=O)N	91.3	%PPB	PPB	Zhu et al., 2013
1162	Epigallocatechin gallate	O1c2c(CC(OC(=O)c3cc(O)c(O)c(O)c3)C1c1cc(O)c(O)c(O)c1)c(O)cc(O)c2	91.4	%PPB	PPB	Zhu et al., 2013
1163	daptomycin	O1C(C)C(NC(=O)C(NC(=O)C(NC(=O)C(NC(=O)CCCCCCCCC)Cc2c3c([nH]c2)cccc3)CC(=O)N)CC(O)=O)C(=O)NCC(=O)NC(CCCN)C(=O)NC(CC(O)=O)C(=O)NC(C)C(=O)NC(CC(O)=O)C(=O)NCC(=O)NC(CO)C(=O)NC(C(CC(O)=O)C)C(=O)NC(CC(=O)c2ccccc2N)C1=O	91.7	%PPB	PPB	Zhu et al., 2013
1164	etoricoxib	Clc1cc(c(nc1)-c1ccc(nc1)C)-c1ccc(S(=O)(=O)C)cc1	91.9	%PPB	PPB	Zhu et al., 2013
1165	JMC_03	S(Oc1ccc(cc1)C(C(=O)N)C)(=O)(=O)C(F)(F)F	92	%PPB	PPB	Zhu et al., 2013
1166	Tinoridine	s1c2c(CCN(C2)Cc2ccccc2)c(C(OCC)=O)c1N	92	%PPB	PPB	Zhu et al., 2013
1167	Digitoxigenin	O1CC(=CC1=O)C1CCC2(O)C3C(CCC12C)C1(C(CC(O)CC1)CC3)C	92.7	%PPB	PPB	Zhu et al., 2013
1168	hydroxyflutamide	FC(F)(F)c1cc(NC(=O)C(O)(C)C)ccc1[N+](=O)[O-]	93	%PPB	PPB	Zhu et al., 2013
1169	estazolam	Clc1cc2c(-n3c(nnc3)CN=C2c2ccccc2)cc1	93	%PPB	PPB	Zhu et al., 2013
1170	iclaprim	O1c2c(C=CC1C1CC1)c(cc(OC)c2OC)Cc1cnc(nc1N)N	93	%PPB	PPB	Zhu et al., 2013
1171	telavancin	Clc1c2Oc3cc4C(NC(=O)C(NC(=O)C(NC(=O)C(NC)CC(C)C)C(O)c(c1)cc2)CC(=O)N)C(=O)NC1c2cc(-c5c(cc(O)c(CNCP(O)(O)=O)c5O)C(NC(=O)C(NC1=O)C(O)c1cc(Cl)c(Oc(c4)c3OC3OC(CO)C(O)C(O)C3OC3OC(C)C(O)C(NCCNCCCCCCCCCC)(C3)C)cc1)C(O)=O)c(O)cc2	93	%PPB	PPB	Zhu et al., 2013
1172	Rifapentine	O1c2c3c4c(c(O)c2C)c(O)c(NC(=O)/C(=C\C=C\C(C)C(O)C(C)C(O)C(C)C(OC(=O)C)C(C)C(OC)\C=C\OC1(C)C3=O)/C)c(\C=N\N1CCN(CC1)C1CCCC1)c4O	93.2	%PPB	PPB	Zhu et al., 2013
1173	piritramide	O=C(N)C1(N2CCCCC2)CCN(CC1)CCC(C#N)(c1ccccc1)c1ccccc1	93.9	%PPB	PPB	Zhu et al., 2013
1174	Idarubicinol	O1C(C)C(O)C(N)CC1OC1CC(O)(Cc2c1c(O)c1c(C(=O)c3c(cccc3)C1=O)c2O)C(O)C	94	%PPB	PPB	Zhu et al., 2013
1175	tadalafil	O1c2cc(ccc2OC1)C1N2C(Cc3c1[nH]c1c3cccc1)C(=O)N(CC2=O)C	94	%PPB	PPB	Zhu et al., 2013
1176	apomorphine	Oc1c-2c(CC3N(CCc4c3c-2ccc4)C)ccc1O	94	%PPB	PPB	Zhu et al., 2013
1177	azimilide	Clc1ccc(cc1)-c1oc(cc1)\C=N\N1CC(=O)N(CCCCN2CCN(CC2)C)C1=O	94	%PPB	PPB	Zhu et al., 2013
1178	dexmedetomidine	[nH]1cc(nc1)C(C)c1cccc(C)c1C	94	%PPB	PPB	Zhu et al., 2013
1179	Sulindac sulfide	S(C)c1ccc(cc1)\C=C/1\c2c(cc(F)cc2)C(CC(O)=O)=C\1C	94	%PPB	PPB	Zhu et al., 2013
1180	Trabectedin (ET-743, Yondelis)	S1CC2(NCCc3c2cc(OC)c(O)c3)C(OCC2N3C(C4N(C(Cc5c4c(O)c(OC)c(c5)C)C3O)C)C1c1c2c2OCOc2c(C)c1OC(=O)C)=O	94.2	%PPB	PPB	Zhu et al., 2013
1181	cimoxatone	O1C(CN(c2ccc(OCc3cc(ccc3)C#N)cc2)C1=O)COC	94.5	%PPB	PPB	Zhu et al., 2013
1182	delorazepam	Clc1ccccc1C1=NCC(=O)Nc2c1cc(Cl)cc2	94.9	%PPB	PPB	Zhu et al., 2013
1183	vardenafil	S(=O)(=O)(N1CCN(CC1)CC)c1cc(C=2N=C(O)c3n(N=2)c(nc3C)CCC)c(OCC)cc1	95	%PPB	PPB	Zhu et al., 2013
1184	Cinacalcet hydrochloride	FC(F)(F)c1cc(ccc1)CCCNC(C)c1c2c(ccc1)cccc2	95	%PPB	PPB	Zhu et al., 2013
1185	Indocyanine green	S(O)(=O)(=O)CCCCN\1c2c(c3c(cc2)cccc3)C(C)(C)/C/1=C/C=C/C=C/C=C\C1=[N+](c2c(c3c(cc2)cccc3)C1(C)C)CCCCS(O)(=O)=O	95	%PPB	PPB	Zhu et al., 2013
1186	Benazeprilat	O=C1N(c2c(CCC1NC(CCc1ccccc1)C(O)=O)cccc2)CC(O)=O	95.3	%PPB	PPB	Zhu et al., 2013
1187	fosfluconazole	P(OC(Cn1ncnc1)(Cn1ncnc1)c1ccc(F)cc1F)(O)(O)=O	95.8	%PPB	PPB	Zhu et al., 2013
1188	Binedaline	N(CCN(N1C=C(C2C1C=CC=C2)c1ccccc1)C)(C)C	96	%PPB	PPB	Zhu et al., 2013
1189	JMC_09	OC(=O)C(NC(=O)C(C)c1ccc(cc1)CC(C)C)C	96	%PPB	PPB	Zhu et al., 2013
1190	caspofungin	OC1CC(NC(=O)CCCCCCCCC(CC(CC)C)C)C(=O)NC(C(O)C)C(=O)N2C(CC(O)C2)C(=O)NC(C(O)C(O)c2ccc(O)cc2)C(=O)NC(C(O)CCN)C(=O)N2C(C(O)CC2)C(=O)NC1NCCN	96.5	%PPB	PPB	Zhu et al., 2013
1191	isoxicam	S1(=O)(=O)N(C)C(C(=O)Nc2noc(c2)C)=C(O)c2c1cccc2	96.5	%PPB	PPB	Zhu et al., 2013
1192	dronabinol	O1c2c(C3C(CCC(=C3)C)C1(C)C)c(O)cc(c2)CCCCC	97	%PPB	PPB	Zhu et al., 2013
1193	drospirenone	O1C2(C3C(C4C5C(CCC24C)C2(C(=CC(=O)CC2)C2C5C2)C)C3)CCC1=O	97	%PPB	PPB	Zhu et al., 2013
1194	epristeride	OC(=O)C=1CCC2(C3C(C4CCC(C(=O)NC(C)(C)C)C4(CC3)C)CC=C2C=1)C	97	%PPB	PPB	Zhu et al., 2013
1195	Mycophenolate mofetil	O1Cc2c(c(O)c(C\C=C(\CCC(OCCN3CCOCC3)=O)/C)c(OC)c2C)C1=O	97	%PPB	PPB	Zhu et al., 2013
1196	norelgestromin	OC1(CCC2C3C(C4C(=C/C(=N/O)/CC4)CC3)CCC12CC)C#C	97	%PPB	PPB	Zhu et al., 2013
1197	Nimesulide	S(=O)(=O)(Nc1ccc([N+](=O)[O-])cc1Oc1ccccc1)C	97.5	%PPB	PPB	Zhu et al., 2013
1198	dexloxiglumide	Clc1cc(ccc1Cl)C(=O)NC(CCC(O)=O)C(=O)N(CCCCC)CCCOC	97.6	%PPB	PPB	Zhu et al., 2013
1199	pimobendan	O(C)c1ccc(cc1)-c1[nH]c2c(n1)cc(cc2)C1=NNC(=O)CC1C	97.6	%PPB	PPB	Zhu et al., 2013
1200	25-desacetylrifapentine	O1c2c3c4c(c(O)c2C)c(O)c(NC(=O)/C(=C\C=C\C(C)C(O)C(C)C(O)C(C)C(O)C(C)C(OC)\C=C\OC1(C)C3=O)/C)c(\C=N\N1CCN(CC1)C1CCCC1)c4O	97.7	%PPB	PPB	Zhu et al., 2013
1201	valspodar	O=C1N(C)C(C(=O)C(C\C=C\C)C)C(=O)NC(C(C)C)C(=O)N(CC(=O)N(C)C(CC(C)C)C(=O)NC(C(C)C)C(=O)N(C)C(CC(C)C)C(=O)NC(C)C(=O)NC(C)C(=O)N(C)C(CC(C)C)C(=O)N(C)C(CC(C)C)C(=O)N(C)C1C(C)C)C	97.8	%PPB	PPB	Zhu et al., 2013
1202	clofibric acid	Clc1ccc(OC(C(O)=O)(C)C)cc1	98	%PPB	PPB	Zhu et al., 2013
1203	dalbavancin	Clc1c2C3NC(=O)C(NC(=O)C(NC)c4cc(Oc(cc1O)c2)c(O)cc4)Cc1ccc(Oc2cc4C(NC3=O)C(=O)NC3c5cc(-c6c(cc(O)cc6OC6OC(CO)C(O)C(O)C6O)C(NC(=O)C(NC3=O)C(O)c3cc(Cl)c(Oc(c4)c2OC2OC(C(O)=O)C(O)C(O)C2NC(=O)CCCCCCCCC(C)C)cc3)C(=O)NCCCN(C)C)c(O)cc5)cc1	98	%PPB	PPB	Zhu et al., 2013
1204	darifenacin	O1CCc2cc(ccc12)CCN1CC(CC1)C(C(=O)N)(c1ccccc1)c1ccccc1	98	%PPB	PPB	Zhu et al., 2013
1205	solifenacin	O=CC([Se]C1=CC=CC=C1)C(CC1=CC=CC=C1)NC(=O)OCC1C2=CC=CC=C2C2=CC=CC=C12	98	%PPB	PPB	Zhu et al., 2013
1206	Camptothecin	O1CC2=C(C=C3N(Cc4c3nc3c(c4)cccc3)C2=O)C(O)(CC)C1=O	98.3	%PPB	PPB	Zhu et al., 2013
1207	diprafenone	O(CC(O)CNC(CC)(C)C)c1ccccc1C(=O)CCc1ccccc1	98.3	%PPB	PPB	Zhu et al., 2013
1208	Itanoxone	Clc1ccccc1-c1ccc(cc1)C(=O)CC(C(O)=O)=C	98.5	%PPB	PPB	Zhu et al., 2013
1209	Nk 611	O1C2C(OC(OC2)C)C(O)C(N(C)C)C1OC1C2C(C(c3c1cc1OCOc1c3)c1cc(OC)c(O)c(OC)c1)C(OC2)=O	98.7	%PPB	PPB	Zhu et al., 2013
1210	ethinylestradiol-3-sulfate	S(Oc1cc2CCC3C4CCC(O)(C#C)C4(CCC3c2cc1)C)(O)(=O)=O	98.9	%PPB	PPB	Zhu et al., 2013
1211	3-Carboxy-4-methyl-5-propyl-2- furan-propionic acid	o1c(CCC(O)=O)c(C(O)=O)c(C)c1CCC	99	%PPB	PPB	Zhu et al., 2013
1212	Carprofen	Clc1cc2c3c([nH]c2cc1)cc(cc3)C(C(O)=O)C	99	%PPB	PPB	Zhu et al., 2013
1213	Clometacin	Clc1ccc(cc1)C(=O)c1c2c(n(CC(O)=O)c1C)cc(OC)cc2	99	%PPB	PPB	Zhu et al., 2013
1214	Aripiprazole	Clc1c(N2CCN(CC2)CCCCOc2cc3NC(=O)CCc3cc2)cccc1Cl	99	%PPB	PPB	Zhu et al., 2013
1215	Bexarotene	OC(=O)c1ccc(cc1)C(=C)c1cc2c(cc1C)C(CCC2(C)C)(C)C	99	%PPB	PPB	Zhu et al., 2013
1216	Olmesartan	OC(C)(C)c1nc(n(Cc2ccc(cc2)-c2ccccc2-c2nn[nH]n2)c1C(O)=O)CCC	99	%PPB	PPB	Zhu et al., 2013
1217	Candesartan cilexetil	O(C(OC(OC(=O)c1c2n(Cc3ccc(cc3)-c3ccccc3-c3nn[nH]n3)c(OCC)nc2ccc1)C)=O)C1CCCCC1	99	%PPB	PPB	Zhu et al., 2013
1218	conivaptan	O=C(N1CCc2nc([nH]c2-c2c1cccc2)C)c1ccc(NC(=O)c2ccccc2-c2ccccc2)cc1	99	%PPB	PPB	Zhu et al., 2013
1219	eltanolone	OC1CC2CCC3C4CCC(C(=O)C)C4(CCC3C2(CC1)C)C	99	%PPB	PPB	Zhu et al., 2013
1220	nitazoxanide	s1c([N+](=O)[O-])cnc1NC(=O)c1ccccc1O	99	%PPB	PPB	Zhu et al., 2013
1221	quercetin	O1c2c(C(=O)C(O)=C1c1cc(O)c(O)cc1)c(O)cc(O)c2	99.1	%PPB	PPB	Zhu et al., 2013
1222	tezosentan	S(=O)(=O)(Nc1nc(nc(OCCO)c1Oc1ccccc1OC)-c1cc(ncc1)-c1nn[nH]n1)c1ncc(cc1)C(C)C	99.15	%PPB	PPB	Zhu et al., 2013
1223	cilomilast	O(c1cc(ccc1OC)C1(CCC(CC1)C(O)=O)C#N)C1CCCC1	99.4	%PPB	PPB	Zhu et al., 2013
1224	Fentiazac	Clc1ccc(cc1)-c1nc(sc1CC(O)=O)-c1ccccc1	99.5	%PPB	PPB	Zhu et al., 2013
1225	Fluindione	Fc1ccc(cc1)C1C(=O)c2c(cccc2)C1=O	99.5	%PPB	PPB	Zhu et al., 2013
1226	Halofenate	Clc1ccc(cc1)C(Oc1cc(ccc1)C(F)(F)F)C(OCCNC(=O)C)=O	99.5	%PPB	PPB	Zhu et al., 2013
1227	JMC_01	S(=O)(=O)(NC(=O)C(C)c1ccc(OS(=O)(=O)C(F)(F)F)cc1)C	99.5	%PPB	PPB	Zhu et al., 2013
1228	Pirprofen	Clc1cc(ccc1N1CC=CC1)C(C(O)=O)C	99.5	%PPB	PPB	Zhu et al., 2013
1229	Bepridil	O(CC(C)C)CC(N1CCCC1)CN(Cc1ccccc1)c1ccccc1	99.5	%PPB	PPB	Zhu et al., 2013
1230	Bilirubin	O=C1N\C(=C/c2[nH]c(Cc3[nH]c(\C=C\4/NC(=O)C(C)=C/4C=C)c(C)c3CCC(O)=O)c(CCC(O)=O)c2C)\C(C)=C1C=C	99.5	%PPB	PPB	Zhu et al., 2013
1231	flavonoids catechin	O1c2c(CC(O)C1c1cc(O)c(O)cc1)c(O)cc(O)c2	99.5	%PPB	PPB	Zhu et al., 2013
1232	taxifolin	O1c2c(C(=O)C(O)C1c1cc(O)c(O)cc1)c(O)cc(O)c2	99.5	%PPB	PPB	Zhu et al., 2013
1233	7-hydroxystaurosporine	O1C2n3c4c(c5c(c6c7c(n(c46)C1(C)C(OC)C(NC)C2)cccc7)C(O)NC5=O)c1c3cccc1	99.5	%PPB	PPB	Zhu et al., 2013
1234	9-aminocamptothecin	O1CC2=C(C=C3N(Cc4c3nc3c(c4)c(N)ccc3)C2=O)C(O)(CC)C1=O	99.5	%PPB	PPB	Zhu et al., 2013
1235	amsalog	S(=O)(=O)(Nc1cc(OC)c(Nc2c3c(nc4c2cccc4C)c(ccc3)C(=O)NC)cc1)C	99.5	%PPB	PPB	Zhu et al., 2013
1236	bromfenac	Brc1ccc(cc1)C(=O)c1cccc(CC(O)=O)c1N	99.5	%PPB	PPB	Zhu et al., 2013
1237	clevidipine	Clc1c(cccc1Cl)C1\C(=C(/OCOC(=O)CCC)\O)\C(=NC(C)=C1C(OC)=O)C	99.5	%PPB	PPB	Zhu et al., 2013
1238	dha-paclitaxel	O1C2CC(O)C3(C(C(OC(=O)c4ccccc4)C4(O)CC(OC(=O)C(OC(=O)CC\C=C\C\C=C\C\C=C\C\C=C\C\C=C\C\C=C\CC)C(NC(=O)c5ccccc5)c5ccccc5)C(=C(C4(C)C)C(OC(=O)C)C3=O)C)C2(OC(=O)C)C1)C	99.5	%PPB	PPB	Zhu et al., 2013
1239	maxipost	Clc1cc(C2(F)c3c(NC2=O)cc(cc3)C(F)(F)F)c(OC)cc1	99.5	%PPB	PPB	Zhu et al., 2013
1240	micafungin	S(Oc1cc(ccc1O)C(O)C(O)C1NC(=O)C2N(CC(O)C2)C(=O)C(O)(NC(=O)C(NC(=O)c2ccc(cc2)-c2noc(c2)-c2ccc(OCCCCC)cc2)CC(O)C(O)NC(=O)C2N(CC(C)C2O)C(=O)C(NC1=O)C(O)CC(=O)N)C)(O)(=O)=O	99.5	%PPB	PPB	Zhu et al., 2013
1241	paricalcitol	OC1CC(O)C/C(/C1)=C\C=C/1\C2CCC(C(\C=C\C(C(O)(C)C)C)C)C2(CCC\1)C	99.5	%PPB	PPB	Zhu et al., 2013
1242	verlukast	Clc1cc2nc(ccc2cc1)\C=C\c1cc(ccc1)C(SCCC(=O)N(C)C)SCCC(O)=O	99.5	%PPB	PPB	Zhu et al., 2013
1243	11	N()C1=NN()C(=N1)C1=C()C(=NC()=C1)N(C()())C()()	-1.17	logBB	BBB	Zhang et al., 2008
1244	12	N(\C(=N\C#N)N()C()()C()()SC()()C1=NC()=C()C()=C1Br)C()()C()()	-2.15	logBB	BBB	Zhang et al., 2008
1245	19	N()C(=NC1=NC(=C()S1)C1=C()C()=C()C(N()C(=N\C#N)\N()C()())=C1)N()	-1.54	logBB	BBB	Zhang et al., 2008
1246	Terbutylchlorambucil	C1=C()C(=C()C()=C1N(C()()C()()Cl)C()()C()()Cl)C()()C()()C()()C(=O)OC(C()())(C()())C()()	1	logBB	BBB	Zhang et al., 2008
1247	Org12692	N1C()()C()()N(C2=C()C()=C(C(Cl)=N2)C(F)(F)F)C()()C1()	1.64	logBB	BBB	Zhang et al., 2008
1248	Org13011	C1=C()C(=C()C(=N1)N1C()()C()()N(C()()C()()C()()C()()N2C(=O)C()()C()()C2())C()()C1())C(F)(F)F	0.16	logBB	BBB	Zhang et al., 2008
1249	Org34167	N()C()(C1=C(C()=C()C()=C1)C1=NOC2=C()C()=C()C()=C12)C()()C()=C()	0	logBB	BBB	Zhang et al., 2008
1250	M2L-663581	OC()()C(O)(C1=NC(=NO1)C1=C2N(C()=N1)C1=C()C()=C()C(Cl)=C1C(=O)N(C()())C2())C()()	-1.82	logBB	BBB	Zhang et al., 2008
1251	RO19-4603	C1=C()C2=C(S1)C(=O)N(C()())C()()C1=C(N=C()N21)C(=O)OC(C()())(C()())C()()	-0.25	logBB	BBB	Zhang et al., 2008
1252	15	N(C1=NC()()C(=C1[N+]()([O-])[O-])C()()C1=C()C()=C()C()=C1)C()()C()()SC()()C1=C()C()=C()C()=N1	-0.12	logBB	BBB	Zhang et al., 2008
1253	16	N()C(=NC1=NC(=C()S1)C1=C()C()=C()C()=C1)N()	-0.18	logBB	BBB	Zhang et al., 2008
1254	17	N()C(=NC1=NC(=C()S1)C1=C()C(N())=C()C()=C1)N()	-1.15	logBB	BBB	Zhang et al., 2008
1255	24	N(C(=O)C()())C()()C()()C()()OC1=C()C()=C()C(=C1)C()()N1C()()C()()C()()C()()C1()	-0.46	logBB	BBB	Zhang et al., 2008
1256	33	C1=NC(C2=NOC(=N2)C()(C()())C()())=C2N1C1=C()C()=C()C(Cl)=C1C(=O)N(C()())C2()	-0.3	logBB	BBB	Zhang et al., 2008
1257	36	C(=C1C2=C(C()=C()C()=C2)C()()C()()C2=C1C()=C()C()=C2)C()()C()()N(C()())C()()	0.89	logBB	BBB	Zhang et al., 2008
1258	SKF89124	OC1=C()C()=C(C2=C1N()C(=O)C2())C()()C()()N(C()()C()()C()())C()()C()()C()()	-0.43	logBB	BBB	Zhang et al., 2008
1259	Org4428	OC12C3=C()C()=C()C()=C3OC3=C(C()=C()C()=C3C()())C1()C()()N(C()())C()()C2()	0.82	logBB	BBB	Zhang et al., 2008
1260	Org5222	C1=C()C2=C(C()=C1)C1()C()()N(C()())C()()C1()C1=C()C(Cl)=C()C()=C1O2	1.03	logBB	BBB	Zhang et al., 2008
1261	Org32104	OC12C3=C()C()=C()C()=C3OC3=C(C()=C()C()=C3C()())C1()C()()N()C()()C2()	0.52	logBB	BBB	Zhang et al., 2008
1262	Org30526	N1C()()C2()C3=C()C(Cl)=C()C()=C3OC3=C(C()=C()C()=C3)C2()C1()	0.39	logBB	BBB	Zhang et al., 2008
1263	9-OH risperidone	OC1()C2=NC(=C(C(=O)N2C()()C()()C1())C()()C()()N1C()()C()()C()(C2=NOC3=C2C()=C()C(F)=C3)C()()C1())C()()	-0.67	logBB	BBB	Zhang et al., 2008
1264	Compound 31	N(C()()C()()SC()()C1=C(Br)C()=C()C()=N1)C1()N=C()C()=C1[N+]([O-])=O	-0.67	logBB	BBB	Zhang et al., 2008
1265	Compound 32	N(C()()C()()SC()()C1=NC()=C()C()=C1)C1()N=C()C()=C1[N+]([O-])=O	-0.66	logBB	BBB	Zhang et al., 2008
1266	Compound 34	N()C(=NC1=NC(=C()S1)C1=C()C(N()C(=O)C()())=C()C()=C1)N()	-1.57	logBB	BBB	Zhang et al., 2008
1267	Compound 35	N(C()()C()()SC()()C1=C()C()=C(O1)C()()N(C()())C()())C1()N=C()C()=C1[N+]([O-])=O	-1.12	logBB	BBB	Zhang et al., 2008
1268	Compound 36	N(C1=C(C(=C()N1)C()()C1=C()C()=C()C()=C1)[N+]([O-])=O)C()()C()()SC()()C1=C()C()=C(O1)C()()N(C()())C()()	-0.73	logBB	BBB	Zhang et al., 2008
1269	Compound 37	N(C1=C()C()=C()C(=C1)C1=C()C()=C(O1)C()()N(C()())C()())C1()N=C()C()=C1[N+]([O-])=O	-0.27	logBB	BBB	Zhang et al., 2008
1270	Compound 38	N(C1=C()C()=C()C(=C1)C1=NC()=C()C(=C1)C()()N(C()())C()())C1()N=C()C()=C1[N+]([O-])=O	-0.28	logBB	BBB	Zhang et al., 2008
1271	Compound 40	N(C(=O)C1=C()C()=C()C()=C1)C()()C()()C()()OC1=C()C()=C()C(=C1)C()()N1C()()C()()C()()C()()C1()	-0.24	logBB	BBB	Zhang et al., 2008
1272	Compound 41	OC()()C()()C()()OC1=C()C(=C()C()=C1)C()()N1C()()C()()C()()C()()C1()	-0.02	logBB	BBB	Zhang et al., 2008
1273	Compound 42	N(C1=NC()=C()C()=C1)C()()C()()C()()OC1=C()C()=C()C(=C1)C()()N1C()()C()()C()()C()()C1()	0.69	logBB	BBB	Zhang et al., 2008
1274	Compound 43	N(C1=NC()=C()S1)C()()C()()C()()OC1=C()C(=C()C()=C1)C()()N1C()()C()()C()()C()()C1()	0.44	logBB	BBB	Zhang et al., 2008
1275	Compound 45	N(C1=NC2=C(O1)C()=C()C()=C2)C()()C()()C()()OC1=C()C(=C()C()=C1)C()()N1C()()C()()C()()C()()C1()	0.22	logBB	BBB	Zhang et al., 2008
1276	Nor-1-chlorpromazine	N(C()())C()()C()()C()()N1C2=C()C()=C()C()=C2SC2=C1C()=C(Cl)C()=C2	1.37	logBB	BBB	Zhang et al., 2008
1277	2-(3′-Iodo-4′-aminophenyl)-6-hydroxybenzothiazole	OC1=C()C2=C(N=C(S2)C2=C()C()=C(N())C(I)=C2)C()=C1	0.176	logBB	BBB	Zhang et al., 2008
1278	Lamotrigine	N()C1=NN=C(C(=N1)N())C1=C()C()=C()C(Cl)=C1Cl	-0.081	logBB	BBB	Zhang et al., 2008
1279	SB-656104-A	N1C()=C()C2=C()C()=C(C()=C12)S(=O)(=O)N1C()()C()()C()()C1()C()()C()()N1C()()C()()C()(OC2=C()C()=C()C(Cl)=C2)C()()C1()	-0.0457	logBB	BBB	Zhang et al., 2008
1280	Alovudine	OC()()C1()OC()(N2C()=C(C(=O)N()C2=O)C()())C()()C1()F	-0.605	logBB	BBB	Zhang et al., 2008
1281	Granisetron	N(C(=O)C1=NN(C2=C1C()=C()C()=C2)C()())C1()C()()C2()N(C()())C()(C()()C()()C2())C1()	-0.687	logBB	BBB	Zhang et al., 2008
1282	Zidovudine	OC()()C1()OC()(N2C()=C(C(=O)N()C2=O)C()())C()()C1()N=[N+]=[N-]	-0.886	logBB	BBB	Zhang et al., 2008
1283	Tamoxifen	C1=C()C()=C(C()=C1)C(=C(\C1=C()C()=C()C()=C1)C()()C()())\C1=C()C()=C(OC()()C()()N(C()())C()())C()=C1	0.924	logBB	BBB	Zhang et al., 2008
1284	Desmethyldesipramine	N()C()()C()()C()()N1C2=C(C()=C()C()=C2)C()()C()()C2=C1C()=C()C()=C2	1.06	logBB	BBB	Zhang et al., 2008
1285	Phenylbutazone	C1=C()C()=C(C()=C1)N1N(C(=O)C()(C1=O)C()()C()()C()()C()())C1=C()C()=C()C()=C1	-0.52	logBB	BBB	Zhang et al., 2008
1286	Desipramine	N(C()())C()()C()()C()()N1C2=C()C()=C()C()=C2C()()C()()C2=C1C()=C()C()=C2	1.2	logBB	BBB	Zhang et al., 2008
1287	Imipramine	C1=C()C()=C2C(=C1)N(C1=C()C()=C()C()=C1C()()C2())C()()C()()C()()N(C()())C()()	0.83	logBB	BBB	Zhang et al., 2008
1288	Thioridazine	C1=C()C2=C(C()=C1)N(C1=C(S2)C()=C()C(SC()())=C1)C()()C()()C1()N(C()())C()()C()()C()()C1()	0.24	logBB	BBB	Zhang et al., 2008
1289	Chlorpromazine	C1=C()C2=C(C()=C1)N(C1=C(S2)C()=C()C(Cl)=C1)C()()C()()C()()N(C()())C()()	1.06	logBB	BBB	Zhang et al., 2008
1290	Acetylsalicylic acid	OC(=O)C1=C(OC(=O)C()())C()=C()C()=C1	-0.5	logBB	BBB	Zhang et al., 2008
1291	Verapamil	C1=C()C(=C()C(OC()())=C1OC()())C()()C()()N(C()())C()()C()()C()()C(C#N)(C1=C()C(OC()())=C(OC()())C()=C1)C()(C()())C()()	-0.7	logBB	BBB	Zhang et al., 2008
1292	Haloperidol	OC1(C2=C()C()=C(Cl)C()=C2)C()()C()()N(C()()C()()C()()C(=O)C2=C()C()=C(F)C()=C2)C()()C1()	1.34	logBB	BBB	Zhang et al., 2008
1293	Indomethacin	OC(=O)C()()C1=C(N(C(=O)C2=C()C()=C(Cl)C()=C2)C2=C()C()=C(OC()())C()=C12)C()()	-1.26	logBB	BBB	Zhang et al., 2008
1294	Hexobarbital	N1C(=O)N(C(=O)C(C1=O)(C1=C()C()()C()()C()()C1())C()())C()()	0.1	logBB	BBB	Zhang et al., 2008
1295	Quinidine	OC()(C1=C()C()=NC2=C()C()=C(OC()())C()=C12)C1()N2C()()C()()C()(C1())C()(C()=C())C2()	-0.46	logBB	BBB	Zhang et al., 2008
1296	Morphine	OC1=C()C()=C2C3=C1OC1()C()(O)C()=C()C4()C()(N(C()())C()()C()()C314)C2()	-0.16	logBB	BBB	Zhang et al., 2008
1297	Phenytoin	N1C(=O)N()C(C1=O)(C1=C()C()=C()C()=C1)C1=C()C()=C()C()=C1	-0.04	logBB	BBB	Zhang et al., 2008
1298	Amobarbital	N1C(=O)N()C(=O)C(C1=O)(C()()C()())C()()C()()C()(C()())C()()	0.04	logBB	BBB	Zhang et al., 2008
1299	Physostigmine	N(C(=O)OC1=C()C2=C(C()=C1)N(C()())C1()N(C()())C()()C()()C21C()())C()()	0.079	logBB	BBB	Zhang et al., 2008
1300	Caffeine	C1=NC2=C(N1C()())C(=O)N(C(=O)N2C()())C()()	-0.055	logBB	BBB	Zhang et al., 2008
1301	Aminopyrine	C1=C()C()=C(C()=C1)N1N(C(=C(N(C()())C()())C1=O)C()())C()()	0	logBB	BBB	Zhang et al., 2008
1302	Promazine	C1=C()C2=C(C()=C1)N(C1=C(S2)C()=C()C()=C1)C()()C()()C()()N(C()())C()()	1.23	logBB	BBB	Zhang et al., 2008
1303	Theophylline	C1=NC2()C(=N1)N(C(=O)N(C2=O)C()())C()()	-0.29	logBB	BBB	Zhang et al., 2008
1304	Diethylether	C()()C()()OC()()C()()	0	logBB	BBB	Zhang et al., 2008
1305	Antipyrine	C1=C(N(N(C1=O)C1=C()C()=C()C()=C1)C()())C()()	-0.097	logBB	BBB	Zhang et al., 2008
1306	Ethanol	OC()()C()()	-0.16	logBB	BBB	Zhang et al., 2008
1307	2-Propanol	OC()(C()())C()()	-0.15	logBB	BBB	Zhang et al., 2008
1308	Propanone	C()()C(=O)C()()	-0.15	logBB	BBB	Zhang et al., 2008
1309	Trichloromethane	C(Cl)(Cl)Cl	0.29	logBB	BBB	Zhang et al., 2008
1310	Hydroxyzine	OC()()C()()OC()()C()()N1C()()C()()N(C()()C1())C()(C1=C()C()=C()C()=C1)C1=C()C()=C(Cl)C()=C1	0.39	logBB	BBB	Zhang et al., 2008
1311	Fluphenazine	OC()()C()()N1C()()C()()N(C()()C()()C()()N2C3=C()C(=C()C()=C3SC3=C2C()=C()C()=C3)C(F)(F)F)C()()C1()	1.51	logBB	BBB	Zhang et al., 2008
1312	Salicylic acid	OC(=O)C1=C(O)C()=C()C()=C1	-1.1	logBB	BBB	Zhang et al., 2008
1313	Propanol	OC()()C()()C()()	-0.16	logBB	BBB	Zhang et al., 2008
1314	Benzene	C1=C()C()=C()C()=C1	0.37	logBB	BBB	Zhang et al., 2008
1315	1,1,1-Trichloro-ethane	C()()C(Cl)(Cl)Cl	-0.6	logBB	BBB	Zhang et al., 2008
1316	2,2-Dimethylbutane	C()()C()()C(C()())(C()())C()()	1.04	logBB	BBB	Zhang et al., 2008
1317	1,1,1-Trifluro-2-chloroethane	C()(Cl)C(F)(F)F	-0.92	logBB	BBB	Zhang et al., 2008
1318	Methoxyflurane	C()()OC(F)(F)C()(Cl)Cl	0.25	logBB	BBB	Zhang et al., 2008
1319	Pentobarbital	N1C(=O)N()C(=O)C(C1=O)(C()()C()())C()(C()())C()()C()()C()()	0.12	logBB	BBB	Zhang et al., 2008
1320	Thiopental	N1C(=S)N()C(=O)C(C1=O)(C()()C()())C()(C()())C()()C()()C()()	-0.14	logBB	BBB	Zhang et al., 2008
1321	2-Methylpropanol	OC()()C()(C()())C()()	-0.17	logBB	BBB	Zhang et al., 2008
1322	Butanone	C()()C(=O)C()()C()()	-0.08	logBB	BBB	Zhang et al., 2008
1323	Trichloroethene	C(Cl)=C(Cl)Cl	0.34	logBB	BBB	Zhang et al., 2008
1324	Theobromine	N1C(=O)N(C2=C(N(C()=N2)C()())C1=O)C()()	-0.28	logBB	BBB	Zhang et al., 2008
1325	mepyramine	C1=C()C()=C()C(=N1)N(C()()C1=C()C()=C(OC()())C()=C1)C()()C()()N(C()())C()()	0.49	logBB	BBB	Zhang et al., 2008
1326	3-Methylpentane	C()()C()()C()(C()())C()()C()()	1.01	logBB	BBB	Zhang et al., 2008
1327	Methylcyclopentane	C()()C1()C()()C()()C()()C1()	0.93	logBB	BBB	Zhang et al., 2008
1328	Valproic acid	OC(=O)C()(C()()C()()C()())C()()C()()C()()	-0.22	logBB	BBB	Zhang et al., 2008
1329	Acetaminophen	OC1=C()C()=C(N()C(=O)C()())C()=C1	-0.31	logBB	BBB	Zhang et al., 2008
1330	2-Methylpentane	C()()C()()C()()C()(C()())C()()	0.97	logBB	BBB	Zhang et al., 2008
1331	Toluene	C1=C()C()=C(C()=C1)C()()	0.37	logBB	BBB	Zhang et al., 2008
1332	Pentane	C()()C()()C()()C()()C()()	0.76	logBB	BBB	Zhang et al., 2008
1333	Hexane	C()()C()()C()()C()()C()()C()()	0.8	logBB	BBB	Zhang et al., 2008
1334	Trifluoroperazine	C1=C()C2=C(C()=C1)N(C1=C()C(=C()C()=C1S2)C(F)(F)F)C()()C()()C()()N1C()()C()()N(C()())C()()C1()	1.44	logBB	BBB	Zhang et al., 2008
1335	Heptane	C()()C()()C()()C()()C()()C()()C()()	0.81	logBB	BBB	Zhang et al., 2008
1336	Halothane	C(Cl)(Br)C(F)(F)F	0.35	logBB	BBB	Zhang et al., 2008
1337	Methohexital	C()=C()C()()C1(C(=O)N()C(=O)N(C1=O)C()())C()(C#CC()()C()())C()()	-0.06	logBB	BBB	Zhang et al., 2008
1338	BCNU	N(C(=O)N(N=O)C()()C()()Cl)C()()C()()Cl	-0.52	logBB	BBB	Zhang et al., 2008
1339	carbamazepine	N()C(=O)N1C2=C()C()=C()C()=C2C()=C()C2=C1C()=C()C()=C2	0	logBB	BBB	Zhang et al., 2008
1340	Chlorambucil	OC(=O)C()()C()()C()()C1=C()C()=C(C()=C1)N(C()()C()()Cl)C()()C()()Cl	-1.7	logBB	BBB	Zhang et al., 2008
1341	Fluroxene	C()=C()OC()()C(F)(F)F	0.13	logBB	BBB	Zhang et al., 2008
1342	Teflurane	C(F)(Br)C(F)(F)F	0.27	logBB	BBB	Zhang et al., 2008
1343	Diazepam	C1=C()C()=C(C()=C1)C1=NC()()C(=O)N(C2=C()C()=C(Cl)C()=C12)C()()	0.52	logBB	BBB	Zhang et al., 2008
1344	Salicyluric acid	OC(=O)C()()N()C(=O)C1=C(O)C()=C()C()=C1	-0.44	logBB	BBB	Zhang et al., 2008
1345	Propanolol	OC()(C()()OC1=C2C()=C()C()=C()C2=C()C()=C1)C()()N()C()(C()())C()()	0.64	logBB	BBB	Zhang et al., 2008
1346	3-Methylhexane	C()()C()()C()()C()(C()())C()()C()()	0.9	logBB	BBB	Zhang et al., 2008
1347	Oxazepam	OC1()N=C(C2=C()C()=C()C()=C2)C2=C()C(Cl)=C()C()=C2N()C1=O	0.61	logBB	BBB	Zhang et al., 2008
1348	Paraxanthine	N1C2=C(N(C()=N2)C()())C(=O)N(C1=O)C()()	0.06	logBB	BBB	Zhang et al., 2008
1349	Desmethyldiazepam	N1C2=C()C()=C(Cl)C()=C2C(=NC()()C1=O)C1=C()C()=C()C()=C1	0.5	logBB	BBB	Zhang et al., 2008
1350	Codeine	OC1()C()=C()C2()C3()N(C()())C()()C()()C22C4=C(C()=C()C(OC()())=C4OC12)C3()	0.55	logBB	BBB	Zhang et al., 2008
1351	Flunitrazepam	C1=C()C(F)=C(C()=C1)C1=NC()()C(=O)N(C2=C()C()=C(C()=C12)[N+]([O-])=O)C()()	0.06	logBB	BBB	Zhang et al., 2008
1352	Nor-2-chlorpromazine	N()C()()C()()C()()N1C2=C(SC3=C1C()=C(Cl)C()=C3)C()=C()C()=C2	0.97	logBB	BBB	Zhang et al., 2008
1353	Desmonomethylpromazine	N(C()())C()()C()()C()()N1C2=C(SC3=C1C()=C()C()=C3)C()=C()C()=C2	0.59	logBB	BBB	Zhang et al., 2008
1354	clonidine	N(C1=NC()()C()()N1)C1=C(Cl)C()=C()C()=C1Cl	0.11	logBB	BBB	Zhang et al., 2008
1355	Mesoridazine	C1=C()C2=C(C()=C1)N(C1=C()C(=C()C()=C1S2)S(=O)C()())C()()C()()C1()N(C()())C()()C()()C()()C1()	-0.36	logBB	BBB	Zhang et al., 2008
1356	Tibolone	OC1(C#C)C()()C()()C2()C3()C()(C4=C(C()()C(=O)C()()C4())C()()C3()C()())C()()C()()C12C()()	0.4	logBB	BBB	Zhang et al., 2008
1357	Y-G14	N(C()())C()()C()()C1=C()C()=C()C()=N1	-0.3	logBB	BBB	Zhang et al., 2008
1358	Y-G15	C1=NC(=C()C()=C1)C()()C()()N(C()())C()()	-0.06	logBB	BBB	Zhang et al., 2008
1359	2	N()C(=NC1=NC(=C()S1)C()())N()	-0.04	logBB	BBB	Zhang et al., 2008
1360	Bromperidol	OC1(C2=C()C()=C(Br)C()=C2)C()()C()()N(C()()C()()C()()C(=O)C2=C()C()=C(F)C()=C2)C()()C1()	1.38	logBB	BBB	Zhang et al., 2008
1361	Northioridazine	N1C()()C()()C()()C()(C()()C()()N2C3=C()C(SC()())=C()C()=C3SC3=C2C()=C()C()=C3)C1()	0.75	logBB	BBB	Zhang et al., 2008
1362	Enflurane	C(F)(F)OC(F)(F)C()(F)Cl	0.24	logBB	BBB	Zhang et al., 2008
1363	Sulforidazine	C1=C()C2=C(C()=C1)N(C1=C()C(=C()C()=C1S2)S(=O)(=O)C()())C()()C()()C1()N(C()())C()()C()()C()()C1()	0.18	logBB	BBB	Zhang et al., 2008
1364	Ibuprofen	OC(=O)C()(C1=C()C()=C(C()=C1)C()()C()(C()())C()())C()()	-0.18	logBB	BBB	Zhang et al., 2008
1365	Y-G16	N()C()()C()()C1=NC()=C()S1	-0.42	logBB	BBB	Zhang et al., 2008
1366	Clobazam	C1=C()C()=C(C()=C1)N1C2=C()C(Cl)=C()C()=C2N(C(=O)C()()C1=O)C()()	0.35	logBB	BBB	Zhang et al., 2008
1367	Desmethylclobazam	N1C2=C()C()=C(Cl)C()=C2N(C2=C()C()=C()C()=C2)C(=O)C()()C1=O	0.36	logBB	BBB	Zhang et al., 2008
1368	Mianserin	C1=C()C2=C(C()=C1)C1()N(C3=C()C()=C()C()=C3C2())C()()C()()N(C()())C1()	0.99	logBB	BBB	Zhang et al., 2008
1369	Isoflurane	C(F)(F)OC()(Cl)C(F)(F)F	0.42	logBB	BBB	Zhang et al., 2008
1370	Triazolam	C1=C()C(Cl)=C(C()=C1)C1=NC()()C2=NN=C(N2C2=C()C()=C(Cl)C()=C12)C()()	0.74	logBB	BBB	Zhang et al., 2008
1371	Alprazolam	C1=C()C()=C(C()=C1)C1=NC()()C2=NN=C(N2C2=C1C()=C(Cl)C()=C2)C()()	0.044	logBB	BBB	Zhang et al., 2008
1372	Atenolol	OC()(C()()OC1=C()C()=C(C()=C1)C()()C(=O)N())C()()N()C()(C()())C()()	-1.42	logBB	BBB	Zhang et al., 2008
1373	Zidovudine	OC()()C1()OC()(N2C()=C(C(=O)N()C2=O)C()())C()()C1()N()[N+]()=[N-]	-0.72	logBB	BBB	Zhang et al., 2008
1374	Carbamazepine-10,11-epoxide	N()C(=O)N1C2=C(C()=C()C()=C2)C2()OC2()C2=C1C()=C()C()=C2	-0.35	logBB	BBB	Zhang et al., 2008
1375	Y-G20	N()C()()C()()C1=C()N2C()=C()C()=C()C2=N1	-1.4	logBB	BBB	Zhang et al., 2008
1376	Cimetidine	N(\C(=N/C#N)N()C()()C()()SC()()C1=NC()=NC1()C()())C()()	-1.42	logBB	BBB	Zhang et al., 2008
1377	Domperidone	N1C(=O)N(C2=C()C()=C()C()=C12)C()()C()()C()()N1C()()C()()C()(N2C(=O)N()C3=C()C(Cl)=C()C()=C23)C()()C1()	-0.78	logBB	BBB	Zhang et al., 2008
1378	Midazolam	C1=C2N(C(=N1)C()())C1=C(C()=C(Cl)C()=C1)C(=NC2())C1=C(F)C()=C()C()=C1	0.36	logBB	BBB	Zhang et al., 2008
1379	4-Hydroxymidazolam	OC1()N=C(C2=C()C(Cl)=C()C()=C2N2C(=NC()=C12)C()())C1=C(F)C()=C()C()=C1	-0.3	logBB	BBB	Zhang et al., 2008
1380	1-Hydroxymidazolam	OC()()C1=NC()=C2N1C1=C()C()=C(Cl)C()=C1C(=NC2())C1=C(F)C()=C()C()=C1	-0.07	logBB	BBB	Zhang et al., 2008
1381	Mirtazapine	C1=NC2=C(C()=C1)C()()C1=C()C()=C()C()=C1C1()N2C()()C()()N(C()())C1()	0.53	logBB	BBB	Zhang et al., 2008
1382	Y-G19	N()C()()C()()C1=NC(=C()S1)C1=C()C()=C()C()=C1	-1.3	logBB	BBB	Zhang et al., 2008
1383	ranitidine	N(\C(N()C()()C()()SC()()C1=C()C()=C(O1)C()()N(C()())C()())=C(\)[N+]([O-])=O)C()()	-1.23	logBB	BBB	Zhang et al., 2008
1384	Tiotidine	N()C(=NC1=NC(=C()S1)C()()SC()()C()()N()C(=N/C#N)\N()C()())N()	-0.82	logBB	BBB	Zhang et al., 2008
1385	Didanosine	OC()()C1()OC()(N2C()=NC3=C2N()C()=NC3=O)C()()C1()	-1.3	logBB	BBB	Zhang et al., 2008
1386	SKF93319	N(C1=NC()=C(C(=O)N1)C()()C1=NC(=C()C()=C1)C()())C()()C()()C()()C()()C1=C(OC()())C()=C()C()=N1	-1.3	logBB	BBB	Zhang et al., 2008
1387	Icotidine	N(C1=NC(=O)C(=C()N1)C()()C1=C()N=C(C()=C1)C()())C()()C()()C()()C()()C1=NC()=C()C()=C1OC()()	-2	logBB	BBB	Zhang et al., 2008
1388	Flumazenil	C1=NC(C(=O)OC()()C()())=C2N1C1=C()C()=C(F)C()=C1C(=O)N(C()())C2()	-0.29	logBB	BBB	Zhang et al., 2008
1389	Lupitidine	N()C(C1=C()C()=C(O1)C()()SC()()C()()N()C1=NC()=C(C(=O)N1)C()()C1=C()C()=C(N=C1)C()())(C()())C()()	-1.06	logBB	BBB	Zhang et al., 2008
1390	Bretazenil	C1=NC(C(=O)OC(C()())(C()())C()())=C2N1C1=C()C()=C()C(Br)=C1C(=O)N1C()()C()()C()()C21	-0.09	logBB	BBB	Zhang et al., 2008
1391	Temelastine	N(C1=NC(=O)C(=C()N1)C()()C1=C()C()=C(N=C1)C()())C()()C()()C()()C()()C1=C(C()=C(Br)C()=N1)C()()	-1.88	logBB	BBB	Zhang et al., 2008
1392	SKF101468	N1C2=C(C(=C()C()=C2)C()()C()()N(C()()C()()C()())C()()C()()C()())C()()C1=O	0.25	logBB	BBB	Zhang et al., 2008
1393	Phenserine	N(C(=O)OC1=C()C2=C(C()=C1)N(C()())C1()N(C()())C()()C()()C21C()())C1=C()C()=C()C()=C1	1	logBB	BBB	Zhang et al., 2008
1394	Zolantidine	N(C1=NC2=C(S1)C()=C()C()=C2)C()()C()()C()()OC1=C()C(=C()C()=C1)C()()N1C()()C()()C()()C()()C1()	0.14	logBB	BBB	Zhang et al., 2008
1395	Thioperamide	N(C(=S)N1C()()C()()C()(C2=C()N=C()N2)C()()C1())C1()C()()C()()C()()C()()C1()	-0.161	logBB	BBB	Zhang et al., 2008
1396	Risperidone	C1=C2C(ON=C2C2()C()()C()()N(C()()C()()C3=C(N=C4N(C3=O)C()()C()()C()()C4())C()())C()()C2())=C()C(F)=C1	-0.02	logBB	BBB	Zhang et al., 2008
1397	MIL-663581	OC(C1=NC(=NO1)C1=C2N(C()=N1)C1=C()C()=C()C(Cl)=C1C(=O)N(C()())C2())(C()())C()()	-1.34	logBB	BBB	Zhang et al., 2008
1398	Nevirapine	N1C2=C(N=C()C()=C2C()())N(C2=C(C()=C()C()=N2)C1=O)C1()C()()C1()	0	logBB	BBB	Zhang et al., 2008
1399	SKF-93619	N(C1=NC(=O)C(=C()N1)C()()C1=C()C()=C2C()=C()C()=C()C2=C1)C()()C()()SC()()C1=C()C()=C(O1)C()()N(C()())C()()	-1.3	logBB	BBB	Zhang et al., 2008
1400	Indinavir	OC()(C()()N1C()()C()()N(C()()C2=C()C()=C()N=C2)C()()C1()C(=O)N()C(C()())(C()())C()())C()()C()(C(=O)N()C1()C2=C(C()=C()C()=C2)C()()C1()O)C()()C1=C()C()=C()C()=C1	-0.74	logBB	BBB	Zhang et al., 2008
1401	SB-222200	N(C(=O)C1=C(C(=NC2=C()C()=C()C()=C12)C1=C()C()=C()C()=C1)C()())C()(C1=C()C()=C()C()=C1)C()()C()()	0.3	logBB	BBB	Zhang et al., 2008
1402	Benzene	C1=CC=CC=C1	-0.12	pIGC50	TP	Zhu et al., 2008
1403	4-xylene	CC1=CC=C(C=C1)C	0.25	pIGC50	TP	Zhu et al., 2008
1404	Toluene	CC1=CC=CC=C1	0.25	pIGC50	TP	Zhu et al., 2008
1405	n-Butylbenzene	CCCCC1=CC=CC=C1	1.25	pIGC50	TP	Zhu et al., 2008
1406	n-Amylbenzene	CCCCCC1=CC=CC=C1	1.79	pIGC50	TP	Zhu et al., 2008
1407	Benzylamine	C1=CC=C(C=C1)CN	-0.24	pIGC50	TP	Zhu et al., 2008
1408	Isopropylbenzene	CC(C)C1=CC=CC=C1	0.69	pIGC50	TP	Zhu et al., 2008
1409	5-Phenyl-1-pentanol	C1=CC=C(C=C1)CCCCCO	0.42	pIGC50	TP	Zhu et al., 2008
1410	a,a-Dimethylbenzenepropanol	CC(C)(CCC1=CC=CC=C1)O	-0.07	pIGC50	TP	Zhu et al., 2008
1411	3-Phenyl-1-propanol	C1=CC=C(C=C1)CCCO	-0.21	pIGC50	TP	Zhu et al., 2008
1412	Benzyl alcohol	C1=CC=C(C=C1)CO	-0.83	pIGC50	TP	Zhu et al., 2008
1413	(Sec)phenethyl alcohol	CC(C1=CC=CC=C1)O	-0.66	pIGC50	TP	Zhu et al., 2008
1414	4-Ethylbenzyl alcohol	CCC1=CC=C(C=C1)CO	0.07	pIGC50	TP	Zhu et al., 2008
1415	(R+-)-1-Phenyl-1-butanol	CCCC(C1=CC=CC=C1)O	-0.01	pIGC50	TP	Zhu et al., 2008
1416	4-Biphenylmethanol	C1=CC=C(C=C1)C2=CC=C(C=C2)CO	0.92	pIGC50	TP	Zhu et al., 2008
1417	4-Ethylbiphenyl	CCc1ccc(c2ccccc2)cc1	1.97	pIGC50	TP	Zhu et al., 2008
1418	Biphenyl	C1=CC=C(C=C1)C2=CC=CC=C2	1.05	pIGC50	TP	Zhu et al., 2008
1419	(±)-1,2-Diphenyl-2-propanol	CC(CC1=CC=CC=C1)(C2=CC=CC=C2)O	0.8	pIGC50	TP	Zhu et al., 2008
1420	1,1-Diphenyl-2-propanol	CC(C(C1=CC=CC=C1)C2=CC=CC=C2)O	0.75	pIGC50	TP	Zhu et al., 2008
1421	4-Dimethylaniline	CC1=C(C=C(C=C1)N)C	-0.16	pIGC50	TP	Zhu et al., 2008
1422	3-Aminobenzyl alcohol	NC1=CC(CO)=CC=C1	-1.13	pIGC50	TP	Zhu et al., 2008
1423	4-Butoxyaniline	CCCCOC1=CC=C(C=C1)N	0.61	pIGC50	TP	Zhu et al., 2008
1424	4-Methylaniline	CC1=CC=C(C=C1)N	-0.05	pIGC50	TP	Zhu et al., 2008
1425	3-Ethylaniline	CCC1=CC(=CC=C1)N	-0.03	pIGC50	TP	Zhu et al., 2008
1426	4-Ethylaniline	CCC1=CC=C(C=C1)N	0.03	pIGC50	TP	Zhu et al., 2008
1427	3-Methylaniline	CC1=CC(=CC=C1)N	-0.28	pIGC50	TP	Zhu et al., 2008
1428	2,6-Diisopropylaniline	CC(C)C1=C(C(=CC=C1)C(C)C)N	0.76	pIGC50	TP	Zhu et al., 2008
1429	2-Ethylaniline	CCC1=CC=CC=C1N	-0.22	pIGC50	TP	Zhu et al., 2008
1430	2,6-Diethylaniline	CCC1=C(C(=CC=C1)CC)N	0.31	pIGC50	TP	Zhu et al., 2008
1431	4-Methoxyphenol	COC1=CC=C(C=C1)O	-0.14	pIGC50	TP	Zhu et al., 2008
1432	3,4,5-Trimethylphenol	CC1=CC(=CC(=C1C)C)O	0.93	pIGC50	TP	Zhu et al., 2008
1433	Benzyl Chloride	C1=CC=C(C=C1)CCl	0.06	pIGC50	TP	Zhu et al., 2008
1434	4-Methylanisole	CC1=CC=C(C=C1)OC	0.25	pIGC50	TP	Zhu et al., 2008
1435	4-(Tert)butylphenol	CC(C)(C)C1=CC=C(C=C1)O	0.91	pIGC50	TP	Zhu et al., 2008
1436	Anisole	COC1=CC=CC=C1	-0.1	pIGC50	TP	Zhu et al., 2008
1437	4-Ethylphenol	CCC1=CC=C(C=C1)O	0.21	pIGC50	TP	Zhu et al., 2008
1438	3-Ethylphenol	CCC1=CC(=CC=C1)O	0.29	pIGC50	TP	Zhu et al., 2008
1439	o-Cresol (2-methylphenol)	CC1=CC=CC=C1O	-0.29	pIGC50	TP	Zhu et al., 2008
1440	2-Ethylphenol	CCC1=CC=CC=C1O	0.16	pIGC50	TP	Zhu et al., 2008
1441	Phenol	C1=CC=C(C=C1)O	-0.35	pIGC50	TP	Zhu et al., 2008
1442	2-Allylphenol	C=CCC1=CC=CC=C1O	0.33	pIGC50	TP	Zhu et al., 2008
1443	Iodobenzene	C1=CC=C(C=C1)I	0.36	pIGC50	TP	Zhu et al., 2008
1444	4-Chloroaniline	C1=CC(=CC=C1N)Cl	0.05	pIGC50	TP	Zhu et al., 2008
1445	4-Hydroxyphenethyl alcohol	OC1=CC=C(CCO)C=C1	-0.83	pIGC50	TP	Zhu et al., 2008
1446	2-Chloro-4-methylaniline	CC1=CC(=C(C=C1)N)Cl	0.18	pIGC50	TP	Zhu et al., 2008
1447	5-Pentylresorcinol	CCCCCC1=CC(=CC(=C1)O)O	1.31	pIGC50	TP	Zhu et al., 2008
1448	3-Methoxyphenol	COC1=CC=CC(=C1)O	-0.33	pIGC50	TP	Zhu et al., 2008
1449	4-Hexylresorcinol	CCCCCCC1=C(C=C(C=C1)O)O	1.8	pIGC50	TP	Zhu et al., 2008
1450	4-Bromotoluene	CC1=CC=C(C=C1)Br	0.47	pIGC50	TP	Zhu et al., 2008
1451	4-Chloroanisole	COC1=CC=C(C=C1)Cl	0.6	pIGC50	TP	Zhu et al., 2008
1452	1,3-Dihydroxybenzene	C1=CC(=CC(=C1)O)O	-0.65	pIGC50	TP	Zhu et al., 2008
1453	Bromobenzene	C1=CC=C(C=C1)Br	0.08	pIGC50	TP	Zhu et al., 2008
1454	4-Iodophenol	C1=CC(=CC=C1O)I	0.85	pIGC50	TP	Zhu et al., 2008
1455	2(4-Chlorophenyl)ethylamine	C1=CC(=CC=C1CCN)Cl	0.14	pIGC50	TP	Zhu et al., 2008
1456	4-Chlorobenzylamine	C1=CC(=CC=C1CN)Cl	0.16	pIGC50	TP	Zhu et al., 2008
1457	2,4-Dichloroaniline	C1=CC(=C(C=C1Cl)Cl)N	0.56	pIGC50	TP	Zhu et al., 2008
1458	3-Chloroaniline	C1=CC(=CC(=C1)Cl)N	0.22	pIGC50	TP	Zhu et al., 2008
1459	4-(Pentyloxy)benzaldehyde	CCCCCOC1=CC=C(C=C1)C=O	1.18	pIGC50	TP	Zhu et al., 2008
1460	4-Nitrotoluene	CC1=CC=C(C=C1)[N+](=O)[O-]	0.65	pIGC50	TP	Zhu et al., 2008
1461	4-Isopropylbenzaldehyde	CC(C)C1=CC=C(C=C1)C=O	0.67	pIGC50	TP	Zhu et al., 2008
1462	1,2-Dimethyl-3-nitrobenzene	CC1=C(C(=CC=C1)[N+](=O)[O-])C	0.56	pIGC50	TP	Zhu et al., 2008
1463	3-Chlorophenol	C1=CC(=CC(=C1)Cl)O	0.87	pIGC50	TP	Zhu et al., 2008
1464	3-Nitrotoluene	CC1=CC(=CC=C1)[N+](=O)[O-]	0.42	pIGC50	TP	Zhu et al., 2008
1465	2-Nitrotoluene	CC1=CC=CC=C1[N+](=O)[O-]	0.26	pIGC50	TP	Zhu et al., 2008
1466	1,4-Dibromobenzene	C1=CC(=CC=C1Br)Br	0.68	pIGC50	TP	Zhu et al., 2008
1467	Benzaldehyde	C1=CC=C(C=C1)C=O	-0.2	pIGC50	TP	Zhu et al., 2008
1468	3-Methoxy-4-hydroxybenzaldehyde	COC1=C(C=CC(=C1)C=O)O	-0.03	pIGC50	TP	Zhu et al., 2008
1469	2,4-Dichlorophenol	C1=CC(=C(C=C1Cl)Cl)O	1.04	pIGC50	TP	Zhu et al., 2008
1470	Valerophenone	CCCCC(=O)C1=CC=CC=C1	0.56	pIGC50	TP	Zhu et al., 2008
1471	Butyrophenone	CCCC(=O)C1=CC=CC=C1	0.21	pIGC50	TP	Zhu et al., 2008
1472	Heptanophenone	CCCCCCC(=O)C1=CC=CC=C1	1.56	pIGC50	TP	Zhu et al., 2008
1473	Acetophenone	CC(=O)C1=CC=CC=C1	-0.46	pIGC50	TP	Zhu et al., 2008
1474	Nitrobenzene	C1=CC=C(C=C1)[N+](=O)[O-]	0.14	pIGC50	TP	Zhu et al., 2008
1475	Octanophenone	CCCCCCCC(=O)C1=CC=CC=C1	1.89	pIGC50	TP	Zhu et al., 2008
1476	3-Nitroaniline	C1=CC(=CC(=C1)[N+](=O)[O-])N	0.03	pIGC50	TP	Zhu et al., 2008
1477	3,5-Dichloroaniline	C1=C(C=C(C=C1Cl)Cl)N	0.71	pIGC50	TP	Zhu et al., 2008
1478	4-Bromo-6-chloro-2-cresol	CC1=CC(=CC(=C1O)Cl)Br	1.28	pIGC50	TP	Zhu et al., 2008
1479	Benzophenone	C1=CC=C(C=C1)C(=O)C2=CC=CC=C2	0.87	pIGC50	TP	Zhu et al., 2008
1480	4-Nitrobenzyl Chloride	clCC1=CC=C([N+](=O)[O-])C=C1	1.18	pIGC50	TP	Zhu et al., 2008
1481	2-Hydroxy-4-methoxyacetophenone	CC(=O)C1=C(C=C(C=C1)OC)O	0.55	pIGC50	TP	Zhu et al., 2008
1482	3,5-Dichlorophenol	C1=C(C=C(C=C1Cl)Cl)O	1.56	pIGC50	TP	Zhu et al., 2008
1483	4-Chlorobenzaldehyde	C1=CC(=CC=C1C=O)Cl	0.4	pIGC50	TP	Zhu et al., 2008
1484	1,3,5-Trichlorobenzene	C1=C(C=C(C=C1Cl)Cl)Cl	0.87	pIGC50	TP	Zhu et al., 2008
1485	2,4,5-Trichloroaniline	C1=C(C(=CC(=C1Cl)Cl)Cl)N	1.3	pIGC50	TP	Zhu et al., 2008
1486	4-Bromobenzophenone	C1=CC=C(C=C1)C(=O)C2=CC=C(C=C2)Br	1.26	pIGC50	TP	Zhu et al., 2008
1487	2,4,6-Trichlorophenol	C1=C(C=C(C(=C1Cl)O)Cl)Cl	1.41	pIGC50	TP	Zhu et al., 2008
1488	5-Bromovanillin	COC1=C(C(=CC(=C1)C=O)Br)O	0.62	pIGC50	TP	Zhu et al., 2008
1489	4-Nitrophenetole	CCOC1=CC=C(C=C1)[N+](=O)[O-]	0.83	pIGC50	TP	Zhu et al., 2008
1490	4-Chloro-2-nitrotoluene	CC1=C(C=C(C=C1)Cl)[N+](=O)[O-]	0.82	pIGC50	TP	Zhu et al., 2008
1491	4-Bromo-2,6-dichlorophenol	C1=C(C=C(C(=C1Cl)O)Cl)Br	1.78	pIGC50	TP	Zhu et al., 2008
1492	2-Chloro-6-nitrotoluene	CC1=C(C=CC=C1Cl)[N+](=O)[O-]	0.68	pIGC50	TP	Zhu et al., 2008
1493	2,3,5,6-Tetrachloroaniline	C1=C(C(=C(C(=C1Cl)Cl)N)Cl)Cl	1.76	pIGC50	TP	Zhu et al., 2008
1494	3-Nitrobenzonitrile	C1=CC(=CC(=C1)[N+](=O)[O-])C#N	0.45	pIGC50	TP	Zhu et al., 2008
1495	2,4,5-Trichlorophenol	C1=C(C(=CC(=C1Cl)Cl)Cl)O	2.1	pIGC50	TP	Zhu et al., 2008
1496	1,2,4,5-Tetrachlorobenzene	C1=C(C(=CC(=C1Cl)Cl)Cl)Cl	2	pIGC50	TP	Zhu et al., 2008
1497	1-Chloro-3-nitrobenzene	C1=CC(=CC(=C1)Cl)[N+](=O)[O-]	0.73	pIGC50	TP	Zhu et al., 2008
1498	2,3,4,5-Tetrachloroaniline	C1=C(C(=C(C(=C1Cl)Cl)Cl)Cl)N	1.96	pIGC50	TP	Zhu et al., 2008
1499	2,4,6-Bromophenol	C1=C(C=C(C(=C1Br)O)Br)Br	1.91	pIGC50	TP	Zhu et al., 2008
1500	2-Bromo-5-nitrotoluene	CC1=C(C=CC(=C1)[N+](=O)[O-])Br	1.16	pIGC50	TP	Zhu et al., 2008
1501	5-Hydroxy-2-nitrobenzaldehyde	C1=CC(=C(C=C1O)C=O)[N+](=O)[O-]	0.33	pIGC50	TP	Zhu et al., 2008
1502	3,4,5,6-Tetrabromo-2-cresol	CC1=C(C(=C(C(=C1Br)Br)Br)Br)O	2.57	pIGC50	TP	Zhu et al., 2008
1503	2,3,4,6-Tetrachlorophenol	C1=C(C(=C(C(=C1Cl)Cl)Cl)O)Cl	2.18	pIGC50	TP	Zhu et al., 2008
1504	Pentafluoroaniline	C1(=C(C(=C(C(=C1F)F)F)F)F)N	0.26	pIGC50	TP	Zhu et al., 2008
1505	3,5-Dibromosalicylaldehyde	C1=C(C=C(C(=C1Br)O)C=O)Br	1.65	pIGC50	TP	Zhu et al., 2008
1506	3,5-Dichloronitrobenzene	C1=C(C=C(C=C1Cl)Cl)[N+](=O)[O-]	1.13	pIGC50	TP	Zhu et al., 2008
1507	4-Chloro-3-nitrophenol	C1=CC(=C(C=C1O)[N+](=O)[O-])Cl	1.27	pIGC50	TP	Zhu et al., 2008
1508	2,3,4,5-Tetrachlorophenol	C1=C(C(=C(C(=C1Cl)Cl)Cl)Cl)O	2.72	pIGC50	TP	Zhu et al., 2008
1509	Thiobenzamide	C1=CC=C(C=C1)C(=S)N	0.09	pIGC50	TP	Zhu et al., 2008
1510	a,a,a-4-Tetrafluoro-3-toluidine	C1=CC(=C(C=C1N)C(F)(F)F)F	0.77	pIGC50	TP	Zhu et al., 2008
1511	1-Chloro-2-nitrobenzene	C1=CC=C(C(=C1)[N+](=O)[O-])Cl	0.68	pIGC50	TP	Zhu et al., 2008
1512	1,3-Dinitrobenzene	C1=CC(=CC(=C1)[N+](=O)[O-])[N+](=O)[O-]	0.76	pIGC50	TP	Zhu et al., 2008
1513	2,4-Dinitrotoluene	CC1=C(C=C(C=C1)[N+](=O)[O-])[N+](=O)[O-]	0.87	pIGC50	TP	Zhu et al., 2008
1514	4,5-Dichloro-2-nitroaniline	C1=C(C(=CC(=C1Cl)Cl)[N+](=O)[O-])N	1.66	pIGC50	TP	Zhu et al., 2008
1515	Pentafluorophenol b	C1(=C(C(=C(C(=C1F)F)F)F)F)O	1.63	pIGC50	TP	Zhu et al., 2008
1516	3-Chloro-4-fluoronitrobenzene	C1=CC(=C(C=C1[N+](=O)[O-])Cl)F	0.8	pIGC50	TP	Zhu et al., 2008
1517	3,4-Dichloronitrobenzene	C1=CC(=C(C=C1[N+](=O)[O-])Cl)Cl	1.16	pIGC50	TP	Zhu et al., 2008
1518	2.5-Dichloronitrobenzene	C1=CC(=C(C=C1Cl)[N+](=O)[O-])Cl	1.13	pIGC50	TP	Zhu et al., 2008
1519	2,4-Dichloronitrobenzene	C1=CC(=C(C=C1Cl)Cl)[N+](=O)[O-]	0.99	pIGC50	TP	Zhu et al., 2008
1520	Phenyl isothiocyanate	C1=CC=C(C=C1)N=C=S	1.41	pIGC50	TP	Zhu et al., 2008
1521	3-Trifluoromethyl-4-nitrophenol	C1=CC(=C(C=C1O)C(F)(F)F)[N+](=O)[O-]	1.65	pIGC50	TP	Zhu et al., 2008
1522	2,6-Iodo-4-nitrophenol b	C1=C(C=C(C(=C1I)O)I)[N+](=O)[O-]	1.81	pIGC50	TP	Zhu et al., 2008
1523	2,4-Chloro-6-nitrophenol b	C1=C(C=C(C(=C1Cl)O)[N+](=O)[O-])Cl	1.75	pIGC50	TP	Zhu et al., 2008
1524	1,2,3-Trichloro-4-nitrobenzene	C1=CC(=C(C(=C1[N+](=O)[O-])Cl)Cl)Cl	1.51	pIGC50	TP	Zhu et al., 2008
1525	Pentafluorobenzaldehyde	C(=O)C1=C(C(=C(C(=C1F)F)F)F)F	0.82	pIGC50	TP	Zhu et al., 2008
1526	2,4-Dinitro-1-iodobenzene	C1=CC(=C(C=C1[N+](=O)[O-])[N+](=O)[O-])I	2.12	pIGC50	TP	Zhu et al., 2008
1527	2,4-Dinitroaniline	C1=CC(=C(C=C1[N+](=O)[O-])[N+](=O)[O-])N	0.72	pIGC50	TP	Zhu et al., 2008
1528	1,2,3-Trifluoro-4-nitrobenzene	C1=CC(=C(C(=C1[N+](=O)[O-])F)F)F	1.89	pIGC50	TP	Zhu et al., 2008
1529	1,2-Dichloro-4,5-dinitrobenzene	C1=C(C(=CC(=C1Cl)Cl)[N+](=O)[O-])[N+](=O)[O-]	2.21	pIGC50	TP	Zhu et al., 2008
1530	4,6-Dinitro-2-methylphenol	CC1=CC(=CC(=C1O)[N+](=O)[O-])[N+](=O)[O-]	1.73	pIGC50	TP	Zhu et al., 2008
1531	4-(Tert)butyl-2,6-dinitrophenol	CC(C)(C)C1=CC(=C(C(=C1)[N+](=O)[O-])O)[N+](=O)[O-]	1.8	pIGC50	TP	Zhu et al., 2008
1532	1-Bromo-2,4-dinitrobenzene	C1=CC(=C(C=C1[N+](=O)[O-])[N+](=O)[O-])Br	2.31	pIGC50	TP	Zhu et al., 2008
1533	2,4-Dinitrophenol(nonneutralized)	C1=CC(=C(C=C1[N+](=O)[O-])[N+](=O)[O-])O	1.06	pIGC50	TP	Zhu et al., 2008
1534	1,5-Dichloro-2,3-dinitrobenzene	C1=C(C=C(C(=C1Cl)[N+](=O)[O-])[N+](=O)[O-])Cl	2.42	pIGC50	TP	Zhu et al., 2008
1535	2,3,4,6-Tetrafluoronitrobenzene	C1=C(C(=C(C(=C1F)F)F)[N+](=O)[O-])F	1.87	pIGC50	TP	Zhu et al., 2008
1536	2,6-Dinitrophenol	C1=CC(=C(C(=C1)[N+](=O)[O-])O)[N+](=O)[O-]	0.83	pIGC50	TP	Zhu et al., 2008
1537	1-Chloro-2,4-dinitrobenzene	C1=CC(=C(C=C1[N+](=O)[O-])[N+](=O)[O-])Cl	2.16	pIGC50	TP	Zhu et al., 2008
1538	2,4-Dinitro-1-fluorobenzene	C1=CC(=C(C=C1[N+](=O)[O-])[N+](=O)[O-])F	1.71	pIGC50	TP	Zhu et al., 2008
1539	Pentafluoronitrobenzene	C1(=C(C(=C(C(=C1F)F)F)F)F)[N+](=O)[O-]	2.43	pIGC50	TP	Zhu et al., 2008
1540	1,4-Dinitrotetrachlorobenzene	C1(=C(C(=C(C(=C1Cl)Cl)[N+](=O)[O-])Cl)Cl)[N+](=O)[O-]	2.82	pIGC50	TP	Zhu et al., 2008
1541	1,5-Difluoro-2,4-dinitrobenzene	C1=C(C(=CC(=C1[N+](=O)[O-])F)F)[N+](=O)[O-]	2.08	pIGC50	TP	Zhu et al., 2008
1542	1,3-Dinitro-2,4,5-trichlorobenzene	C1=C(C(=C(C(=C1Cl)Cl)[N+](=O)[O-])Cl)[N+](=O)[O-]	2.6	pIGC50	TP	Zhu et al., 2008
1543	1,3,5-Trichloro-2,4-dinitrobenzene hemihydrate	C1=C(C(=C(C(=C1Cl)[N+](=O)[O-])Cl)[N+](=O)[O-])Cl	2.19	pIGC50	TP	Zhu et al., 2008
1544	4-Chloro-3,5-dinitrobenzonitrile	C1=C(C=C(C(=C1[N+](=O)[O-])Cl)[N+](=O)[O-])C#N	2.66	pIGC50	TP	Zhu et al., 2008
1545	4-Methylbenzyl alcohol	CC1=CC=C(C=C1)CO	-0.49	pIGC50	TP	Zhu et al., 2008
1546	(±)-1-Phenyl-2-pentanol	CCCC(CC1=CC=CC=C1)O	0.16	pIGC50	TP	Zhu et al., 2008
1547	2-(4-tolyl)ethylamine	CC1=CC=C(C=C1)CCN	-0.04	pIGC50	TP	Zhu et al., 2008
1548	4-Methyl benzylamine	CC1=CC=C(C=C1)CN	-0.01	pIGC50	TP	Zhu et al., 2008
1549	3-Phenyl-2-propen-1-ol	C1=CC=C(C=C1)C=CCO	-0.08	pIGC50	TP	Zhu et al., 2008
1550	4-(Tert)butylbenzyl alcohol	CC(C)(C)C1=CC=C(C=C1)CO	0.48	pIGC50	TP	Zhu et al., 2008
1551	4-Methylphenethyl alcohol	CC1=CC=C(C=C1)CCO	-0.26	pIGC50	TP	Zhu et al., 2008
1552	2-Methylbenzyl alcohol	CC1=CC=CC=C1CO	-0.43	pIGC50	TP	Zhu et al., 2008
1553	(±)1-Phenyl-1-propanol	CCC(C1=CC=CC=C1)O	-0.43	pIGC50	TP	Zhu et al., 2008
1554	2-Phenyl-1-propanol	CC(CO)C1=CC=CC=C1	-0.4	pIGC50	TP	Zhu et al., 2008
1555	2-Phenyl-2-propanol	CC(C)(C1=CC=CC=C1)O	-0.57	pIGC50	TP	Zhu et al., 2008
1556	Benzhydrol	C1=CC=C(C=C1)C(C2=CC=CC=C2)O	0.5	pIGC50	TP	Zhu et al., 2008
1557	Benzaldoxime	C1=CC=C(C=C1)C=NO	-0.11	pIGC50	TP	Zhu et al., 2008
1558	4-(Tert)butylaniline	CC(C)(C)C1=CC=C(C=C1)N	0.36	pIGC50	TP	Zhu et al., 2008
1559	2,4-Dimethylaniline	CC1=CC(=C(C=C1)N)C	-0.29	pIGC50	TP	Zhu et al., 2008
1560	4-(Sec)-butylaniline	CCC(C)C1=CC=C(C=C1)N	0.61	pIGC50	TP	Zhu et al., 2008
1561	2,3-Dimethylaniline	CC1=C(C(=CC=C1)N)C	-0.43	pIGC50	TP	Zhu et al., 2008
1562	Benzyl Cyanide	C1=CC=C(C=C1)CC#N	-0.36	pIGC50	TP	Zhu et al., 2008
1563	a-Methylbenzyl Cyanide	CC(C#N)C1=CC=CC=C1	0.01	pIGC50	TP	Zhu et al., 2008
1564	n-Ethylaniline	CCNC1=CC=CC=C1	0.07	pIGC50	TP	Zhu et al., 2008
1565	n-Methylaniline	CNC1=CC=CC=C1	0.06	pIGC50	TP	Zhu et al., 2008
1566	2-Amino-4-(tert)butylphenol	CC(C)(C)C1=CC(=C(C=C1)O)N	0.37	pIGC50	TP	Zhu et al., 2008
1567	2-Methoxyaniline	COC1=CC=CC=C1N	-0.69	pIGC50	TP	Zhu et al., 2008
1568	3-Phenylpyridine	C1=CC=C(C=C1)C2=CN=CC=C2	0.47	pIGC50	TP	Zhu et al., 2008
1569	2-Aminobenzyl alcohol	C1=CC=C(C(=C1)CO)N	-1.07	pIGC50	TP	Zhu et al., 2008
1570	2-Benzylpyridine	C1=CC=C(C=C1)CC2=CC=CC=N2	0.38	pIGC50	TP	Zhu et al., 2008
1571	4-Benzylpyridine	C1=CC=C(C=C1)CC2=CC=NC=C2	0.63	pIGC50	TP	Zhu et al., 2008
1572	3,4-Dimethylphenol	CC1=C(C=C(C=C1)O)C	0.12	pIGC50	TP	Zhu et al., 2008
1573	3-(Tert)butylphenol	CC(C)(C)C1=CC(=CC=C1)O	0.74	pIGC50	TP	Zhu et al., 2008
1574	6-(Tert)butyl-2,4-dimethylphenol	CC1=CC(=C(C(=C1)C(C)(C)C)O)C	1.16	pIGC50	TP	Zhu et al., 2008
1575	4-Isopropylphenol	CC(C)C1=CC=C(C=C1)O	0.47	pIGC50	TP	Zhu et al., 2008
1576	3-Isopropylphenol	CC(C)C1=CC(=CC=C1)O	0.61	pIGC50	TP	Zhu et al., 2008
1577	2,3-Dimethylphenol	CC1=C(C(=CC=C1)O)C	0.12	pIGC50	TP	Zhu et al., 2008
1578	2-Isopropylphenol	CC(C)C1=CC=CC=C1O	0.61	pIGC50	TP	Zhu et al., 2008
1579	2,4,6-Tris(dimethylaminomethyl)phenol	CN(C)CC1=CC(=C(C(=C1)CN(C)C)O)CN(C)C	-0.52	pIGC50	TP	Zhu et al., 2008
1580	2-Fluoroaniline	C1=CC=C(C(=C1)N)F	-0.37	pIGC50	TP	Zhu et al., 2008
1581	4-Aminobenzyl Cyanide	C1=CC(=CC=C1CC#N)N	-0.76	pIGC50	TP	Zhu et al., 2008
1582	Cinnamonitrile	C1=CC=C(C=C1)C=CC#N	0.16	pIGC50	TP	Zhu et al., 2008
1583	3-Fluorobenzyl alcohol	C1=CC(=CC(=C1)F)CO	-0.39	pIGC50	TP	Zhu et al., 2008
1584	3-Cyanoaniline	C1=CC(=CC(=C1)N)C#N	-0.47	pIGC50	TP	Zhu et al., 2008
1585	3-Fluoroaniline	C1=CC(=CC(=C1)F)N	-0.1	pIGC50	TP	Zhu et al., 2008
1586	4-Chloro-3-ethylphenol	CCC1=C(C=CC(=C1)O)Cl	1.08	pIGC50	TP	Zhu et al., 2008
1587	2-Chloro-4,5-dimethylphenol	CC1=CC(=C(C=C1C)Cl)O	0.69	pIGC50	TP	Zhu et al., 2008
1588	3,5-Dimethoxyphenol	COC1=CC(=CC(=C1)O)OC	-0.09	pIGC50	TP	Zhu et al., 2008
1589	4-Hydroxybenzyl Cyanide	C1=CC(=CC=C1CC#N)O	-0.38	pIGC50	TP	Zhu et al., 2008
1590	4-Bromo-2,6-dimethylphenol	CC1=CC(=CC(=C1O)C)Br	1.16	pIGC50	TP	Zhu et al., 2008
1591	2-Chloro-5-methylphenol	CC1=CC(=C(C=C1)Cl)O	0.54	pIGC50	TP	Zhu et al., 2008
1592	4-Bromophenol	C1=CC(=CC=C1O)Br	0.68	pIGC50	TP	Zhu et al., 2008
1593	4-Chlorophenethyl alcohol	C1=CC(=CC=C1CCO)Cl	0.32	pIGC50	TP	Zhu et al., 2008
1594	4-Chlorobenzyl alcohol	C1=CC(=CC=C1CO)Cl	0.25	pIGC50	TP	Zhu et al., 2008
1595	1,3,5-Trimethyl-2-nitrobenzene	CC1=CC(=C(C(=C1)C)[N+](=O)[O-])C	0.86	pIGC50	TP	Zhu et al., 2008
1596	3-Chlorobenzyl alcohol	C1=CC(=CC(=C1)Cl)CO	0.15	pIGC50	TP	Zhu et al., 2008
1597	2-Bromophenol	C1=CC=C(C(=C1)O)Br	0.33	pIGC50	TP	Zhu et al., 2008
1598	4-Hydroxy-3-methoxybenzonitrile	COC1=C(C=CC(=C1)C#N)O	-0.03	pIGC50	TP	Zhu et al., 2008
1599	3-Nitrobenzyl alcohol	C1=CC(=CC(=C1)[N+](=O)[O-])CO	-0.22	pIGC50	TP	Zhu et al., 2008
1600	4-Methoxybenzonitrile	COC1=CC=C(C=C1)C#N	0.1	pIGC50	TP	Zhu et al., 2008
1601	2-Hydroxy-4,5-dimethylacetophenone	CC1=C(C=C(C(=C1)C(=O)C)O)C	0.71	pIGC50	TP	Zhu et al., 2008
1602	2-Anisaldehyde	COC1=CC=CC=C1C=O	0.15	pIGC50	TP	Zhu et al., 2008
1603	Methyl-4-methylaminobenzoate	CNC1=CC=C(C=C1)C(=O)OC	0.31	pIGC50	TP	Zhu et al., 2008
1604	4-Phenoxybenzaldehyde	C1=CC=C(C=C1)OC2=CC=C(C=C2)C=O	1.26	pIGC50	TP	Zhu et al., 2008
1605	2,4,5-Trimethoxybenzaldehyde	COC1=CC(=C(C=C1C=O)OC)OC	-0.1	pIGC50	TP	Zhu et al., 2008
1606	4-Benzoylaniline	C1=CC=C(C=C1)C(=O)C2=CC=C(C=C2)N	0.68	pIGC50	TP	Zhu et al., 2008
1607	n-Propyl Cinnamate	CCCOC(=O)C=CC1=CC=CC=C1	1.23	pIGC50	TP	Zhu et al., 2008
1608	(Trans)ethyl Cinnamate	CCOC(=O)C=CC1=CC=CC=C1	0.99	pIGC50	TP	Zhu et al., 2008
1609	Hexanophenone	CCCCCC(=O)C1=CC=CC=C1	1.19	pIGC50	TP	Zhu et al., 2008
1610	n-Butyl Cinnamate	CCCCOC(=O)C=CC1=CC=CC=C1	1.53	pIGC50	TP	Zhu et al., 2008
1611	4-Chlorobenzyl Cyanide	C1=CC(=CC=C1CC#N)Cl	0.66	pIGC50	TP	Zhu et al., 2008
1612	(Trans)methyl Cinnamate	COC(=O)C=CC1=CC=CC=C1	0.58	pIGC50	TP	Zhu et al., 2008
1613	Ethyl-4-methoxybenzoate	CCOC(=O)C1=CC=C(C=C1)OC	0.77	pIGC50	TP	Zhu et al., 2008
1614	Phenylacetic acid hydrazide	C1=CC=C(C=C1)CC(=O)NN	-0.48	pIGC50	TP	Zhu et al., 2008
1615	2,6-Dichlorophenol	C1=CC(=C(C(=C1)Cl)O)Cl	0.73	pIGC50	TP	Zhu et al., 2008
1616	Isoamyl-4-hydroxybenzoate	CC(C)CCOC(=O)C1=CC=C(C=C1)O	1.48	pIGC50	TP	Zhu et al., 2008
1617	Benzyl-4-hydroxyphenyl ketone	C1=CC=C(C=C1)CC(=O)C2=CC=C(C=C2)O	1.07	pIGC50	TP	Zhu et al., 2008
1618	Benzyl benzoate	C1=CC=C(C=C1)COC(=O)C2=CC=CC=C2	1.45	pIGC50	TP	Zhu et al., 2008
1619	4-Benzoylphenol	C1=CC=C(C=C1)C(=O)C2=CC=C(C=C2)O	1.02	pIGC50	TP	Zhu et al., 2008
1620	2-Methyl-5-nitrophenol	CC1=C(C=C(C=C1)[N+](=O)[O-])O	0.66	pIGC50	TP	Zhu et al., 2008
1621	5-Chloro-2-hydroxybenzamide	C1=CC(=C(C=C1Cl)C(=O)N)O	0.59	pIGC50	TP	Zhu et al., 2008
1622	3-Nitrophenol	C1=CC(=CC(=C1)O)[N+](=O)[O-]	0.51	pIGC50	TP	Zhu et al., 2008
1623	Phenyl-1,3-dialdehyde	C1=CC(=CC(=C1)C=O)C=O	0.18	pIGC50	TP	Zhu et al., 2008
1624	2,4-Dihydroxyacetophenone	CC(=O)C1=C(C=C(C=C1)O)O	0.25	pIGC50	TP	Zhu et al., 2008
1625	3-Chlorobenzophenone	C1=CC=C(C=C1)C(=O)C2=CC(=CC=C2)Cl	1.55	pIGC50	TP	Zhu et al., 2008
1626	Phenyl benzoate	C1ccccc1C(=O)Oc2ccccc2	1.35	pIGC50	TP	Zhu et al., 2008
1627	Benzylidene malononitrile	C1=CC=C(C=C1)C=C(C#N)C#N	0.64	pIGC50	TP	Zhu et al., 2008
1628	4-Nitrophenyl phenyl ether	C1=CC=C(C=C1)OC2=CC=C(C=C2)[N+](=O)[O-]	1.58	pIGC50	TP	Zhu et al., 2008
1629	Ethyl phenylcyanoacetate	CCOC(=O)C(C#N)C1=CC=CC=C1	-0.02	pIGC50	TP	Zhu et al., 2008
1630	2-Nitroanisole	COC1=CC=CC=C1[N+](=O)[O-]	-0.07	pIGC50	TP	Zhu et al., 2008
1631	3-Methyl-2-nitrophenol	CC1=C(C(=CC=C1)O)[N+](=O)[O-]	0.61	pIGC50	TP	Zhu et al., 2008
1632	2-Nitrobenzamide	C1=CC=C(C(=C1)C(=O)N)[N+](=O)[O-]	-0.72	pIGC50	TP	Zhu et al., 2008
1633	2-Nitrobenzaldehyde	C1=CC=C(C(=C1)C=O)[N+](=O)[O-]	0.17	pIGC50	TP	Zhu et al., 2008
1634	4-Methyl-2-nitrophenol	CC1=CC(=C(C=C1)O)[N+](=O)[O-]	0.57	pIGC50	TP	Zhu et al., 2008
1635	2,2',4,4'-Tetrahydroxybenzophenone	C1=CC(=C(C=C1O)O)C(=O)C2=C(C=C(C=C2)O)O	0.96	pIGC50	TP	Zhu et al., 2008
1636	4-Nitrobenzaldehyde	C1=CC(=CC=C1C=O)[N+](=O)[O-]	0.2	pIGC50	TP	Zhu et al., 2008
1637	5-Methyl-2-nitrophenol	CC1=CC(=C(C=C1)[N+](=O)[O-])O	0.59	pIGC50	TP	Zhu et al., 2008
1638	3,5-Dichlorosalicylaldehyde	C1=C(C=C(C(=C1Cl)O)C=O)Cl	1.55	pIGC50	TP	Zhu et al., 2008
1639	2-(Benzylthio)-3-nitropyridine	C1=CC=CC=C1CSC2=C([N+](=O)[O-])C=CC=N2	1.72	pIGC50	TP	Zhu et al., 2008
1640	Ethyl-4-nitrobenzoate	CCOC(=O)C1=CC=C(C=C1)[N+](=O)[O-]	0.71	pIGC50	TP	Zhu et al., 2008
1641	2,4-Dichlorobenzaldehyde	C1=CC(=C(C=C1Cl)Cl)C=O	1.04	pIGC50	TP	Zhu et al., 2008
1642	a,a,a-Trifluoro-4-cresol	C1=CC(=CC=C1C(F)(F)F)O	0.62	pIGC50	TP	Zhu et al., 2008
1643	Thioacetanilide	CC(=S)NC1=CC=CC=C1	-0.01	pIGC50	TP	Zhu et al., 2008
1644	Pentafluorobenzyl alcohol	C(C1=C(C(=C(C(=C1F)F)F)F)F)O	-0.2	pIGC50	TP	Zhu et al., 2008
1645	a,a,a-4-Tetrafluoro-o-toluidine	C1=CC(=C(C=C1F)C(F)(F)F)N	-0.02	pIGC50	TP	Zhu et al., 2008
1646	2,5-Dibromonitrobenzene	C1=CC(=C(C=C1Br)[N+](=O)[O-])Br	1.37	pIGC50	TP	Zhu et al., 2008
1647	Benzoyl Cyanide	C1=CC=C(C=C1)C(=O)C#N	0.31	pIGC50	TP	Zhu et al., 2008
1648	2,5-Difluoronitrobenzene	C1=CC(=C(C=C1F)[N+](=O)[O-])F	0.33	pIGC50	TP	Zhu et al., 2008
1649	2,4-Dibromo-6-nitroaniline	C1=C(C=C(C(=C1Br)N)[N+](=O)[O-])Br	1.62	pIGC50	TP	Zhu et al., 2008
1650	4-Hydroxy-3-nitrobenzaldehyde	C1=CC(=C(C=C1C=O)[N+](=O)[O-])O	0.61	pIGC50	TP	Zhu et al., 2008
1651	Benzoyl isothiocyanate	C1=CC=C(C=C1)C(=O)N=C=S	0.1	pIGC50	TP	Zhu et al., 2008
1652	Methanol (ACGIH)	CO	-2.67	pIGC50	TP	Zhu et al., 2008
1653	Ethanol (ACGIH:OSHA)	C(C)O	-1.99	pIGC50	TP	Zhu et al., 2008
1654	(+/-)-2-Butanol	CC(CC)O	-1.54	pIGC50	TP	Zhu et al., 2008
1655	Pentyl alcohol (mixed isomers)	C(CCCC)O	-1.03	pIGC50	TP	Zhu et al., 2008
1656	2-pentanol	CC(O)CCC	-1.16	pIGC50	TP	Zhu et al., 2008
1657	sec-Pentanol	CCC(CC)O	-1.24	pIGC50	TP	Zhu et al., 2008
1658	2-Butanol,3-methyl- (8CI9CI)	CC(C(C)C)O	-1	pIGC50	TP	Zhu et al., 2008
1659	1-Butanol,2-methyl-	C(C(CC)C)O	-0.95	pIGC50	TP	Zhu et al., 2008
1660	tert-Butylcarbinol	C(C(C)(C)C)O	-0.87	pIGC50	TP	Zhu et al., 2008
1661	2-Butoxyethanol (ACGIH:OSHA)	C(CO)OCCCC	-1.37	pIGC50	TP	Zhu et al., 2008
1662	hexanol,1-	C(CCCCC)O	-0.38	pIGC50	TP	Zhu et al., 2008
1663	1-Butanol,3,3-dimethyl-	OCCC(C)(C)C	-0.74	pIGC50	TP	Zhu et al., 2008
1664	3-Pentanol,2,4-dimethyl-	CC(C(C(C)C)O)C	-0.71	pIGC50	TP	Zhu et al., 2008
1665	1-Hydroxyoctane	C(CCCCCCC)O	0.58	pIGC50	TP	Zhu et al., 2008
1666	(+/-)-2-Octanol	CC(CCCCCC)O	0	pIGC50	TP	Zhu et al., 2008
1667	(+-)-3-octanol	CCC(CCCCC)O	0.03	pIGC50	TP	Zhu et al., 2008
1668	2-Ethyl-l-hexanol	C(C(CCCC)CC)O	0.17	pIGC50	TP	Zhu et al., 2008
1669	Nonyl alcohol (8CI)	C(CCCCCCCC)O	0.84	pIGC50	TP	Zhu et al., 2008
1670	NONAN-2-OL	CC(CCCCCCC)O	0.62	pIGC50	TP	Zhu et al., 2008
1671	3-ETHYL-2,2-DIMETHYL-3-PENTANol	C(C(C)(C)C)(CC)(CC)O	-0.17	pIGC50	TP	Zhu et al., 2008
1672	n-Undecanol	C(CCCCCO)CCCCC	1.95	pIGC50	TP	Zhu et al., 2008
1673	CO-1214	C(CCCCCCCCCCC)O	2.16	pIGC50	TP	Zhu et al., 2008
1674	NCINSC#54711	C1(CCCCC1)O	-0.77	pIGC50	TP	Zhu et al., 2008
1675	1,2-Pentanediol (8CI9CI)	OCC(CCC)O	-1.63	pIGC50	TP	Zhu et al., 2008
1676	a,o-Pentanediol	C(CCCCO)O	-1.93	pIGC50	TP	Zhu et al., 2008
1677	2,4-Pentanediol,2-methyl-	OC(C)CC(C)(C)O	-1.95	pIGC50	TP	Zhu et al., 2008
1678	DL-Butylethylenglykol	CCCCC(O)CO	-1.27	pIGC50	TP	Zhu et al., 2008
1679	1,6-Hexanediol (8CI9CI)	C(CCCCCO)O	-1.49	pIGC50	TP	Zhu et al., 2008
1680	WLN: QY1&2YQ1	C(CC(C)O)C(C)O	-1.96	pIGC50	TP	Zhu et al., 2008
1681	1,2-Decanediol (8CI9CI)	C(CCCCCC)CC(CO)O	0.76	pIGC50	TP	Zhu et al., 2008
1682	1,10-Decamethylenediol	C(CCCCCCCCCO)O	0.22	pIGC50	TP	Zhu et al., 2008
1683	Vinylethyl alcohol	C=CCCO	-1.7	pIGC50	TP	Zhu et al., 2008
1684	3-methyl-3-buten-1-ol	OCCC(C)=C	-1.18	pIGC50	TP	Zhu et al., 2008
1685	1-Buten-3-ol,3-methyl-	C=CC(C)(C)O	-1.39	pIGC50	TP	Zhu et al., 2008
1686	4-Pentenyl alcohol	OCCCC=C	-1.22	pIGC50	TP	Zhu et al., 2008
1687	1-Penten-4-ol	C=CCC(C)O	-1.52	pIGC50	TP	Zhu et al., 2008
1688	4-Pentyl-1-ol	C#CCCCO	-1.42	pIGC50	TP	Zhu et al., 2008
1689	3-Butyn-2-ol,2-methyl-	CC(C#C)(O)C	-1.31	pIGC50	TP	Zhu et al., 2008
1690	trans-3-Hexen-1-ol	CCC=CCCO	-0.78	pIGC50	TP	Zhu et al., 2008
1691	5-Hexyn-1-Ol,96%	C#CCCCCO	-1.29	pIGC50	TP	Zhu et al., 2008
1692	1-Pentyn-3-ol,3-methyl-	OC(C)(C#C)CC	-1.32	pIGC50	TP	Zhu et al., 2008
1693	4-methyl-2-heptyn-4-ol	OC(CCC)(C)C#CC	-0.43	pIGC50	TP	Zhu et al., 2008
1694	4-Hexen-1-ol	C(O)CCC=CC	-0.75	pIGC50	TP	Zhu et al., 2008
1695	6-hydroxy-1-hexene	C=CCCCCO	-0.84	pIGC50	TP	Zhu et al., 2008
1696	3-Hexyn-1-ol	CCC#CCCO	-1.02	pIGC50	TP	Zhu et al., 2008
1697	3-Heptyn-1-ol	CCCC#CCCO	-0.32	pIGC50	TP	Zhu et al., 2008
1698	5-Nonyn-3-ol	CCC(O)CC#CCCC	-0.04	pIGC50	TP	Zhu et al., 2008
1699	2-Hydroxyethyl-n-hexylacetylene	CCCCCCC#CCCO	1.13	pIGC50	TP	Zhu et al., 2008
1700	WLN:Q2U1	C(C=C)O	-1.92	pIGC50	TP	Zhu et al., 2008
1701	2-Propen-1-ol,2-methyl-	C(CO)(C)=C	-1.66	pIGC50	TP	Zhu et al., 2008
1702	2-Methyl-2-propenol	C=CC(C)O	-1.05	pIGC50	TP	Zhu et al., 2008
1703	cis-2-Buten-1,4-diol with G.C..gamma.,.gamma.-Dimethylallyl	C(O)C=CCO	-2.15	pIGC50	TP	Zhu et al., 2008
1704	alcohol	C(C)(=CCO)C	-1.24	pIGC50	TP	Zhu et al., 2008
1705	Cis-2-pentenol	C(=CCO)CC	-1.11	pIGC50	TP	Zhu et al., 2008
1706	Methyl-propenylcarbinol	CC=CC(C)O	-1.4	pIGC50	TP	Zhu et al., 2008
1707	1-Pentene-3-ol	C(CC)(C=C)O	-1.35	pIGC50	TP	Zhu et al., 2008
1708	3-Hydroxy-1-hexene	C=CC(CCC)O	-0.81	pIGC50	TP	Zhu et al., 2008
1709	2-NONEN-1-ol	C(O)C=CCCCCCC	0.77	pIGC50	TP	Zhu et al., 2008
1710	2-Undecen-1-ol,(2E)- (9CI)	CCCCCCCCC=CCO	1.61	pIGC50	TP	Zhu et al., 2008
1711	trans-2-Dodecenol	C(O)C=CCCCCCCCCC	2.09	pIGC50	TP	Zhu et al., 2008
1712	Metile (acetato di) (ITALIAN)	C(C)(=O)OC	-1.6	pIGC50	TP	Zhu et al., 2008
1713	Propyl ethanoate	C(C)(=O)OCCC	-1.24	pIGC50	TP	Zhu et al., 2008
1714	Isopropylacetaat(DUTCH)	C(C)(=O)OC(C)C	-1.59	pIGC50	TP	Zhu et al., 2008
1715	Acetic acid,sec-butyl ester	C(C)(=O)OC(CC)C	-0.68	pIGC50	TP	Zhu et al., 2008
1716	WLN:5OV1	C(C)(=O)OCCCCC	0.16	pIGC50	TP	Zhu et al., 2008
1717	2-ethylbutyl acetate	CCC(CC)COC(=O)C	-0.12	pIGC50	TP	Zhu et al., 2008
1718	WLN:8OV1	C(C)(=O)OCCCCCCCC	1.06	pIGC50	TP	Zhu et al., 2008
1719	Propionic acid,butyl ester	C(CC)(=O)OCCCC	0.17	pIGC50	TP	Zhu et al., 2008
1720	Propionic acid,isobutyl ester	C(CC)(=O)OCC(C)C	-0.69	pIGC50	TP	Zhu et al., 2008
1721	Propionic acid,propyl ester	C(CC)(=O)OCCC	-0.81	pIGC50	TP	Zhu et al., 2008
1722	Propanoic acid,tert-Butyl ester	CCC(OC(C)(C)C)=O	-0.41	pIGC50	TP	Zhu et al., 2008
1723	Butyric ester	C(CCC)(=O)OCC	-0.49	pIGC50	TP	Zhu et al., 2008
1724	Ethyl .alpha.-methylbutyrate	CCC(C(OCC)=O)C	-0.89	pIGC50	TP	Zhu et al., 2008
1725	Pentanoic acid,ethyl ester (9CI)	CCCCC(OCC)=O	-0.36	pIGC50	TP	Zhu et al., 2008
1726	Butyric acid,3-methyl-,ethyl ester (6CI,7CI,8CI)	C(CC(C)C)(=O)OCC	-0.72	pIGC50	TP	Zhu et al., 2008
1727	Butyric acid,propyl ester	C(CCC)(=O)OCCC	-0.41	pIGC50	TP	Zhu et al., 2008
1728	Butyric acid,butyl ester	C(CCC)(=O)OCCCC	0.52	pIGC50	TP	Zhu et al., 2008
1729	Pentyl propanoate	O(C(CC)=O)CCCCC	-0.04	pIGC50	TP	Zhu et al., 2008
1730	Isobutyric acid,isobutyl ester	C(C(C)C)(=O)OCC(C)C	-0.59	pIGC50	TP	Zhu et al., 2008
1731	Ethyl hexoate	C(CCCCC)(=O)OCC	0.06	pIGC50	TP	Zhu et al., 2008
1732	Propionic acid,methyl ester	C(CC)(=O)OC	-1.61	pIGC50	TP	Zhu et al., 2008
1733	Butyric acid,methyl ester	C(CCC)(=O)OC	-1.25	pIGC50	TP	Zhu et al., 2008
1734	Valeric acid,methyl ester	CCCCC(=O)OC	-0.84	pIGC50	TP	Zhu et al., 2008
1735	Butanoic acid,2-methyl-,methyl ester,(+-)-	O=C(C(CC)C)OC	-1.17	pIGC50	TP	Zhu et al., 2008
1736	Methyl hexoate	CCCCCC(OC)=O	-0.56	pIGC50	TP	Zhu et al., 2008
1737	Heptanoic acid,methyl ester	CCCCCCC(OC)=O	0.1	pIGC50	TP	Zhu et al., 2008
1738	Octanoic acid,methyl ester(8CI9CI)	CCCCCCCC(OC)=O	0.54	pIGC50	TP	Zhu et al., 2008
1739	Methyl nonylate	CCCCCCCCC(=O)OC	1.04	pIGC50	TP	Zhu et al., 2008
1740	Decanoic acid,methyl ester	CCCCCCCCCC(OC)=O	1.38	pIGC50	TP	Zhu et al., 2008
1741	Methyl n-undecanoate	O(C)C(=O)CCCCCCCCCC	1.42	pIGC50	TP	Zhu et al., 2008
1742	Methylester kyseliny mravenci(Czech)	C(=O)OC	-1.5	pIGC50	TP	Zhu et al., 2008
1743	Butylester kyseliny mravenci (Czech)	C(CCC)OC=O	-0.93	pIGC50	TP	Zhu et al., 2008
1744	butyl formate,t-	O=COC(C)(C)C	-1.37	pIGC50	TP	Zhu et al., 2008
1745	Formic acid,pentyl ester	C(COC=O)CCC	-0.78	pIGC50	TP	Zhu et al., 2008
1746	Propanoic acid,2-propenyl ester (9CI)	O(C(CC)=O)CC=C	-0.88	pIGC50	TP	Zhu et al., 2008
1747	Allylester kyseliny enanthove (Czech)	C(CCCCCC)(OCC=C)=O	0.73	pIGC50	TP	Zhu et al., 2008
1748	Acetic acid,isopropenyl ester	O(C(=C)C)C(=O)C	-0.49	pIGC50	TP	Zhu et al., 2008
1749	Ethenyl ethanoate	C(C)(=O)OC=C	-0.86	pIGC50	TP	Zhu et al., 2008
1750	Hexanoic acid,2-ethyl-,vinyl ester	C(C(OC=C)=O)(CCCC)CC	1.05	pIGC50	TP	Zhu et al., 2008
1751	Propionic acid propargyl ester	C(CC)(=O)OCC#C	-0.66	pIGC50	TP	Zhu et al., 2008
1752	Vinyl propanoate	C(OC=C)(CC)=O	-0.65	pIGC50	TP	Zhu et al., 2008
1753	Butyric acid,vinyl ester	C(CCC)(OC=C)=O	-0.38	pIGC50	TP	Zhu et al., 2008
1754	Acetic acid 2-butynyl ester	C(#CC)COC(=O)C	-0.88	pIGC50	TP	Zhu et al., 2008
1755	2-Butanone,3-methyl-	CC(C(C)C)=O	-1.17	pIGC50	TP	Zhu et al., 2008
1756	4-Methyl-2-pentanon (Czech)	CC(CC(C)C)=O	-1.21	pIGC50	TP	Zhu et al., 2008
1757	Cyclohexanone (8CI9CI)	C1(CCCCC1)=O	-1.23	pIGC50	TP	Zhu et al., 2008
1758	2-Butanone,3,3-dimethyl-	CC(C(C)(C)C)=O	-1.44	pIGC50	TP	Zhu et al., 2008
1759	Butylacetone	CC(CCCCC)=O	-0.49	pIGC50	TP	Zhu et al., 2008
1760	Dipropyl ketone (ACGIH)	CCCC(CCC)=O	-0.67	pIGC50	TP	Zhu et al., 2008
1761	2-Oxooctane	CC(CCCCCC)=O	-0.15	pIGC50	TP	Zhu et al., 2008
1762	5-Nonanone (8CI9CI)	CCCCC(CCCC)=O	0.07	pIGC50	TP	Zhu et al., 2008
1763	Octyl methyl ketone	CC(CCCCCCCC)=O	0.58	pIGC50	TP	Zhu et al., 2008
1764	3-Decanone	CCC(=O)CCCCCCC	0.63	pIGC50	TP	Zhu et al., 2008
1765	MGK Dog and Cat Repellent	CC(CCCCCCCCC)=O	1.53	pIGC50	TP	Zhu et al., 2008
1766	Methyl n-Decyl Ketone	CC(CCCCCCCCCC)=O	1.67	pIGC50	TP	Zhu et al., 2008
1767	Hexyl ketone	C(CCCCCC)(CCCCCC)=O	1.52	pIGC50	TP	Zhu et al., 2008
1768	5-Hexen-2-one (8CI9CI)	O=C(C)CCC=C	-1.14	pIGC50	TP	Zhu et al., 2008
1769	5-Hexen-2-one,5-methyl-(8CI9CI)	C(CC(C)=C)C(C)=O	-0.87	pIGC50	TP	Zhu et al., 2008
1770	5-Hepten-2-one,6-methyl-	CC(=CCCC(C)=O)C	-0.45	pIGC50	TP	Zhu et al., 2008
1771	Propannitril (Czech)	C(C)C#N	-1.97	pIGC50	TP	Zhu et al., 2008
1772	Butanenitrile (9CI)	C(CCC)#N	-1.44	pIGC50	TP	Zhu et al., 2008
1773	Pentanonitrile	C(CCC)C#N	-1.01	pIGC50	TP	Zhu et al., 2008
1774	2-Methylbutane secondary mononitrile	C(CC#N)(C)C	-0.88	pIGC50	TP	Zhu et al., 2008
1775	WLN:NC5	C(CCCCC)#N	-0.38	pIGC50	TP	Zhu et al., 2008
1776	Valeronitrile,4-methyl-	C(CCC(C)C)#N	-0.79	pIGC50	TP	Zhu et al., 2008
1777	1-Octyl Cyanide	C(CCCCC)CCC#N	0.62	pIGC50	TP	Zhu et al., 2008
1778	Undecanonitrile	C(CCCCCC)CCCC#N	1.65	pIGC50	TP	Zhu et al., 2008
1779	Butane,1-bromo-	C(CCC)Br	-0.18	pIGC50	TP	Zhu et al., 2008
1780	Pentane,1-bromo- (8CI9CI)	C(CCCC)Br	0.48	pIGC50	TP	Zhu et al., 2008
1781	octylbromide,n-	C(CCCCCCC)Br	1.87	pIGC50	TP	Zhu et al., 2008
1782	1,2-Dibromohexane	C(Br)C(Br)CCCC	1.15	pIGC50	TP	Zhu et al., 2008
1783	Hexane,1,6-dibromo-	C(CCCCCBr)Br	1.05	pIGC50	TP	Zhu et al., 2008
1784	3,4-Dibromohexane	CCC(C(CC)Br)Br	1	pIGC50	TP	Zhu et al., 2008
1785	Propane,1,1'-thiobis- (9CI)	S(CCC)CCC	0	pIGC50	TP	Zhu et al., 2008
1786	5-Thianonane	S(CCCC)CCCC	1.04	pIGC50	TP	Zhu et al., 2008
1787	1-Heptylthiol	CCCCCCCS	1.02	pIGC50	TP	Zhu et al., 2008
1788	Cyklohexylmerkaptan (CZECH)	SC1CCCCC1	0	pIGC50	TP	Zhu et al., 2008
1789	Sulfinylbis(methane)	S(=O)(C)C	-2.45	pIGC50	TP	Zhu et al., 2008
1790	n-Butyl sulphoxide	CCCCS(=O)CCCC	-0.26	pIGC50	TP	Zhu et al., 2008
1791	Di-n-propyl sulphite	O(S(=O)OCCC)CCC	0.09	pIGC50	TP	Zhu et al., 2008
1792	Diethylester kyseliny sirove (Czech)	S(=O)(=O)(OCC)OCC	-0.7	pIGC50	TP	Zhu et al., 2008
1793	n-Butyl sulphate	O=S(=O)(OCCCC)OCCCC	0.62	pIGC50	TP	Zhu et al., 2008
1794	beta-Isonitrosopropane	CC(C)=NO	-1.25	pIGC50	TP	Zhu et al., 2008
1795	2-HEPTANONE OXIME	C(CCCCC)(=NO)C	0.1	pIGC50	TP	Zhu et al., 2008
1796	Methylcarbamate	C(N)(=O)OC	-1.97	pIGC50	TP	Zhu et al., 2008
1797	Urethane [Ethylcarbamate]	C(N)(=O)OCC	-1.65	pIGC50	TP	Zhu et al., 2008
1798	Carbamic acid,butyl ester	C(OC(N)=O)CCC	-0.97	pIGC50	TP	Zhu et al., 2008
1799	Sebacic acid,diethyl ester	C(CCCCCCCC(OCC)=O)C(OCC)=O	1.35	pIGC50	TP	Zhu et al., 2008
1800	SUBERIC ACID DIETHYL ESTER	O(C(CCCCCCC(OCC)=O)=O)CC	0.7	pIGC50	TP	Zhu et al., 2008
1801	Diethylester kyseliny jantarove (Czech)	O(C(CCC(OCC)=O)=O)CC	-0.85	pIGC50	TP	Zhu et al., 2008
1802	Propanedioic acid,dimethyl ester (9CI)	C(CC(=O)OC)(=O)OC	-1.29	pIGC50	TP	Zhu et al., 2008
1803	Polycizer W 260	O(C(CCCCC(OCCCC)=O)=O)CCCC	0.79	pIGC50	TP	Zhu et al., 2008
1804	DIMETHYL TRIDECANEDIOATE	O(C(CCCCCCCCCCCC(OC)=O)=O)C	1.65	pIGC50	TP	Zhu et al., 2008
1805	SUBERIC ACID DIMETHYL ESTER	O(C(CCCCCCC(OC)=O)=O)C	0.3	pIGC50	TP	Zhu et al., 2008
1806	Glutaric acid,dimethyl ester (8CI)	COC(CCCC(OC)=O)=O	-1.17	pIGC50	TP	Zhu et al., 2008
1807	Butylmalonic acid diethyl ester	C(C(C(OCC)=O)C(OCC)=O)CCC	0.56	pIGC50	TP	Zhu et al., 2008
1808	Diethyl 2-ethylmalonate	C(C(C(OCC)=O)C(OCC)=O)C	-0.24	pIGC50	TP	Zhu et al., 2008
1809	3-Oxopimelinsaeurediethylester	CCOC(=O)C(C)(C)C(=O)CC(=O)OCC	-0.38	pIGC50	TP	Zhu et al., 2008
1810	Diethyl-gamma-oxopimelate	C(CCC(OCC)=O)(CCC(OCC)=O)=O	-0.64	pIGC50	TP	Zhu et al., 2008
1811	Propylmalonic acid diethyl ester	C(C(C(OCC)=O)C(OCC)=O)CC	0.13	pIGC50	TP	Zhu et al., 2008
1812	Malonic acid,acetamido-,diethyl ester	CC(=O)NC(C(=O)OCC)C(=O)OCC	-1.2	pIGC50	TP	Zhu et al., 2008
1813	Diethyl 2-allylmalonate	C(C(C(OCC)=O)C(OCC)=O)C=C	-0.06	pIGC50	TP	Zhu et al., 2008
1814	ENT 666	C(C(OCCCC)=O)CC(OCCCC)=O	0.51	pIGC50	TP	Zhu et al., 2008
1815	Natriumpropionat (German)	C(CC)(=O)[O-]	-1.45	pIGC50	TP	Zhu et al., 2008
1816	Butyric acid,sodium salt (8CI)	CCCC([O-])=O	-1.37	pIGC50	TP	Zhu et al., 2008
1817	SODIUM OCTANOATE-1-13C	CCCCCCCC([O-])=O	0	pIGC50	TP	Zhu et al., 2008
1818	Jantaran sodny (Czech)	C(CCC(=O)[O-])(=O)[O-]	-1.65	pIGC50	TP	Zhu et al., 2008
1819	NCI-C60968	C(C)(C)C=O	-0.43	pIGC50	TP	Zhu et al., 2008
1820	n-Valeraldehyde (ACGIH)	C(CCCC)=O	-0.02	pIGC50	TP	Zhu et al., 2008
1821	Butyraldehyde,2-methyl-	C(CC)(C=O)C	-0.31	pIGC50	TP	Zhu et al., 2008
1822	Pentanal,2-methyl-	CCCC(C=O)C	-0.47	pIGC50	TP	Zhu et al., 2008
1823	3,3-Dimethylbutanal	CC(C)(CC=O)C	-0.37	pIGC50	TP	Zhu et al., 2008
1824	WLN: VH7	C(CCCCCCC)=O	0.48	pIGC50	TP	Zhu et al., 2008
1825	beta-Propyl-alpha-ethylacrolein	C(C(CC)CCCC)=O	0.16	pIGC50	TP	Zhu et al., 2008
1826	Undecanaldehyde	CCCCCCCCCCC=O	1.69	pIGC50	TP	Zhu et al., 2008
1827	NCINSC#55212	C(CCCCCC)CCCCC=O	1.76	pIGC50	TP	Zhu et al., 2008
1828	2-Oxetanone	O=C1CCO1	-0.13	pIGC50	TP	Zhu et al., 2008
1829	1,4-Butanolide	O=C1CCCO1	-1.72	pIGC50	TP	Zhu et al., 2008
1830	2-Oxetanone,4-methyl-	O=C1CC(C)O1	-0.76	pIGC50	TP	Zhu et al., 2008
1831	gamma-Ethylbutyrolactone	CCC1OC(=O)CC1	-1.24	pIGC50	TP	Zhu et al., 2008
1832	Hexanoic acid,epsilon-lactone	O1C(CCCCC1)=O	-1.26	pIGC50	TP	Zhu et al., 2008
1833	Prunolide	C1CC(OC1=O)CCCCC	0.01	pIGC50	TP	Zhu et al., 2008
1834	gamma-n-Decalactone	C(CC1OC(=O)CC1)CCCC	0.49	pIGC50	TP	Zhu et al., 2008
1835	2-Butynol	CC#CCO	-0.87	pIGC50	TP	Zhu et al., 2008
1836	DL-3-butyn-2-ol	C#CC(O)C	-0.4	pIGC50	TP	Zhu et al., 2008
1837	2-Pentyn-1-ol	CCC#CCO	-0.57	pIGC50	TP	Zhu et al., 2008
1838	2-Penten-4-yn-1-ol	C(=CC#C)CO	-0.55	pIGC50	TP	Zhu et al., 2008
1839	Propylethinylcarbinol	CCCC(O)C#C	0.66	pIGC50	TP	Zhu et al., 2008
1840	1-Butynyl ethyl Carbinol	CCC#CC(O)C	0.51	pIGC50	TP	Zhu et al., 2008
1841	3-Hexyne-3,5-diol	C(#CC(C)O)C(C)O	-0.46	pIGC50	TP	Zhu et al., 2008
1842	n-Butyl ethynyl Carbinol	CCCCC(O)C#C	-0.27	pIGC50	TP	Zhu et al., 2008
1843	2-Heptynol	CCCCC#CCO	-0.19	pIGC50	TP	Zhu et al., 2008
1844	2-Nonyn-1-ol	CCCCCCC#CCO	0.65	pIGC50	TP	Zhu et al., 2008
1845	n-Heptylhydroxymethylacetylene	CCCCCCCC#CCO	0.99	pIGC50	TP	Zhu et al., 2008
1846	2-Tridecyn-1-ol	C(O)C#CCCCCCCCCCC	2.37	pIGC50	TP	Zhu et al., 2008
1847	1-Pentyn-3-ol,4-methyl-(8CI9CI)	CC(C)C(O)C#C	-0.03	pIGC50	TP	Zhu et al., 2008
1848	Ethynyl isobutyl Carbinol	C#CC(O)CC(C)C	0.62	pIGC50	TP	Zhu et al., 2008
1849	4-Methyl-1-heptyn-3-ol	C#CC(O)C(C)CCC	0.74	pIGC50	TP	Zhu et al., 2008
1850	Aethylenechlorhydrin (German)	C(CCl)O	-1.42	pIGC50	TP	Zhu et al., 2008
1851	1-Chloro-2-propanol,technical grade	C(C(C)O)Cl	-1.49	pIGC50	TP	Zhu et al., 2008
1852	Ethanol,2,2,2-trichloro-	C(C(Cl)(Cl)Cl)O	-0.46	pIGC50	TP	Zhu et al., 2008
1853	1-Hexanol,6-chloro-	C(CCCO)CCCl	-0.27	pIGC50	TP	Zhu et al., 2008
1854	Hexamethylene bromohydrin	OCCCCCCBr	0.01	pIGC50	TP	Zhu et al., 2008
1855	Octamethylene bromohydrin	C(CCCCCCCBr)O	1.04	pIGC50	TP	Zhu et al., 2008
1856	3-Bromo-2,2-dimethyl-1-propanol	C(C(CO)(C)C)Br	-0.46	pIGC50	TP	Zhu et al., 2008
1857	bromo-2-propanol,1-	CC(CBr)O	-1.19	pIGC50	TP	Zhu et al., 2008
1858	2,3-Dibromopropan-1-ol	C(C(CBr)Br)O	-0.49	pIGC50	TP	Zhu et al., 2008
1859	1-Butanol,4-bromo-,acetate(8CI9CI)	O(CCCCBr)C(C)=O	0.39	pIGC50	TP	Zhu et al., 2008
1860	1-Acetoxy-5-chloropentane	C(COC(C)=O)CCCCl	-0.13	pIGC50	TP	Zhu et al., 2008
1861	Methyl 5-bromopentanoate	COC(=O)CCCCBr	-0.08	pIGC50	TP	Zhu et al., 2008
1862	Pentanoic acid,5-bromo-,ethyl ester (9CI)	CCOC(=O)CCCCBr	0.22	pIGC50	TP	Zhu et al., 2008
1863	ethyl-6-bromo hexanoate	O(CC)C(=O)CCCCCBr	0.59	pIGC50	TP	Zhu et al., 2008
1864	Propanoic acid,3-chloro-,ethyl ester (9CI)	O=C(OCC)CCCl	-0.5	pIGC50	TP	Zhu et al., 2008
1865	Ethyl .gamma.-chlorobutyrate	clCCCC(=O)OCC	-0.28	pIGC50	TP	Zhu et al., 2008
1866	Pentanenitrile,5-bromo- (9CI)	N#CCCCCBr	-0.21	pIGC50	TP	Zhu et al., 2008
1867	6-Cyanohexyl bromide	N#CCCCCCCBr	0.51	pIGC50	TP	Zhu et al., 2008
1868	Propionitrile,3-chloro-	C(CCCl)#N	-1	pIGC50	TP	Zhu et al., 2008
1869	Butyric acid,4-bromo-	OC(=O)CCCBr	-0.77	pIGC50	TP	Zhu et al., 2008
1870	Propionic acid,3-bromo-	C(CCBr)(=O)O	-0.04	pIGC50	TP	Zhu et al., 2008
1871	Butanoic acid,4-chloro- (9CI)	C(CCCCl)(=O)O	-0.68	pIGC50	TP	Zhu et al., 2008
1872	Propionic acid,3-chloro-	C(CCCl)(=O)O	-0.33	pIGC50	TP	Zhu et al., 2008
1873	5-Chloropentanoic acid	OC(=O)CCCCCl	-0.29	pIGC50	TP	Zhu et al., 2008
1874	Butyric acid,2-bromo-3-methyl-	C(C(C(C)C)Br)(=O)O	-0.55	pIGC50	TP	Zhu et al., 2008
1875	2-Bromohexanoic acid	CCCCC(C(=O)O)Br	0.45	pIGC50	TP	Zhu et al., 2008
1876	374	C(NN)(C)=O	-1.38	pIGC50	TP	Zhu et al., 2008
1877	Butryic acid hydrazide	C(C(NN)=O)CC	-0.97	pIGC50	TP	Zhu et al., 2008
1878	Adipic acid,dihydrazide (8CI)	NNC(CCCCC(NN)=O)=O	-1.37	pIGC50	TP	Zhu et al., 2008
1879	Formhydrazid (German)	C(NN)=O	-0.87	pIGC50	TP	Zhu et al., 2008
1880	Nitrile adipico(ITALIAN)	C(CCCC#N)C#N	-1.54	pIGC50	TP	Zhu et al., 2008
1881	Acetylaceetone	CC(CC(C)=O)=O	-0.27	pIGC50	TP	Zhu et al., 2008
1882	Tetrahydroquinone	C1CC(CCC1=O)=O	-1.67	pIGC50	TP	Zhu et al., 2008
1883	3,5-heptadione	C(C(CC)=O)C(=O)CC	-0.38	pIGC50	TP	Zhu et al., 2008
1884	2,4-Octanedione	CC(=O)CC(=O)CCCC	0.13	pIGC50	TP	Zhu et al., 2008
1885	NCINSC#20699	C(C(=O)C)C(=O)CCCCC	0.51	pIGC50	TP	Zhu et al., 2008
1886	2-Aminoaethanol (German)	C(CN)O	-1.39	pIGC50	TP	Zhu et al., 2008
1887	1-Propanol,3-amino-	NCCCO	-1.69	pIGC50	TP	Zhu et al., 2008
1888	Monomethyl-aminoaethanol (German)	C(CNC)O	-1.82	pIGC50	TP	Zhu et al., 2008
1889	Ethanol,2-(ethylamino)-	OCCNCC	-1.65	pIGC50	TP	Zhu et al., 2008
1890	2-Amino-2-methyl-1-propanol	CC(CO)(N)C	-1.93	pIGC50	TP	Zhu et al., 2008
1891	DL-2-AMINO-1-PENTANol	C(CCC)(CO)N	-0.67	pIGC50	TP	Zhu et al., 2008
1892	Neopentanolamine	NCC(CO)(C)C	-0.92	pIGC50	TP	Zhu et al., 2008
1893	1-Hexanol,6-amino- (8CI9CI)	C(CCCO)CCN	-0.96	pIGC50	TP	Zhu et al., 2008
1894	DL-NORLEUCINol	C(CCCC)(CO)N	-0.58	pIGC50	TP	Zhu et al., 2008
1895	(DL-VALINOL)	CC(C)C(N)CO	-0.59	pIGC50	TP	Zhu et al., 2008
1896	L-t-Leucinol	C(N)(C(C)(C)C)CO	-0.72	pIGC50	TP	Zhu et al., 2008
1897	L-Isoleucinol	NC(CO)C(C)CC	-0.66	pIGC50	TP	Zhu et al., 2008
1898	L-Leucinol.HCl	CC(C)CC(N)CO	-0.62	pIGC50	TP	Zhu et al., 2008
1899	Ethanol,2-((1,1-dimethylethyl)amino)-	C(NCCO)(C)(C)C	-1.67	pIGC50	TP	Zhu et al., 2008
1900	1,2-Propanediol,3-amino-	OCC(O)CN	-1.81	pIGC50	TP	Zhu et al., 2008
1901	1,3-Benzodioxole-5-ethanamine,N-ethyl-alpha-methyl-	C(CN(C)CCO)O	-1.83	pIGC50	TP	Zhu et al., 2008
1902	Triethanolamine	OCCN(CCO)CCO	-1.75	pIGC50	TP	Zhu et al., 2008
1903	RCRA waste number U194	C(CC)N	-0.71	pIGC50	TP	Zhu et al., 2008
1904	Butylamine,N-	C(CCC)N	-0.57	pIGC50	TP	Zhu et al., 2008
1905	1-Propanamine,N-methyl- (9CI)	C(CNC)C	-0.81	pIGC50	TP	Zhu et al., 2008
1906	1-Heptylamine	C(CCCN)CCC	0.21	pIGC50	TP	Zhu et al., 2008
1907	Amine OD	CCCCCCCCN	0.35	pIGC50	TP	Zhu et al., 2008
1908	1-Nonylamine	CCCCCCCCCN	1.7	pIGC50	TP	Zhu et al., 2008
1909	Decylamine	NCCCCCCCCCC	2.06	pIGC50	TP	Zhu et al., 2008
1910	Monoundecylamine	CCCCCCCCCCCN	2.33	pIGC50	TP	Zhu et al., 2008
1911	Isopropylamine (ACGIH:OSHA)	CC(C)N	-0.86	pIGC50	TP	Zhu et al., 2008
1912	2-Butanamine	CC(N)CC	-0.67	pIGC50	TP	Zhu et al., 2008
1913	1-Methyl-n-butylamine	C(C(C)N)CC	-0.68	pIGC50	TP	Zhu et al., 2008
1914	Propylamine,1-ethyl- (8CI)	C(C(CC)N)C	-0.81	pIGC50	TP	Zhu et al., 2008
1915	S-(-)-2-METHYLBUTYLAMINE	CCC(CN)C	-0.48	pIGC50	TP	Zhu et al., 2008
1916	butylamine,t-	CC(C)(N)C	-0.9	pIGC50	TP	Zhu et al., 2008
1917	TERT-PENTYLAMINE	NC(CC)(C)C	-0.7	pIGC50	TP	Zhu et al., 2008
1918	Propylamine,1,2-dimethyl-	CC(C(C)N)C	-0.71	pIGC50	TP	Zhu et al., 2008
1919	3-Aminopropyne	C(C#C)N	-0.83	pIGC50	TP	Zhu et al., 2008
1920	2-Propyn-1-amine,N-methyl-(9CI)	C(CNC)#C	-0.98	pIGC50	TP	Zhu et al., 2008
1921	N,n-Dimethylpropargylamine	C#CCN(C)C	-1.15	pIGC50	TP	Zhu et al., 2008
1922	Propylamine,3-methoxy-	COCCCN	-1.77	pIGC50	TP	Zhu et al., 2008
1923	MOIPA	NC(COC)C	-0.83	pIGC50	TP	Zhu et al., 2008
1924	Acide propionique (French)	C(CC)(=O)O	-0.51	pIGC50	TP	Zhu et al., 2008
1925	Butyric acid [butyric acid sodium]	C(CCC)(=O)O	-0.57	pIGC50	TP	Zhu et al., 2008
1926	Hexacid C-7	C(CCCCCC)(=O)O	-0.11	pIGC50	TP	Zhu et al., 2008
1927	Kyselina kaprylova,smesizomeru (Czech)	C(CCCCCC)C(=O)O	0.08	pIGC50	TP	Zhu et al., 2008
1928	Nonanoic acid	C(CCCCCCC)C(=O)O	0.35	pIGC50	TP	Zhu et al., 2008
1929	Hexacid 1095	C(CCCCCCCC)C(=O)O	0.51	pIGC50	TP	Zhu et al., 2008
1930	NSC 7885	C(CCCCCC)CCCC(=O)O	0.9	pIGC50	TP	Zhu et al., 2008
1931	Kyselina isomaselna (Czech)	C(C(C)C)(=O)O	-0.33	pIGC50	TP	Zhu et al., 2008
1932	Isovalerianic	C(CC(C)C)(=O)O	-0.34	pIGC50	TP	Zhu et al., 2008
1933	Kyselina 2,2-dimethylpropionova (Czech)	C(C(C)(C)C)(=O)O	-0.25	pIGC50	TP	Zhu et al., 2008
1934	PENTANOIC ACID,3-METHYL-	OC(=O)CC(C)CC	-0.23	pIGC50	TP	Zhu et al., 2008
1935	Butyric acid,2-ethyl-	C(C(CC)CC)(=O)O	-0.15	pIGC50	TP	Zhu et al., 2008
1936	Acido valproico (Spanish)	CCCC(CCC)C(O)=O	0.03	pIGC50	TP	Zhu et al., 2008
1937	.beta.-Butenoic acid	OC(=O)CC=C	-0.64	pIGC50	TP	Zhu et al., 2008
1938	trans-3-Hexanoic acid	OC(=O)CC=CCC	-0.22	pIGC50	TP	Zhu et al., 2008
1939	Kyselina malonova (Czech)	C(CC(=O)O)(=O)O	-0.71	pIGC50	TP	Zhu et al., 2008
1940	Kyselina jantarova (Czech)	C(CCC(=O)O)(=O)O	-0.94	pIGC50	TP	Zhu et al., 2008
1941	Pentandioic acid	C(CCCC(=O)O)(=O)O	-0.64	pIGC50	TP	Zhu et al., 2008
1942	Pimelic acid (8CI)	C(CCCCCC(=O)O)(=O)O	-0.58	pIGC50	TP	Zhu et al., 2008
1943	Acide sebacique (French)	C(CCCCCCCCC(=O)O)(=O)O	-0.27	pIGC50	TP	Zhu et al., 2008
1944	Crotonic acid,(E)- (8CI)	C(C)=CC(O)=O	-0.54	pIGC50	TP	Zhu et al., 2008
1945	Valerenic acid with HPLC	CCC=CC(O)=O	-0.28	pIGC50	TP	Zhu et al., 2008
1946	2-HEXENOIC ACID,(E)-	OC(=O)C=CCCC	-0.13	pIGC50	TP	Zhu et al., 2008
1947	Carboxyacetylene	C(C#C)(=O)O	-0.29	pIGC50	TP	Zhu et al., 2008
1948	2-Octyn-1-oic acid	CCCCCC#CC(=O)O	-0.06	pIGC50	TP	Zhu et al., 2008
1949	2-Nonynoic acid (8CI9CI)	C(CC#CC(=O)O)CCCC	0.71	pIGC50	TP	Zhu et al., 2008
1950	Isothiocyanic acid,ethyl ester	CCN=C=S	1.63	pIGC50	TP	Zhu et al., 2008
1951	Isothiocyanic Acid n-Propyl ester	C(N=C=S)CC	1.69	pIGC50	TP	Zhu et al., 2008
1952	Isothiocyanic acid,butyl ester	C(CN=C=S)CC	1.72	pIGC50	TP	Zhu et al., 2008
1953	n-Hex-1-yl isothiocyanate	C(N=C=S)CCCCC	1.75	pIGC50	TP	Zhu et al., 2008
1954	2,2-Dimethylpropyl isothiocyanate	C(N=C=S)(C)(C)CC	0.35	pIGC50	TP	Zhu et al., 2008
1955	1,3-propylene diisothiocyanate	S=C=NCCCN=C=S	2.72	pIGC50	TP	Zhu et al., 2008
1956	Pentanoic acid,Chloride	C(CCC(Cl)=O)C	-0.34	pIGC50	TP	Zhu et al., 2008
1957	N-Hexanoyl Chloride	C(CCCCC)(=O)Cl	0.34	pIGC50	TP	Zhu et al., 2008
1958	n-Heptanoyl Chloride	C(CCCCCC)(=O)Cl	0.46	pIGC50	TP	Zhu et al., 2008
1959	OTCL	CCCCCCCC(Cl)=O	0.41	pIGC50	TP	Zhu et al., 2008
1960	Pentanoic acid,2-bromo-,ethyl ester (9CI)	CCOC(=O)C(Br)CCC	0.7	pIGC50	TP	Zhu et al., 2008
1961	Hexanoic acid,2-bromo-,ethyl ester (8CI9CI)	C(C(CCCC)Br)(OCC)=O	0.86	pIGC50	TP	Zhu et al., 2008
1962	Propanoic acid,2-bromo-,ethyl ester	C(C(C)Br)(=O)OCC	1.06	pIGC50	TP	Zhu et al., 2008
1963	Propanoic acid,2,3-dibromo-,ethyl ester	C(C(C(=O)OCC)Br)Br	2.21	pIGC50	TP	Zhu et al., 2008
1964	Ethyl 2,3-dibromobutanoate	C(C(C(Br)C)Br)(OCC)=O	1.44	pIGC50	TP	Zhu et al., 2008
1965	Propanoic acid,2-chloro-,ethyl ester(9CI)	C(C(C)Cl)(=O)OCC	-0.43	pIGC50	TP	Zhu et al., 2008
1966	Malonic acid,chloro-,diethyl ester	C(C(OCC)=O)(C(OCC)=O)Cl	0.63	pIGC50	TP	Zhu et al., 2008
1967	Ethyl .alpha.-bromo-.alpha.-methylpropionate	CCOC(=O)C(C)(C)Br	0.15	pIGC50	TP	Zhu et al., 2008
1968	2-Propanone,1,1-dichloro-	C(C(C)=O)(Cl)Cl	0.64	pIGC50	TP	Zhu et al., 2008
1969	2-Butanone,3-chloro-	CC(Cl)C(=O)C	0.27	pIGC50	TP	Zhu et al., 2008
1970	HYDROXYL NUMBER REAGENT	C(C(Br)(C)C)(C(Br)(C)C)=O	0.51	pIGC50	TP	Zhu et al., 2008
1971	2,5-DIBROMO-3,4-HEXANEDIONE	C(C(C(Br)C)=O)(C(Br)C)=O	2.17	pIGC50	TP	Zhu et al., 2008
1972	2-Butene,1,4-dibromo-,trans-	C(C=CCBr)Br	1.92	pIGC50	TP	Zhu et al., 2008
1973	2-CHLOROPROPIONITRILE	C(C#N)(C)Cl	-0.86	pIGC50	TP	Zhu et al., 2008
1974	chloroacetonitrile [monochloroacetonitrile]	C(CCl)#N	0.85	pIGC50	TP	Zhu et al., 2008
1975	dichloromethyl Cyanide [Dichloroacetonitrile]	N#CC(Cl)Cl	0.97	pIGC50	TP	Zhu et al., 2008
1976	2-Propanone,1,3-dichloro-	C(C(CCl)=O)Cl	2.05	pIGC50	TP	Zhu et al., 2008
1977	Nitrile trichloracetique (FRENCH)	C(C(Cl)(Cl)Cl)#N	1.88	pIGC50	TP	Zhu et al., 2008
1978	Bromessigsaeurenitril	C(Br)C#N	2.23	pIGC50	TP	Zhu et al., 2008
1979	Dibrommethylcyanid	C(C(Br)Br)#N	2.4	pIGC50	TP	Zhu et al., 2008
1980	Diethylene disulfide	C1CSCCS1	-0.11	pIGC50	TP	Zhu et al., 2008
1981	TL 158	CCOS(=O)OCC	-0.99	pIGC50	TP	Zhu et al., 2008
1982	Ethene,1,1'-sulfonylbis-	S(C=C)(C=C)(=O)=O	1.41	pIGC50	TP	Zhu et al., 2008
1983	Ethyl vinyl sulfone	C(S(C=C)(=O)=O)C	0.11	pIGC50	TP	Zhu et al., 2008
1984	NSC 6953	C1(C=CC=CC=1)S	1.66	pIGC50	TP	Zhu et al., 2008
1985	1-Thiaindene	C1(C=CS2)=C2C=CC=C1	0.26	pIGC50	TP	Zhu et al., 2008
1986	WLN: T C666 BO ISJ	C12=C(C=CC=C2)SC3=C(C=CC=C3)O1	2.04	pIGC50	TP	Zhu et al., 2008
1987	Phenyl n-propyl sulfide	CCCSC1=CC=CC=C1	0.86	pIGC50	TP	Zhu et al., 2008
1988	(PHENYLTHIOETHYLENE)	C1(=CC=CC=C1)SC=C	0.42	pIGC50	TP	Zhu et al., 2008
1989	Vinyl Phenyl Sulfoxide	O=S(C=C)C1=CC=CC=C1	0.16	pIGC50	TP	Zhu et al., 2008
1990	Ethylsulfonylbenzene	C1=CC=CC(=C1)S(CC)(=O)=O	-0.79	pIGC50	TP	Zhu et al., 2008
1991	Phenyl allyl sulfone	C(S(=O)(=O)C1=CC=CC=C1)C=C	0.31	pIGC50	TP	Zhu et al., 2008
1992	Sulfone,phenyl vinyl	C(S(=O)(=O)C1=CC=CC=C1)=C	1.28	pIGC50	TP	Zhu et al., 2008
1993	4-n-Butylphenyl isothiocyanate	C1ccc(CCCC)cc1N=C=S	2.76	pIGC50	TP	Zhu et al., 2008
1994	1-Naphthylisothiocyanate	C1c2c(N=C=S)cccc2ccc1	2.14	pIGC50	TP	Zhu et al., 2008
1995	L-alpha-Methylbenzyl isothiocyanate	c1ccccc1C(C)N=C=S	2.71	pIGC50	TP	Zhu et al., 2008
1996	Diphenyl-isothiocyanatomethane	C1ccccc1C(N=C=S)c2ccccc2	3.05	pIGC50	TP	Zhu et al., 2008
1997	2-Isothiocyanatoethylbenzene	C1ccccc1CCN=C=S	2.54	pIGC50	TP	Zhu et al., 2008
1998	1-Naphthylmethylisothiocyanate	C1c2c(CN=C=S)cccc2ccc1	3.05	pIGC50	TP	Zhu et al., 2008
1999	2-Propenoyl isothiocyanate,3-phenyl- (9CI)	O=C(N=C=S)C=CC1=CC=CC=C1	0.29	pIGC50	TP	Zhu et al., 2008
[truncated: 1,409 more rows]
